# Supplementary material for: Variation and genetic basis of mineral content in potato tubers and prospects for genomic selection
Source: Front Plant Sci. 2023 Dec 22;14:1301297. doi: 10.3389/fpls.2023.1301297 (PMC10766833; doi:10.3389/fpls.2023.1301297)
Supplement: Supplementary file 2 [file Table_1.xlsx]

## Sheet: Sheet1
Supplementary Table 1: Planting and harvest dates, soil type, and fertilization used in trials, including 214 potato genotypes evaluated for tuber minerals content in Texas.
Year	Location	Planting date	Harvest date	Soil type	Fertilizer
2019	Dalhart, TX	2023-05-16	2023-09-24	Dallum Fine Sand Loam	294 kg N, 301 kg P2O5, and 638 kg K2O per ha.
2020	Dalhart, TX	2023-05-09	2023-09-02	Dallum Fine Sand Loam	294 kg N, 301 kg P2O5, and 638 kg K2O per ha.
2020	Springlake, TX	2023-03-30	2023-07-15	Tivoli Fine Sand	220 kg N, 72 kg P2O5, and 72 kg K2O per ha.
