# Supplementary material for: Variation and genetic basis of mineral content in potato tubers and prospects for genomic selection
Source: Front Plant Sci. 2023 Dec 22;14:1301297. doi: 10.3389/fpls.2023.1301297 (PMC10766833; doi:10.3389/fpls.2023.1301297)
Supplement: Supplementary file 3 [file Table_2.xlsx]

## Sheet: Sheet1
Supplementary Table 2: Overall BLUE values of 214 potatoes for mineral contents (in dry weight basis) evaluated in Dalhart, Texas in 2019 and 2020, and Springlake, Texas in 2020.
Genotype	N	P	K	Ca	Mg	S	Na	Zn	Fe	Cu	Mn	B
	(%)	(mg/g)	(mg/g)	(mg/g)	(mg/g)	(mg/g)	(μg/g)	(μg/g)	(μg/g)	(μg/g)	(μg/g)	(μg/g)
AOR07781-2	1.54473	3.05416	21.1785	0.352379	1.18589	1.27002	273.938	14.581	24.654	3.04283	5.98767	3.1155
AORTX09037-1W/Y	1.89823	3.58775	26.2544	0.227451	1.07404	1.41934	188.643	17.656	23.2675	3.97983	5.07833	3.045
AOTX02136-1Ru	1.74897	3.63484	22.8069	0.50745	1.30683	1.34024	292.452	17.6945	23.415	4.28	7.46933	3.93983
AOTX03187-1Ru	1.32166	3.09886	20.9257	0.449771	0.932714	1.06873	246.153	15.991	22.1723	3.19483	5.67667	2.898
AOTX05043-1Ru	1.76177	3.77073	22.686	0.505007	1.16147	1.37171	270.104	19.3798	24.2507	3.14983	7.13217	3.82333
AOTX91861-4R	2.01659	3.87957	28.4034	0.332517	1.18512	1.56754	236.364	24.9707	23.3438	4.33107	7.40767	4.51183
AOTX93483-1R	2.06211	4.26152	27.68	0.349056	1.13035	1.59775	341.262	23.5868	23.2325	4.72017	6.0555	4.528
AOTX95265-1Ru	1.77345	3.72412	23.9276	0.671937	1.26833	1.40123	350.238	18.5171	26.9304	3.69171	7.41665	3.45806
AOTX95265-4Ru	1.71578	3.60242	25.1273	0.704949	1.22402	1.31223	388.385	17.2813	23.9471	3.33306	6.70405	3.40327
AOTX95295-3Ru	1.93096	3.49369	23.6368	0.724405	1.26837	1.44502	259.372	16.4418	20.6721	3.28708	7.38827	2.90538
AOTX95309-1W	1.80785	3.45108	26.0107	0.31576	1.08276	1.53037	368.314	19.665	18.8998	4.36983	5.84733	3.39417
AOTX95309-2W*	1.82654	3.48581	21.9104	0.27849	1.17689	1.35956	255.173	18.2812	23.5087	4.0095	7.61433	3.55667
AOTX96075-1Ru	1.79424	3.73671	24.8145	0.57914	1.2687	1.3527	354.791	18.5487	24.7417	3.53133	7.018	3.3155
AOTX96084-1Ru	1.80138	3.55003	24.1981	0.591267	1.16505	1.30978	315.414	16.54	20.9487	3.44183	6.31617	3.32383
AOTX96208-1Ru	1.66709	3.52048	23.5341	0.708799	1.19237	1.30388	388.092	15.4493	25.6057	3.64067	6.14083	3.38017
AOTX96216-1Ru	1.6729	3.44095	23.6773	0.607275	1.16154	1.53578	427.025	18.2867	25.7287	3.07	5.43333	3.3085
AOTX96216-2Ru	1.69338	3.54465	23.8887	0.599068	1.12235	1.4859	303.585	18.4763	21.2875	3.29183	5.42967	3.14217
AOTX97213-1Ru	1.4741	3.33112	26.0213	0.734059	1.19697	1.24984	363.699	13.9139	24.2199	2.86926	5.47912	3.37435
AOTX98096-1Ru*	1.69384	3.66054	23.3522	0.552716	1.13335	1.31337	366.163	17.1192	22.5813	3.486	5.6775	3.29383
AOTX98137-1Ru	1.87021	3.41793	22.3502	0.613013	1.27985	1.44935	352.384	16.3092	23.1772	3.2655	6.81367	3.35767
AOTX98152-3Ru	1.67496	3.26852	21.1184	0.580514	1.10145	1.23195	339.25	16.6532	23.6623	2.83883	5.17783	2.98
AOTX98202-1Ru	1.80827	3.79643	23.296	0.490726	1.22645	1.39901	375.165	19.1207	25.677	4.27533	6.2655	4.0955
Atlantic	1.54358	2.97058	23.7461	0.299451	0.810393	1.16182	196.385	16.2927	18.8265	2.925	3.85033	2.76267
ATTX00289-4W	2.08233	3.42454	22.2258	0.403828	1.05648	1.53847	263.074	18.3358	22.181	4.51667	5.27033	3.01867
ATTX00289-5R/Y	1.95528	3.89553	27.8959	0.406125	1.27818	1.67999	283.625	20.3658	25.1985	4.73683	6.57867	3.83717
ATTX00289-6Y/Y	1.77797	3.648	24.9065	0.391577	1.17858	1.3431	149.487	16.4807	20.0735	3.48717	5.86017	3.08767
ATTX01178-1R	2.27629	4.06553	25.5881	0.375875	1.29649	1.7187	326.36	25.5803	22.8067	4.70367	7.01617	3.71483
ATTX01180-1R/Y	1.89797	3.83638	26.5073	0.353925	1.09031	1.39202	297.319	18.9615	22.2443	3.04317	5.59733	3.116
ATTX03516-2R	1.95406	3.67454	26.0706	0.348645	1.11339	1.53883	230.801	20.9485	24.3585	3.199	7.27871	3.82283
ATTX05175s-1R/Y	1.57451	3.82477	26.1902	0.345049	1.02108	1.36961	207.147	22.3883	22.2555	3.6565	5.66367	3.73267
ATTX05186-2R	2.15489	3.97663	26.0317	0.346579	1.10369	1.74577	329.119	21.2818	24.7267	4.83317	6.27233	3.81583
ATTX06246-1R	1.93455	3.78783	24.7605	0.268968	1.18411	1.5374	126.217	20.1705	25.1977	3.524	6.33633	3.52417
ATTX07042-3W	1.69221	3.06693	24.2582	0.470791	1.04021	1.26311	247.249	15.9635	23.5037	3.09983	5.32917	3.40433
ATTX10265-4R/Y	1.81348	3.98363	27.5033	0.404108	1.13645	1.43093	203.564	16.5043	20.8957	3.47667	5.9325	3.51317
ATTX88481-1P/W	1.91389	3.75439	23.8881	0.2809	1.08362	1.44471	188.739	23.3037	23.8273	3.97767	6.31983	2.82567
ATTX88654-2P/Y	1.67597	3.7846	26.8806	0.278671	0.946512	1.33505	263.982	19.8018	20.2888	3.81467	4.781	3.52267
ATTX95490-2W	2.17106	4.11359	30.1117	0.369618	1.13076	1.64926	178.034	21.3287	25.3425	4.72159	5.90033	3.4495
ATTX961014-1AR/Y	1.76805	3.53977	22.8318	0.225435	1.14586	1.31249	277.818	19.9829	22.6899	3.63059	7.13694	3.40956
ATTX961014-1Br/Y	1.69321	3.35409	22.2509	0.288621	1.15331	1.26079	286.266	17.7092	22.7908	3.70533	7.00217	3.15633
ATTX961014-1R/Y Chimera	2.0459	4.05803	26.6971	0.348718	1.14157	1.5883	264.546	23.4735	23.1563	3.77583	6.06433	3.84683
ATTX96746-1R*	1.92376	3.61718	24.5726	0.442901	1.1606	1.53868	309.532	27.0388	25.2328	3.25167	5.77967	4.0025
ATTX98444s-16R/Y	1.81611	3.80505	24.5774	0.288268	1.07204	1.4016	256.274	16.7373	22.65	3.17017	6.04617	3.35717
ATTX98448-6R/Y	1.98486	3.99851	27.0017	0.52075	1.22648	1.58259	185.196	21.7287	22.7003	4.26567	6.49817	3.8075
ATTX98453-11Br	2.00618	4.01247	27.5943	0.435398	1.1214	1.53882	278.094	23.1318	23.5148	4.262	5.96817	4.363
ATTX98453-3R	2.04645	4.13233	27.7513	0.551146	1.10387	1.48499	340.727	24.4707	22.955	4.67917	5.59717	3.4815
ATTX98453-6R	2.06841	3.72191	24.4683	0.409539	1.05381	1.56552	309.802	26.256	26.1297	4.55717	6.21317	3.66233
ATTX98462s-3R/Y	1.63787	3.31215	23.6058	0.362963	1.11292	1.26977	307.452	19.5205	23.2752	3.363	6.70083	3.38
ATTX98465-1R/Y	1.87	3.85308	25.7426	0.452936	1.03347	1.37562	218.494	23.1997	21.438	4.21483	6.10233	4.05733
ATTX98466-5R/WR	1.96493	3.81327	24.7342	0.322619	1.05427	1.57653	228.275	25.8078	22.1093	3.78983	4.97917	3.84533
ATTX98468-5Ru/Y*	1.7891	3.43143	21.8126	0.481303	1.10731	1.37685	411.457	15.5538	23.022	4.52667	5.7755	2.72183
ATTX98491-4Yrdspl/Y	1.64164	3.79043	26.9642	0.352247	1.02245	1.19797	394.981	18.559	23.5262	3.29167	5.4045	3.6115
ATTX98493-1AR	1.98268	3.90157	25.6962	0.2997	1.10377	1.42306	268.743	17.0817	21.5957	3.936	7.25967	3.625
ATTX98493-2P/P	1.80174	3.57817	24.2499	0.270515	1.05474	1.31682	163.965	18.4473	24.0202	3.6055	5.5385	2.3675
ATTX98500-2P/Y	1.66139	4.13594	28.4463	0.423374	1.07209	1.42434	248.665	22.2627	22.0512	3.20767	5.62983	2.74383
ATTX98500-3P/Y	1.80699	4.03061	28.46	0.368043	1.15894	1.40658	234.763	26.2108	24.8155	4.48017	6.703	4.10117
ATTX98510-1R/Y	1.91349	3.66897	25.3936	0.241173	1.12041	1.4682	177.991	17.0437	23.1707	3.49883	6.16333	3.07783
ATTX98514-1R/Y	1.91949	3.9534	25.2929	0.346349	1.0722	1.43753	226.82	19.1368	23.5968	3.13133	5.76617	3.16617
ATTX98518-5P/Y	1.94795	3.80264	28.3465	0.434242	1.24657	1.45035	260.171	19.6992	22.5932	3.67283	7.29967	2.945
ATTX99325-1P	1.87295	3.5399	23.4645	0.30581	1.08343	1.40416	242.373	21.4153	22.7972	4.10833	6.0045	2.68833
ATX02263-1R/Y	1.89006	3.83289	25.804	0.351338	1.0531	1.43343	297.475	19.9797	21.9885	3.911	6.999	3.23583
ATX03496-3Y/Y	2.02385	3.8731	24.2825	0.462503	1.14025	1.36295	179.376	19.5742	20.101	3.42217	6.40417	3.2585
ATX03564-1Y/Y	1.6333	3.87529	24.7723	0.480762	1.04789	1.18946	212.902	20.3933	23.4897	4.64933	5.65567	3.85467
ATX05186-1R	1.92883	4.05375	26.3085	0.393512	1.13049	1.72399	258.77	21.6752	24.2657	3.97131	5.6885	4.76883
ATX05202s-3W/Y	1.79367	4.27292	27.3565	0.504055	1.21776	1.63009	312.763	24.4077	20.1108	5.49133	6.10483	4.04233
ATX06264s-4R/Y	1.90197	4.00429	26.4763	0.34383	1.1296	1.67857	243.94	24.3447	20.7745	3.944	5.60517	3.529
ATX07305S-1Y/Y	1.71247	3.58255	24.1473	0.486931	0.989023	1.37781	250.889	18.8843	20.533	5.05633	6.096	4.1015
ATX08181-5Y/Y	1.74907	3.74928	25.2078	0.554653	1.23897	1.34708	353.169	20.9163	21.9338	4.18667	5.74678	3.9815
ATX84378-6Ru	1.60258	3.38053	24.7567	0.49471	1.10324	1.48506	333.366	15.9072	26.873	2.854	5.2595	3.29917
ATX84706-2Ru	1.77426	3.62077	23.6337	0.465705	1.06655	1.43544	206.458	21.1747	22.2762	3.70583	5.7245	3.25217
ATX85404-8W	1.98128	4.45933	32.4575	0.53763	1.13659	1.71131	324.194	24.9156	24.5577	6.09234	5.14017	4.46263
ATX87184-2Ru	1.88814	4.08855	26.3722	0.611217	1.11236	1.59361	439.029	20.5377	25.1532	5.3945	5.09833	4.011
ATX9117-1Ru	1.78562	3.52299	25.5843	0.408585	1.15403	1.41793	319.019	17.0832	22.2397	3.434	5.66717	4.12783
ATX9130-1Ru	1.85803	3.56875	23.4659	0.535175	1.23425	1.72328	343.755	23.7788	23.941	4.66733	5.55033	4.46083
ATX91322-2Y/Y	1.69158	4.12197	26.0821	0.788641	0.920184	1.1515	387.084	25.5789	22.2872	3.27444	5.56938	4.92958
ATX9202-3Ru	1.75751	3.41816	22.9918	0.587671	1.10078	1.26472	289.089	17.1774	24.5319	4.67969	5.20213	3.56783
ATX9312-1Ru	1.45243	3.88676	27.7107	0.646673	1.26004	1.30989	314.468	20.5883	27.9579	4.81827	6.29648	3.98582
ATX9332-8Ru	1.41697	3.46302	22.9302	0.610516	1.04866	1.08592	298.223	13.9039	20.3213	2.95832	5.62732	2.88519
ATX97147-4Ru	1.67619	3.66183	23.3292	0.593901	1.17973	1.51877	309.362	16.9973	22.4293	4.50917	5.39533	3.4955
ATX99013-1Ru	1.67548	3.67455	24.8109	0.609148	1.24019	1.35841	418.559	17.2233	20.9905	3.67267	6.02417	3.4895
BTX1544-2W/Y	1.92922	3.81448	25.6874	0.474379	1.3127	1.53647	181.016	22.6103	21.8168	4.82883	7.34917	2.99017
BTX1749-1W/Y	1.81072	3.0903	21.3977	0.349913	1.02535	1.31205	163.241	19.7435	21.1647	4.11733	5.58317	3.30233
BTX2103-1R/Y	2.02919	3.99746	26.1496	0.342759	1.11674	1.48562	235.022	23.3255	23.7257	4.15533	7.30383	4.07867
BTX2332-1R	2.00399	4.04849	28.9805	0.453236	1.24349	1.57721	274.329	26.6948	24.22	4.0845	7.29783	4.0975
CO112-F2-2P/P	1.64802	3.88891	26.5139	0.588833	1.16798	1.23589	410.609	17.8922	24.1118	4.23617	6.205	2.49633
COTX00104-6R	2.01876	4.01303	26.5541	0.550166	1.32069	1.71273	344.362	25.5385	23.5003	4.23817	7.5786	3.8615
COTX00104-7R	1.73282	4.07596	28.1854	0.46663	1.1764	1.51689	302.171	19.1633	23.166	3.96517	6.76567	3.99217
COTX01403-4R/Y	1.95964	3.79031	26.7888	0.31638	1.17785	1.50593	192.596	19.0625	22.6662	3.295	6.2375	3.5725
COTX02172-1R	1.84093	3.54059	22.927	0.360112	1.08708	1.40214	286.598	19.8435	22.8115	2.71767	6.973	3.65867
COTX02293-4R	1.94088	3.54857	25.3134	0.31953	1.14768	1.7004	232.523	20.2425	22.3377	3.47667	6.83783	3.61183
COTX03079-1W/W	1.60719	3.39518	20.6312	0.427424	1.00588	1.16611	161.859	17.524	19.4992	3.92433	4.9575	3.119
COTX03134-1Y/W	1.47222	3.48232	23.8708	0.538518	1.01301	1.23321	298.924	15.9521	19.2054	3.12144	5.27688	3.38158
COTX03187-1W	1.62088	3.30351	22.9131	0.304089	0.939231	1.19082	240.249	18.2262	21.7025	4.729	6.08967	2.1605
COTX04015-3W/Y	1.68854	3.58732	24.9414	0.451663	0.986021	1.32657	228.746	18.7538	20.7478	2.67767	5.12167	2.831
COTX04050s-1P/P	1.88106	3.5146	22.9266	0.380745	0.964756	1.51257	149.308	21.088	21.286	3.915	4.97667	1.967
COTX04193s-2R/Y	1.92951	3.73091	25.5733	0.290998	1.1549	1.4894	207.585	17.768	21.6667	3.17033	6.35517	3.92017
COTX04303-3Ru/Y*	2.02031	3.58527	23.1015	0.70497	1.28566	1.53586	397.236	19.156	23.3403	3.24133	7.70517	3.835
COTX05095-2Ru/Y	1.72686	2.95619	21.981	0.445072	1.12005	1.29262	317.101	13.2227	23.4602	3.03083	6.75367	3.11317
COTX05211-4R	1.86221	3.79937	26.8081	0.431449	1.15255	1.39172	361.285	21.133	22.6827	3.54	6.81133	3.57817
COTX05211-5R	1.91248	3.65086	24.8937	0.405884	1.16097	1.36447	339.893	19.0127	22.7332	3.333	6.75433	3.77933
COTX05211-7R	1.87913	3.65998	24.312	0.37979	1.08392	1.3003	217.267	20.2105	23.5007	3.479	7.46967	3.69233
COTX05249-3W/Y	1.87755	3.88596	23.6024	0.518747	1.1517	1.54838	255.586	20.4742	20.3628	4.165	7.16183	3.27167
COTX05261-1R/Y	1.84042	3.66141	23.949	0.256088	1.11818	1.27419	189.136	19.3275	23.9997	3.31433	7.19567	3.14133
COTX08039-1P/P*	1.95461	3.6848	23.8551	0.351081	1.23007	1.48787	224.846	18.052	21.5658	4.50333	6.60333	3.383
COTX08063-2Ru	1.37304	3.28713	21.7243	0.507695	1.05162	1.192	408.833	16.1892	23.026	3.6085	3.91167	2.93383
COTX08121-1Ru	1.98784	3.93736	23.2355	0.524984	1.30392	1.41887	328.26	19.3362	22.6185	3.80217	6.85617	3.45817
COTX08121-4Ru	1.9101	3.69724	22.3429	0.508109	1.08035	1.32774	319.921	19.7483	22.2902	4.50367	4.84267	2.94483
COTX08258-6Ru	1.83607	3.51045	23.263	0.330236	1.17033	1.43082	375.417	20.344	25.548	4.41067	5.81533	3.96017
COTX08322-10Ru	1.88151	3.43524	22.9592	0.515995	1.12185	1.3199	437.147	19.241	24.6162	3.74867	5.67683	3.75383
COTX08365F-3P/P	2.06642	3.68675	28.0015	0.640481	1.25639	1.52936	299.987	21.3137	23.5538	3.28883	8.361	3.50333
COTX09022-3RuRE/Y	1.63403	3.35015	21.454	0.481945	1.23772	1.36647	338.751	20.5458	25.0122	3.7335	5.588	2.72133
COTX09052-1Ru	1.71408	3.14852	23.5709	0.455055	1.1492	1.37875	325.985	16.4305	22.542	4.85967	5.8385	3.27
COTX09052-2Ru	1.62901	3.29392	22.88	0.554793	1.12479	1.3111	315.128	16.19	22.1352	4.39833	5.2695	3.34883
COTX09089-1Ru	1.68802	3.19062	23.9574	0.479411	1.03115	1.31262	452.112	16.7893	21.9108	3.59283	5.70433	4.07233
COTX10012-1Wrdspl/Y	1.87986	3.62412	24.1055	0.371115	1.09766	1.57961	189.657	20.8537	20.7228	3.8545	6.798	3.1975
COTX10073s-1W	1.80531	3.63041	26.5177	0.448262	1.20847	1.35693	257.451	21.067	19.9907	3.981	6.91233	4.128
COTX10080-2Ru	1.56482	3.75165	25.7843	0.742898	1.1235	1.23019	364.36	19.7978	23.9643	4.45167	6	3.55883
COTX10118-1Wre/Y	1.76292	3.88881	25.8992	0.527721	1.12183	1.50082	363.42	18.0765	22.5937	4.23433	5.91883	3.73333
COTX10118-4Wpe/Y	1.52069	3.72599	25.2354	0.410692	0.942895	1.20969	236.969	19.1132	18.835	3.77967	5.56233	3.242
COTX10138-15Wpe/Y	1.64143	3.38729	26.7125	0.347986	1.09644	1.37567	305.681	18.3057	21.1077	3.3545	5.64133	3.3675
COTX10138-19P/Y	1.61138	3.5981	25.0784	0.266402	0.903217	1.19439	192.794	16.5732	19.979	3.14682	4.58091	2.72812
COTX10138s-7Wpe/Y	1.74947	3.348	23.7342	0.43635	1.16201	1.34906	281.701	18.4285	20.8955	2.9845	7.06283	3.5835
COTX10226-1Wpe/Y	1.86886	3.42783	26.3009	0.479613	1.1853	1.42932	239.284	24.3348	21.1652	2.93083	6.299	3.83567
COTX13215-2Ru	1.9124	3.86327	24.8153	0.449862	1.14182	1.53553	355.024	19.6168	25.385	4.33633	5.75883	3.77017
COTX87601-2Ru	1.84349	4.01346	26.3762	0.572632	1.24854	1.3398	345.406	20.7727	23.3913	4.43767	7.69567	3.7855
COTX89044-1Ru	2.01425	3.76829	23.8954	0.498715	1.04291	1.40964	307.505	21.3213	22.902	4.5035	5.89033	2.98083
COTX90046-1W	1.71964	3.70145	26.938	0.284897	1.04133	1.2313	200.918	21.0177	23.7955	3.9485	5.62067	3.17233
COTX90046-5W	1.69089	3.42092	23.8136	0.330157	0.934712	1.18762	311.398	17.3883	22.8493	4.10033	4.30983	3.02067
COTX94216-1R	2.20205	3.97507	27.1757	0.449331	1.24547	1.69544	287.489	24.6715	21.6375	3.84383	7.46783	3.77967
COTX94218-1R	2.02596	4.30782	30.9765	0.420012	1.22377	1.63661	352.326	23.924	24.6243	4.86317	6.71133	4.56483
JTTX75/2003EH-1Yre/Y	1.86373	3.52193	24.6202	0.43774	1.16784	1.36986	241.275	16.3452	19.6455	2.971	7.561	3.19983
Krantz	1.68069	3.26455	21.4322	0.567458	1.09308	1.25699	193.266	18.6194	21.4158	3.96275	6.47459	3.27236
MWTX2609-2Ru	1.71496	3.67446	24.5398	0.608719	1.10705	1.43324	348.038	18.3732	25.7458	4.07167	5.08733	3.48417
MWTX2609-4Ru	1.52634	3.86103	25.6692	0.638169	1.08877	1.37181	414.085	17.6032	23.9245	3.90117	4.9345	4.03617
MWTX548-2Ru	1.75491	3.45331	23.4749	0.633681	1.00561	1.39322	324.021	18.081	25.3468	3.231	4.63933	3.621
NDTX050169-1R	2.29491	4.45923	30.6457	0.530889	1.43855	1.8374	357.922	27.0367	27.6982	4.42783	7.8645	4.97767
NDTX050184s-1R/Y	1.94292	4.22398	28.9917	0.560332	1.26593	1.62355	292.001	22.5233	24.955	5.24	5.91233	4.39167
NDTX059759-3R/Y Pinto	1.81876	4.12435	28.1914	0.420067	1.13849	1.38317	233.355	21.384	25.7808	4.39917	7.25733	4.37517
NDTX059761-1R/R	1.92488	3.83981	27.4629	0.494634	1.14518	1.55172	278.332	22.022	24.7415	4.11883	6.1805	3.761
NDTX059775-1W	1.8134	3.98907	26.5245	0.412718	1.10483	1.39159	209.517	20.483	19.664	4.24933	6.15817	3.5475
NDTX059828-2W	2.11707	3.86589	27.7628	0.271312	1.17952	1.54566	219.176	23.5865	22.5287	3.308	7.19583	2.71667
NDTX059886S-1Y/Y	1.81235	3.37831	22.4167	0.374884	1.14773	1.35882	182.007	19.4488	22.6543	3.16567	8.06583	3.29883
NDTX060700C-1W	1.83196	3.36585	23.4846	0.22577	1.0038	1.36906	172.97	22.7997	20.8443	4.28933	5.85217	2.4015
NDTX071109C-1W	1.84884	3.55872	26.425	0.348739	1.17841	1.41447	177.303	18.6498	23.4447	3.76833	6.90867	2.90733
NDTX071217CB-1W/Y	2.05838	3.6573	25.4309	0.39616	1.26708	1.44491	211.488	18.8527	21.5733	3.18633	7.42067	3.377
NDTX071258B-1R	1.79588	3.78205	26.8172	0.347843	1.28065	1.47263	224.186	21.674	23.2432	2.71633	8.67776	3.34533
NDTX081451CBs-1Y/Y	1.58355	3.10927	23.3536	0.351643	1.03041	1.35137	183.057	18.0757	20.3323	4.12933	5.33367	3.36383
NDTX081618-1P/P	1.94997	3.55042	25.9676	0.32268	1.25744	1.50618	258.673	18.3993	19.1545	3.48467	7.15533	1.99483
NDTX081644-CAB-2W	2.03934	3.61854	27.7907	0.188001	1.37067	1.40082	190.352	20.782	24.0005	3.92333	6.4685	3.41767
NDTX081648CB-13W	1.7191	3.32263	25.804	0.306658	0.975309	1.30699	258.966	14.9282	20.9068	3.867	4.777	3.2305
NDTX081648CB-1W	1.8647	3.48713	25.7191	0.34959	1.01038	1.27054	234.416	14.313	21.594	4.00617	6.20433	2.49517
NDTX081648CB-4W	1.98829	3.61539	27.39	0.348436	1.05202	1.34845	213.202	14.127	22.19	4.25367	6.01183	2.60767
NDTX091886-3P/P	1.79108	3.53051	27.3851	0.263487	0.996715	1.24931	239.175	18.5047	20.8762	3.41783	4.8165	1.892
NDTX091908AB-2W	1.7605	3.33299	26.6337	0.307397	1.14676	1.37904	161.113	21.6853	21.822	3.95967	6.374	2.744
NDTX092237C-2P/W	1.88626	3.6893	25.2993	0.508773	1.13333	1.37828	193.003	20.584	23.5165	3.4955	5.64583	2.76533
NDTX092238Cs-1P/W	1.8689	3.54369	25.6137	0.263403	1.32564	1.48584	174.997	20.1852	23.2543	2.85	6.4855	3.06067
NDTX4271-5R	1.79518	3.24004	24.3693	0.404309	1.20865	1.53817	211.58	20.642	26.3313	3.423	6.15367	3.67533
NDTX4756-1R/Y	1.94175	3.72511	25.8876	0.216281	1.13039	1.46404	191.697	16.5688	23.7433	3.651	6.15717	3.58783
NDTX4784-7R	1.65402	3.35527	23.509	0.296313	1.10686	1.45338	244.995	17.814	23.63	2.6015	6.6345	3.78517
NDTX4828-2R	1.88835	3.7442	25.667	0.391405	1.28883	1.51679	250.278	20.2497	24.638	3.64833	8.92367	4.55783
NDTX4930-5W	1.92449	3.68474	25.3027	0.283296	1.16863	1.37577	157.341	19.8972	23.2108	3.87317	6.0675	2.78133
NDTX5003-2R	1.77857	3.45662	25.4348	0.343673	1.09808	1.40143	393.813	16.6213	23.7858	2.44573	5.62712	2.91631
NDTX5067-2R	1.96958	3.70845	25.4531	0.312984	1.15759	1.54888	305.822	20.5315	22.9752	3.46433	6.173	3.43583
NDTX5438-11R	2.06802	4.78903	28.4776	0.605841	1.20466	1.71242	359.798	24.1088	22.0255	3.99017	6.66367	3.42217
NDTX6773-1W	1.95764	4.01474	29.1252	0.331072	1.09816	1.47713	199.164	21.7608	21.916	3.7265	4.9385	3.41733
NDTX731-1R	1.93266	3.67485	25.6171	0.35235	1.21114	1.46892	235.766	20.9697	24.017	3.67983	5.56683	3.742
NDTX7590-3R	1.90678	3.61039	22.9494	0.428234	1.00866	1.43999	230.238	18.1088	24.8472	3.37517	6.01683	2.944
NDTX8773-4Ru	1.78986	3.71475	22.0584	0.571418	1.27626	1.43211	267.54	20.3743	25.356	5.67383	5.84633	3.06467
NDTX91068-11R	1.8348	3.85217	28.4374	0.404765	1.11171	1.47442	238.166	23.9572	25.5512	3.96667	6.607	3.55817
PORTX03PG25-2R/R	2.08036	4.05273	29.1888	0.371378	1.15509	1.49583	185.585	26.4862	24.3972	3.53433	7.349	3.45183
PTTX05PG07-1W	1.66702	3.36624	22.3802	0.24274	0.995559	1.28101	194.843	17.6932	23.4815	2.9135	5.4035	2.232
Reveille Russet	1.70351	3.48432	22.8303	0.502726	1.21433	1.39213	468.463	19.2013	24.8468	3.9735	6.03933	3.89733
Rio Rojo	1.72856	3.69237	24.6967	0.342027	1.1948	1.3239	248.116	19.6677	21.1363	3.4585	5.77633	3.3735
Russet Burbank	1.51086	3.79906	26.8123	0.68481	1.11489	1.31334	459.022	16.9265	21.489	4.06333	5.92117	2.83567
Russet Norkotah	1.85892	3.42409	22.885	0.641663	1.25497	1.43212	346.534	18.3645	24.6892	3.02767	7.07133	2.98167
Russet Norkotah 102	1.78275	3.94654	25.5533	0.683109	1.27953	1.4039	396.395	18.7323	23.8593	3.93317	7.21517	3.11817
Russet Norkotah 112	1.87834	3.89411	24.6111	0.581671	1.25983	1.38307	371.185	17.2745	24.688	3.92533	6.35083	3.23267
Russet Norkotah 223	1.69229	3.40156	21.6394	0.605749	1.15921	1.2365	331.613	15.3797	20.6955	3.29494	6.27672	2.95703
Russet Norkotah 278	1.77293	3.85397	24.3054	0.623794	1.24347	1.32517	437.498	16.5773	24.2967	3.80933	6.39383	3.34083
Russet Norkotah 296	1.80059	3.75163	24.0467	0.568637	1.26502	1.4064	363.509	16.7635	22.365	3.32233	7.00217	2.80717
Sierra GoldTM	1.6706	3.158	21.2119	0.528074	1.00439	1.24028	200.158	15.9073	24.2218	3.013	5.21233	3.2755
Sierra RoseTM	1.7914	3.35521	23.3419	0.289359	1.07863	1.25732	209.985	18.125	23.4852	3.2975	6.352	3.40417
Stampede Russet	1.65916	3.51542	23.8522	0.343138	1.19767	1.41987	314.261	16.78	24.668	2.15933	8.8035	3.38633
Tacna	1.75275	3.83787	31.8892	0.77875	1.07679	1.32334	280.907	22.244	18.7172	6.10193	5.59127	3.61401
Tokio	1.72318	3.69621	25.5122	0.374725	1.01178	1.2949	295.049	20.0412	19.9478	4.65233	5.11983	3.26867
TX03196-1W	2.22135	3.62653	25.1648	0.260709	1.22335	1.61778	184.518	24.7675	23.269	4.612	7.2515	3.13033
TX05249-10W	2.09758	4.11799	25.5265	0.335594	1.25134	1.50393	157.622	20.615	23.6818	5.393	6.054	2.62983
TX05249-11W	1.88315	3.69656	27.1423	0.315994	0.972191	1.39352	215.142	22.7128	22.5385	5.22867	6.30783	3.18717
TX05249-3W	2.12408	4.04728	27.8774	0.312304	1.07951	1.40976	196.737	21.5633	24.5462	4.04233	7.921	3.46767
TX08350-12Ru	1.79555	3.45973	20.3886	0.429716	1.14951	1.29824	334.292	19.2328	23.0203	2.9915	6.16717	2.64117
TX08385-2P/YP	1.77406	3.47754	25.2901	0.381779	1.10832	1.51727	102.499	18.3887	22.6132	3.37958	5.162	1.88617
TX09396-1W	1.80971	3.68382	28.3779	0.27598	1.00731	1.22305	187.808	19.6998	24.13	3.607	4.24633	3.2915
TX09403-15W	1.97519	3.57608	25.6979	0.24392	1.1603	1.43727	190.089	17.5293	24.855	2.899	5.526	3.339
TX09403-21W	1.8527	3.79213	25.401	0.236548	1.07605	1.42617	187.34	18.7143	22.6425	2.97867	5.02583	3.3015
TX09414-1W	1.91938	4.22376	28.223	0.458933	1.0417	1.48237	358.276	21.5022	22.2763	4.99367	4.43183	3.4945
TX10437-9Pyspl/Y	2.32865	4.78127	25.8786	0.569434	1.28134	1.86361	244.864	23.6871	19.0562	4.89152	5.31773	4.48402
TX11454-9Ru/Y	1.7464	3.41854	21.9464	0.590357	1.17232	1.3503	311.074	16.3322	22.4437	3.5615	6.16333	2.85483
TX11461-2W	2.00709	3.8933	27.6585	0.289551	1.13703	1.50461	229.644	19.8517	22.2675	3.63433	6.43283	2.86517
TX11461-3W	1.8598	3.62592	24.7849	0.289577	0.914114	1.41192	249.657	20.9217	20.878	3.82767	4.29633	2.58817
TX12474-1P/R	1.95394	4.03743	28.8657	0.608102	1.2681	1.52363	264.517	20.6123	24.9215	3.2625	6.892	3.41433
TX12484-4W	1.7952	3.39042	26.1097	0.27194	0.963403	1.34695	256.907	20.934	22.8475	3.4205	5.28867	2.558
TX13590-9Ru	1.54513	3.43511	21.3802	0.58695	1.03578	1.15346	358.406	15.9303	22.8897	3.09683	4.5325	2.46683
TX14611-1R	1.59471	4.07638	25.8813	0.461772	1.10796	1.43728	326.662	27.9267	24.4373	5.173	6.3165	3.94733
TX1475-3W	2.05827	3.78151	24.5133	0.278562	1.12554	1.41676	218.542	22.6226	23.1745	4.25074	5.93377	2.62882
TX1617-1W/Y	1.75143	3.70708	24.7837	0.454343	1.15954	1.35451	185.002	14.9145	20.2907	3.42048	5.7146	3.13333
TX1673-1W/Y	1.82347	3.39768	24.073	0.394016	1.07432	1.33199	159.067	17.4012	21.0977	3.743	5.0625	3.17417
TX6-1216-1Ru	1.9057	3.67552	23.4586	0.62258	1.22985	1.4313	290.95	19.7161	24.7451	3.76658	6.26844	2.84036
TXA549-1Ru	1.71501	3.63588	20.7413	0.586074	1.10167	1.33045	314.241	18.054	22.3387	3.302	5.16	2.8825
TXNS106	1.66511	3.75344	23.8627	0.589003	1.26968	1.31724	340.814	17.9633	27.6342	3.46337	7.14377	3.0971
TXNS118	1.80066	3.65037	23.4641	0.633321	1.15883	1.3235	346.983	15.8965	23.5662	3.29333	6.7405	2.67917
TXNS249	1.94506	3.35788	21.8705	0.478096	1.24636	1.38038	324.784	16.0837	24.96	3.16983	7.15733	2.97683
TXYG79	1.84419	3.60129	23.4466	0.398318	1.10206	1.41828	200.595	18.243	19.3105	3.00817	5.55567	2.9075
UMTX383-3Yrdspl/Y	1.7293	4.09282	27.9031	0.497878	1.11927	1.47578	241.461	19.8073	21.0378	4.0385	6.2485	3.07133
Vanguard Russet	1.78266	3.72674	21.9863	0.554898	1.27085	1.29345	372.508	18.6198	23.554	2.77183	6.79583	3.375
White LaSoda	1.92112	3.79138	26.2976	0.348299	1.14967	1.5175	283.326	22.8073	24.1517	5.27317	5.729	4.381
