# Supplementary material for: Variation and genetic basis of mineral content in potato tubers and prospects for genomic selection
Source: Front Plant Sci. 2023 Dec 22;14:1301297. doi: 10.3389/fpls.2023.1301297 (PMC10766833; doi:10.3389/fpls.2023.1301297)
Supplement: Supplementary file 4 [file Table_3.xlsx]

## Sheet: Sheet1
Supplementary Table 3: Analysis of variance assessing the effect of (A) environments (Env), (B) locations (Loc), and (C) years on the mineral contents in 214 tetraploid advanced potato genotypes evaluated in Texas.
(A) Three environments (Dalhart 2019, 2020 and Springlake 2020)
Source of variation	N	P	K	Ca	Mg	Na	Zn	Fe	Cu	Mn	S	B
Genotype	***	***	***	***	***	***	***	ns	***	***	***	***
Env	ns	ns	ns	ns	ns	ns	ns	ns	ns	ns	ns	ns
Rep(Env)	ns	ns	ns	ns	ns	ns	ns	ns	ns	ns	ns	ns
Genotype x Env	***	ns	ns	ns	**	***	***	ns	ns	***	***	***
(B) Two location and one year (Dalhart 2020, Springlake 2020)
Source of variation	N	P	K	Ca	Mg	Na	Zn	Fe	Cu	Mn	S	B
Genotype	***	***	***	***	***	***	***	ns	***	***	***	***
Loc	ns	**	ns	ns	ns	*	*	ns	ns	ns	ns	ns
Rep(Loc)	ns	ns	ns	ns	ns	ns	ns	ns	ns	ns	ns	ns
Genotype x Loc	***	*	*	**	**	***	**	ns	**	***	**	ns
(C) Two years and one location (Dalhart 2019, Dalhart 2020)
Source of variation	N	P	K	Ca	Mg	Na	Zn	Fe	Cu	Mn	S	B
Genotype	**	***	***	*	***	*	***	ns	***	***	***	**
Year	ns	ns	ns	ns	ns	ns	ns	ns	ns	ns	ns	ns
Rep(Year)	ns	ns	ns	ns	ns	ns	ns	ns	ns	ns	ns	ns
Genotype x Year	ns	ns	ns	**	*	**	**	ns	ns	***	*	***
ns - not significant; * p < 0.05; ** p < 0.01; and *** p < 0.001
