# Supplementary material for: Variation and genetic basis of mineral content in potato tubers and prospects for genomic selection
Source: Front Plant Sci. 2023 Dec 22;14:1301297. doi: 10.3389/fpls.2023.1301297 (PMC10766833; doi:10.3389/fpls.2023.1301297)
Supplement: Supplementary file 5 [file Table_4.xlsx]

## Sheet: Sheet1
Supplementary Table 4: Pearson correlations (r) between minerals and yield related traits evaluated in Dalhart, Texas in 2019 and 2020, and Springlake, Texas in 2020.
Traits/Minerals	N	P	K	Ca	Mg	S	Na	Zn	Fe	Cu	Mn	B
Av. tuber weight per plant	-0.0847	-0.1644	-0.2231	0.0462	-0.0421	-0.0162	-0.0121	-0.1519	0.0883	-0.0271	-0.1647	0.0548
Av. weight per tuber	-0.2327	-0.2522	-0.3853	0.4308	0.1051	-0.1647	0.3297	-0.3458	0.2413	-0.1237	-0.1388	-0.0923
Av. tuber no per plant	0.1788	0.1888	0.2738	-0.356	-0.1059	0.2114	-0.337	0.2864	-0.193	0.0892	0.045	0.1869
Tuber shape†	-0.3085	-0.2434	-0.4498	0.5609	0.1613	-0.2747	0.4769	-0.3878	0.2097	-0.1644	-0.0008	-0.2041
Bold values are significant at p<0.001; †Tuber shape 1 = round to 5 = long
