# Supplementary material for: Variation and genetic basis of mineral content in potato tubers and prospects for genomic selection
Source: Front Plant Sci. 2023 Dec 22;14:1301297. doi: 10.3389/fpls.2023.1301297 (PMC10766833; doi:10.3389/fpls.2023.1301297)
Supplement: Supplementary file 6 [file Table_5.xlsx]

## Sheet: K candidate genes
Supplementary Table 5: The genes retrieved from the potato reference genome to find possible candidate genes from the QTL's genomic regions spanning upto 5 Mbp for K.
chr	start	end	mid	ID	Name	hit_dist
ch05	4484319	4492247	4488283	ID=PGSC0003DMG400018405	name=Transferase, transferring glycosyl groups	137
ch05	4489996	4494218	4492107	ID=PGSC0003DMG401018424	name=Chalcone reductase	3687
ch05	4493546	4494218	4493882	ID=PGSC0003DMG402018424	name=Chalcone reductase	5462
ch05	4494619	4496066	4.49534e+06	ID=PGSC0003DMG400040190	name=Conserved gene of unknown function	6922.5
ch05	4497112	4497764	4497438	ID=PGSC0003DMG400018406	name=Gene of unknown function	9018
ch05	4500286	4502395	4.50134e+06	ID=PGSC0003DMG400018425	name=50S ribosomal protein L18, chloroplast	12920.5
ch05	4503891	4504713	4504302	ID=PGSC0003DMG400018407	name=Zinc finger protein	15882
ch05	4507254	4509337	4.5083e+06	ID=PGSC0003DMG400018426	name=Transcription factor	19875.5
ch05	4437166	4448643	4.4429e+06	ID=PGSC0003DMG400018403	name=Axi 1 protein	45515.5
ch05	4538880	4541736	4540308	ID=PGSC0003DMG400018408	name=Zinc finger protein	51888
ch05	4431043	4435486	4.43326e+06	ID=PGSC0003DMG400018423	name=Phytanoyl-CoA dioxygenase domain containing	55155.5
ch05	4548155	4550928	4.54954e+06	ID=PGSC0003DMG400018427	name=R2r3-myb transcription factor	61121.5
ch05	4417126	4421492	4419309	ID=PGSC0003DMG400018422	name=Sulfate/bicarbonate/oxalate exchanger and transporter sat-1	69111
ch05	4410836	4412458	4411647	ID=PGSC0003DMG403018402	name=Uridine cytidine kinase I	76773
ch05	4403608	4409035	4.40632e+06	ID=PGSC0003DMG402018402	name=Uridine cytidine kinase I	82098.5
ch05	4401096	4402439	4.40177e+06	ID=PGSC0003DMG401018402	name=Gene of unknown function	86652.5
ch05	4589149	4595717	4592433	ID=PGSC0003DMG400018428	name=Bacterial spot disease resistance protein 4	104013
ch05	4598814	4599887	4.59935e+06	ID=PGSC0003DMG400018453	name=MTERF domain containing protein	110930
ch05	4611906	4618405	4.61516e+06	ID=PGSC0003DMG400018429	name=Bacterial spot disease resistance protein 4	126736
ch05	4619221	4621397	4620309	ID=PGSC0003DMG400018430	name=MTERF domain containing protein	131889
ch05	4627876	4630459	4.62917e+06	ID=PGSC0003DMG400018431	name=Alpha-expansin 1	140748
ch05	4334961	4338096	4.33653e+06	ID=PGSC0003DMG400030491	name=(Di)nucleoside polyphosphate hydrolase	151892
ch05	4332002	4334879	4.33344e+06	ID=PGSC0003DMG400030537	name=60S ribosomal protein L31	154980
ch05	4646713	4648137	4647425	ID=PGSC0003DMG400018454	name=Conserved gene of unknown function	159005
ch05	4324472	4327488	4325980	ID=PGSC0003DMG400030492	name=Big map kinase/bmk	162440
ch05	4653568	4653941	4.65375e+06	ID=PGSC0003DMG400018455	name=Transposon protein	165334
ch05	4314410	4315747	4.31508e+06	ID=PGSC0003DMG400030538	name=F-box domain containing protein	173342
ch05	4303682	4304965	4.30432e+06	ID=PGSC0003DMG400046724	name=Ubiquitin-protein ligase	184096
ch05	4669790	4678090	4673940	ID=PGSC0003DMG400018432	name=Mandelonitrile lyase	185520
ch05	4294312	4296523	4.29542e+06	ID=PGSC0003DMG400030539	name=Gene of unknown function	193002
ch05	4293665	4294010	4.29384e+06	ID=PGSC0003DMG401030493	name=ATP-dependent helicase	194582
ch05	4684512	4691819	4.68817e+06	ID=PGSC0003DMG400018409	name=KH domain containing protein	199746
ch05	4692608	4695867	4.69424e+06	ID=PGSC0003DMG400018433	name=Negatively light-regulated protein	205818
ch05	4277263	4279804	4.27853e+06	ID=PGSC0003DMG402030493	name=ATP-dependent helicase	209886
ch05	4699856	4700602	4700229	ID=PGSC0003DMG400018410	name=UPF0497 membrane protein 1	211809
ch05	4699656	4701752	4700704	ID=PGSC0003DMG400018434	name=Oxygen evolving enhancer protein 3	212284
ch05	4707940	4709908	4708924	ID=PGSC0003DMG400018435	name=NAC domain protein NAC2	220504
ch05	4264483	4267821	4266152	ID=PGSC0003DMG400030494	name=Homeobox protein	222268
ch05	4715987	4718061	4717024	ID=PGSC0003DMG400018436	name=TPR domain containing protein	228604
ch05	4718570	4727982	4723276	ID=PGSC0003DMG400018437	name=Anaphase promoting complex protein	234856
ch05	4249578	4253275	4.25143e+06	ID=PGSC0003DMG400030495	name=Auxin efflux carrier	236994
ch05	4728892	4733804	4731348	ID=PGSC0003DMG400018438	name=Pentatricopeptide repeat-containing protein	242928
ch05	4734615	4737869	4736242	ID=PGSC0003DMG400018411	name=Mitochondrial carrier protein	247822
ch05	4232470	4235213	4.23384e+06	ID=PGSC0003DMG400030496	name=Disease resistance protein	254578
ch05	4227604	4230353	4.22898e+06	ID=PGSC0003DMG400030497	name=Resistance protein PSH-RGH6	259442
ch05	4749905	4752350	4.75113e+06	ID=PGSC0003DMG400018412	name=Transcription factor	262708
ch05	4223105	4227103	4225104	ID=PGSC0003DMG400030498	name=Disease resistance protein BS2	263316
ch05	4214921	4217715	4216318	ID=PGSC0003DMG401030499	name=Aquaporin, MIP family, NIP subfamily	272102
ch05	4764169	4766317	4765243	ID=PGSC0003DMG400018439	name=Transcription factor	276823
ch05	4200982	4206287	4.20363e+06	ID=PGSC0003DMG402030499	name=Conserved gene of unknown function	284786
ch05	4776012	4777644	4776828	ID=PGSC0003DMG400018440	name=Conserved gene of unknown function	288408
ch05	4196446	4197088	4196767	ID=PGSC0003DMG400030540	name=Extensin	291653
ch05	4780196	4785772	4782984	ID=PGSC0003DMG400018413	name=Adenosine diphosphatase	294564
ch05	4786918	4792370	4789644	ID=PGSC0003DMG400018414	name=Membrane associated ring finger 1,8	301224
ch05	4183574	4184678	4184126	ID=PGSC0003DMG400030541	name=Nutrient reservoir	304294
ch05	4179591	4181677	4180634	ID=PGSC0003DMG400030542	name=Heat shock protein binding protein	307786
ch05	4796347	4796888	4.79662e+06	ID=PGSC0003DMG400018456	name=Conserved gene of unknown function	308198
ch05	4799612	4804074	4801843	ID=PGSC0003DMG400018441	name=Late blight resistance protein	313423
ch05	4173679	4174911	4174295	ID=PGSC0003DMG400030500	name=Conserved gene of unknown function	314125
ch05	4169120	4173221	4.17117e+06	ID=PGSC0003DMG400030543	name=Gene of unknown function	317250
ch05	4839966	4843837	4.8419e+06	ID=PGSC0003DMG400018442	name=Late blight resistance protein	353482
ch05	4111951	4118400	4.11518e+06	ID=PGSC0003DMG400030501	name=Quinolinate phosphirobosyltransferase	373244
ch05	4107529	4113266	4.1104e+06	ID=PGSC0003DMG400030544	name=WD-repeat protein	378022
ch05	4097590	4098620	4098105	ID=PGSC0003DMG400030582	name=Gene of unknown function	390315
ch05	4088794	4097482	4093138	ID=PGSC0003DMG400030502	name=Fyve finger-containing phosphoinositide kinase, fyv1	395282
ch05	4083569	4086820	4.08519e+06	ID=PGSC0003DMG400030546	name=Conserved gene of unknown function	403226
ch05	4903471	4905188	4.90433e+06	ID=PGSC0003DMG400031265	name=Late blight resistance protein	415910
ch05	4905822	4907489	4.90666e+06	ID=PGSC0003DMG400031255	name=Isopenicillin N epimerase	418236
ch05	4068242	4070295	4.06927e+06	ID=PGSC0003DMG400030503	name=Conserved gene of unknown function	419152
ch05	4062234	4063922	4063078	ID=PGSC0003DMG400030504	name=Conserved gene of unknown function	425342
ch05	4055474	4059978	4057726	ID=PGSC0003DMG400030547	name=E3 ubiquitin ligase PUB14	430694
ch05	4920888	4922194	4921541	ID=PGSC0003DMG400031256	name=ZF-HD homeobox protein	433121
ch05	4046634	4053740	4050187	ID=PGSC0003DMG400030548	name=Myb-like transcription factor 6	438233
ch05	4932909	4937289	4935099	ID=PGSC0003DMG400031257	name=60S ribosomal protein L34	446679
ch05	4033954	4042260	4038107	ID=PGSC0003DMG400030549	name=Conserved gene of unknown function	450313
ch05	4941333	4944072	4.9427e+06	ID=PGSC0003DMG400031258	name=60S ribosomal protein L34	454282
ch05	4946134	4948792	4947463	ID=PGSC0003DMG400031266	name=No apical meristem (NAM)	459043
ch05	4025454	4033006	4029230	ID=PGSC0003DMG400030550	name=Conserved gene of unknown function	459190
ch05	4016212	4017445	4.01683e+06	ID=PGSC0003DMG400030505	name=Conserved gene of unknown function	471592
ch05	4009033	4012803	4010918	ID=PGSC0003DMG400030551	name=Spore coat protein	477502
ch05	4967598	4969979	4.96879e+06	ID=PGSC0003DMG400031259	name=F-box domain-containing protein	480368
ch05	4975994	4977018	4976506	ID=PGSC0003DMG400031274	name=S haplotype-specific F-box protein	488086
ch05	4973807	4980927	4977367	ID=PGSC0003DMG400031267	name=Conserved gene of unknown function	488947
ch05	4977721	4978290	4.97801e+06	ID=PGSC0003DMG400031276	name=F-box domain-containing protein	489586
ch05	4978583	4979734	4.97916e+06	ID=PGSC0003DMG400031277	name=F-box domain-containing protein	490738
ch05	4980507	4987435	4983971	ID=PGSC0003DMG401031260	name=F-Box protein	495551
ch05	3991348	3993998	3992673	ID=PGSC0003DMG400030552	name=Chloroplast-targeted copper chaperone	495747
ch05	4984440	4989957	4.9872e+06	ID=PGSC0003DMG402031260	name=F-box domain-containing protein	498778
ch05	4990055	4990765	4990410	ID=PGSC0003DMG400031278	name=F-box protein	501990
ch05	4991960	4994024	4992992	ID=PGSC0003DMG400031279	name=F-box domain-containing protein	504572
ch05	3975677	3980357	3978017	ID=PGSC0003DMG400030553	name=ATP binding / protein kinase/ protein serine/threonine kinase/ protein tyrosine kinase/ sugar binding	510403
ch05	4996710	5005282	5000996	ID=PGSC0003DMG400031269	name=RNA-dependent RNA-polymerase	512576
ch05	3969058	3970107	3.96958e+06	ID=PGSC0003DMG400030506	name=FLA20	518838
ch05	3966729	3968667	3967698	ID=PGSC0003DMG400030554	name=Pentatricopeptide repeat protein	520722
ch05	3960120	3964565	3.96234e+06	ID=PGSC0003DMG400030555	name=Acetylglucosaminyltransferase	526078
ch05	3945081	3955925	3950503	ID=PGSC0003DMG400030507	name=Abc transporter	537917
ch05	3943033	3943669	3943351	ID=PGSC0003DMG400030508	name=By genscan and genefinder	545069
ch05	5028894	5038966	5033930	ID=PGSC0003DMG400031261	name=RNA-dependent RNA-polymerase	545510
ch05	5039619	5044371	5041995	ID=PGSC0003DMG400031270	name=CAAX amino terminal protease	553575
ch05	3927363	3930287	3928825	ID=PGSC0003DMG400030509	name=Ribose-5-phosphate isomerase	559595
ch05	5049910	5056150	5053030	ID=PGSC0003DMG400031262	name=Methyltransferase	564610
ch05	5058102	5059811	5.05896e+06	ID=PGSC0003DMG400031263	name=Phytochrome kinase substrate 1	570536
ch05	5067835	5069682	5.06876e+06	ID=PGSC0003DMG400031271	name=AAA ATPase	580338
ch05	3903471	3909624	3.90655e+06	ID=PGSC0003DMG400030510	name=Conserved gene of unknown function	581872
ch05	3897559	3898635	3898097	ID=PGSC0003DMG400030556	name=Gene of unknown function	590323
ch05	5091757	5094106	5.09293e+06	ID=PGSC0003DMG400038012	name=Gag-pol protein	604512
ch05	3872716	3876866	3874791	ID=PGSC0003DMG400030557	name=Membrane associated ring finger 1,8	613629
ch05	3855942	3861025	3.85848e+06	ID=PGSC0003DMG400030511	name=Repressor of RNA polymerase III transcription MAF1	629936
ch05	3846875	3847435	3847155	ID=PGSC0003DMG400035916	name=Conserved gene of unknown function	641265
ch05	3826477	3835460	3.83097e+06	ID=PGSC0003DMG400030558	name=ALG2-interacting protein X	657452
ch05	3819129	3825291	3822210	ID=PGSC0003DMG400030513	name=Sarcoplasmic reticulum histidine-rich calcium-binding protein	666210
ch05	5153408	5158388	5155898	ID=PGSC0003DMG400025543	name=Gene of unknown function	667478
ch05	3812966	3817781	3.81537e+06	ID=PGSC0003DMG400030559	name=Fruit protein PKIWI502	673046
ch05	5162953	5167482	5.16522e+06	ID=PGSC0003DMG400025547	name=Late blight resistance protein	676798
ch05	3808243	3812259	3810251	ID=PGSC0003DMG400030560	name=ATP synthase subunit beta	678169
ch05	3804570	3804947	3.80476e+06	ID=PGSC0003DMG400042076	name=Gene of unknown function	683662
ch05	3800502	3803746	3802124	ID=PGSC0003DMG400030561	name=HB06p	686296
ch05	3794799	3797561	3796180	ID=PGSC0003DMG400030514	name=Histone chaperone ASF1A	692240
ch05	3789768	3794056	3791912	ID=PGSC0003DMG400030562	name=Cement protein 3B variant 1	696508
ch05	3781778	3786369	3.78407e+06	ID=PGSC0003DMG401030515	name=TRANSPARENT TESTA 12 protein	704346
ch05	3775904	3779888	3777896	ID=PGSC0003DMG402030515	name=TRANSPARENT TESTA 12 protein	710524
ch05	5201163	5201661	5201412	ID=PGSC0003DMG400025548	name=Small nuclear ribonucleoprotein polypeptide	712992
ch05	5202881	5206529	5204705	ID=PGSC0003DMG402025549	name=Protein SUR2	716285
ch05	3769255	3774711	3771983	ID=PGSC0003DMG400030516	name=Conserved gene of unknown function	716437
ch05	3762886	3769061	3.76597e+06	ID=PGSC0003DMG400030563	name=TatC	722446
ch05	5211402	5215554	5213478	ID=PGSC0003DMG400025545	name=Late blight resistance protein homolog R1B-23	725058
ch05	5215643	5216439	5216041	ID=PGSC0003DMG400025553	name=Late blight resistance protein	727621
ch05	5216489	5219344	5.21792e+06	ID=PGSC0003DMG401025549	name=Sterol desaturase	729496
ch05	3753789	3760824	3.75731e+06	ID=PGSC0003DMG401030517	name=Origin recognition complex 4 subunit	731114
ch05	3743052	3750579	3.74682e+06	ID=PGSC0003DMG402030517	name=Pentatricopeptide repeat-containing protein	741604
ch05	5231245	5232181	5231713	ID=PGSC0003DMG400025550	name=Protein SUR2	743293
ch05	3737058	3740525	3.73879e+06	ID=PGSC0003DMG400037693	name=Palmitoyl-acyl carrier protein thioesterase	749628
ch05	5238827	5239683	5239255	ID=PGSC0003DMG400025546	name=Disease resistance protein	750835
ch05	3728959	3735721	3732340	ID=PGSC0003DMG400030564	name=Phosphatidylserine synthase	756080
ch05	3710910	3715061	3.71299e+06	ID=PGSC0003DMG400030518	name=Conserved gene of unknown function	775434
ch05	3707278	3710672	3708975	ID=PGSC0003DMG400030565	name=Fructose-bisphosphate aldolase	779445
ch05	3699270	3705807	3.70254e+06	ID=PGSC0003DMG400030519	name=Oxidoreductase	785882
ch05	3694620	3698847	3.69673e+06	ID=PGSC0003DMG400030566	name=Conserved gene of unknown function	791686
ch05	3683105	3692228	3.68767e+06	ID=PGSC0003DMG400030520	name=Poly(A) polymerase alpha	800754
ch05	3667660	3668383	3.66802e+06	ID=PGSC0003DMG400030521	name=E3 ubiquitin-protein ligase RHA2A	820398
ch05	3663883	3666578	3.66523e+06	ID=PGSC0003DMG400030567	name=Zinc finger protein	823190
ch05	5317990	5322196	5320093	ID=PGSC0003DMG400037333	name=Late blight resistance protein homolog R1C-3	831673
ch05	3655452	3656432	3655942	ID=PGSC0003DMG400043233	name=S-adenosyl-methionine-sterol-C-methyltransferase homolog	832478
ch05	3646347	3653379	3649863	ID=PGSC0003DMG400030522	name=Late blight resistance protein	838557
ch05	3645683	3646111	3645897	ID=PGSC0003DMG400047260	name=Claspin	842523
ch05	5340403	5341296	5.34085e+06	ID=PGSC0003DMG400003383	name=Protein SUR2	852430
ch05	3634301	3635059	3634680	ID=PGSC0003DMG400045836	name=FAD-dependent oxidoreductase domain containing 2	853740
ch05	3633504	3633824	3633664	ID=PGSC0003DMG400041500	name=Conserved gene of unknown function	854756
ch05	3631314	3632420	3631867	ID=PGSC0003DMG400042101	name=Cell wall galactomannoprotein Mp2/allergen F17	856553
ch05	3628077	3628403	3628240	ID=PGSC0003DMG400030523	name=EIN3-binding F-box protein 1	860180
ch05	5348227	5352952	5.35059e+06	ID=PGSC0003DMG400003380	name=Late blight resistance protein homolog R1A-4	862170
ch05	3623957	3625289	3624623	ID=PGSC0003DMG400045717	name=Glycine-rich protein 2	863797
ch05	3622692	3623363	3.62303e+06	ID=PGSC0003DMG400030524	name=EIN3-binding F-box protein 1	865392
ch05	3616045	3616519	3616282	ID=PGSC0003DMG400030525	name=EIN3-binding F-box protein 1	872138
ch05	5359366	5362349	5.36086e+06	ID=PGSC0003DMG400003384	name=Origin-recognition complex subunit 6	872438
ch05	5363053	5370526	5.36679e+06	ID=PGSC0003DMG400003385	name=Binding protein	878370
ch05	5380873	5385797	5383335	ID=PGSC0003DMG400003381	name=Conserved gene of unknown function	894915
ch05	3590597	3594679	3592638	ID=PGSC0003DMG400030526	name=Pentatricopeptide repeat-containing protein	895782
ch05	3582668	3587942	3585305	ID=PGSC0003DMG400030568	name=GABA-specific permease	903115
ch05	5396420	5397782	5397101	ID=PGSC0003DMG400003382	name=TCP transcription factor	908681
ch05	5402006	5403160	5402583	ID=PGSC0003DMG400039953	name=F-box domain-containing protein	914163
ch05	5403492	5404610	5404051	ID=PGSC0003DMG400023055	name=F-Box protein	915631
ch05	5405642	5406574	5406108	ID=PGSC0003DMG400023063	name=Conserved gene of unknown function	917688
ch05	5412584	5416206	5414395	ID=PGSC0003DMG400023054	name=F-box domain-containing protein	925975
ch05	5422281	5423494	5.42289e+06	ID=PGSC0003DMG400046453	name=F-box protein	934468
ch05	3546251	3549026	3.54764e+06	ID=PGSC0003DMG400030527	name=Ceramide kinase	940782
ch05	3545065	3545508	3.54529e+06	ID=PGSC0003DMG400036326	name=Conserved gene of unknown function	943134
ch05	3542382	3542694	3542538	ID=PGSC0003DMG400030585	name=Gene of unknown function	945882
ch05	5433324	5436663	5.43499e+06	ID=PGSC0003DMG400023053	name=F-Box protein	946574
ch05	3540836	3541246	3541041	ID=PGSC0003DMG400030586	name=Gene of unknown function	947379
ch05	3536538	3543424	3539981	ID=PGSC0003DMG401030570	name=ER Phosphatidate Phosphatase	948439
ch05	5441884	5442726	5442305	ID=PGSC0003DMG400043381	name=F-box domain-containing protein	953885
ch05	3528458	3533541	3.531e+06	ID=PGSC0003DMG402030570	name=Phosphatidic acid phosphatase alpha	957420
ch05	3520239	3523652	3.52195e+06	ID=PGSC0003DMG400030528	name=Phosphatidic acid phosphatase alpha	966474
ch05	5458773	5461845	5460309	ID=PGSC0003DMG402023052	name=F-box domain-containing protein	971889
ch05	5462979	5464210	5.46359e+06	ID=PGSC0003DMG401023052	name=F-box domain-containing protein	975174
ch05	3505157	3508206	3.50668e+06	ID=PGSC0003DMG400030571	name=Ring finger containing protein	981738
ch05	5469503	5473373	5471438	ID=PGSC0003DMG400023062	name=Disease resistance protein	983018
ch05	5474956	5477116	5476036	ID=PGSC0003DMG402023061	name=HVA22 c	987616
ch05	5479001	5487596	5.4833e+06	ID=PGSC0003DMG401023061	name=Regulator of chromosome condensation RCC1	994878
ch05	3482473	3485301	3483887	ID=PGSC0003DMG400030572	name=ATP binding protein	1004533
ch05	5496806	5497515	5.49716e+06	ID=PGSC0003DMG400023060	name=Gene of unknown function	1.00874e+06
ch05	3469587	3474016	3.4718e+06	ID=PGSC0003DMG401030529	name=Nucleotidyltransferase	1.01662e+06
ch05	3465923	3468268	3.4671e+06	ID=PGSC0003DMG402030529	name=Conserved gene of unknown function	1.02132e+06
ch05	5512861	5516468	5.51466e+06	ID=PGSC0003DMG400023059	name=Ribulose-phosphate 3-epimerase, cytoplasmic isoform	1.02624e+06
ch05	3460047	3464281	3462164	ID=PGSC0003DMG400030573	name=Reticulon B14	1026256
ch05	5518054	5520670	5519362	ID=PGSC0003DMG400023058	name=40S ribosomal protein S9	1030942
ch05	3453699	3454490	3.45409e+06	ID=PGSC0003DMG400030587	name=Nonspecific lipid-transfer protein	1.03433e+06
ch05	3446147	3452767	3449457	ID=PGSC0003DMG400030574	name=Fiber protein Fb34	1038963
ch05	5533261	5534196	5.53373e+06	ID=PGSC0003DMG400023051	name=Conserved gene of unknown function	1.04531e+06
ch05	3438947	3442612	3.44078e+06	ID=PGSC0003DMG400030530	name=Gamma-glutamyl-gamma-aminobutyrate hydrolase	1.04764e+06
ch05	3430984	3438165	3.43457e+06	ID=PGSC0003DMG400030575	name=Conserved gene of unknown function	1.05385e+06
ch05	3413090	3418617	3.41585e+06	ID=PGSC0003DMG401030531	name=Wall-associated kinase	1.07257e+06
ch05	3412211	3412816	3.41251e+06	ID=PGSC0003DMG400030588	name=Gene of unknown function	1.07591e+06
ch05	5564035	5567888	5.56596e+06	ID=PGSC0003DMG400023057	name=Leucine Rich Repeat family protein	1.07754e+06
ch05	3408360	3411666	3410013	ID=PGSC0003DMG402030531	name=Wall-associated kinase	1078407
ch05	3402673	3405348	3.40401e+06	ID=PGSC0003DMG401030532	name=Wall-associated kinase	1.08441e+06
ch05	5573193	5576442	5.57482e+06	ID=PGSC0003DMG400023050	name=Kelch repeat-containing F-box family protein	1.0864e+06
ch05	3399406	3401749	3.40058e+06	ID=PGSC0003DMG403030532	name=Wall-associated kinase	1.08784e+06
ch05	3392764	3395330	3394047	ID=PGSC0003DMG400030533	name=Wall-associated kinase	1094373
ch05	3389295	3391956	3.39063e+06	ID=PGSC0003DMG400030534	name=Wall-associated kinase	1.09779e+06
ch05	3385781	3388467	3387124	ID=PGSC0003DMG402030532	name=Wall-associated kinase	1101296
ch05	3381432	3384003	3.38272e+06	ID=PGSC0003DMG400030535	name=Wall-associated kinase	1.1057e+06
ch05	3376179	3379279	3377729	ID=PGSC0003DMG400030536	name=Wall-associated kinase	1110691
ch05	3369053	3375639	3372346	ID=PGSC0003DMG400030576	name=Mitochondrial carrier protein	1116074
ch05	3358506	3366733	3.36262e+06	ID=PGSC0003DMG400030577	name=3-isopropylmalate dehydrogenase	1.1258e+06
ch05	3357219	3357723	3357471	ID=PGSC0003DMG400030589	name=Gene of unknown function	1130949
ch05	3354246	3356035	3.35514e+06	ID=PGSC0003DMG400030578	name=Receptor kinase	1.13328e+06
ch05	3350756	3352947	3.35185e+06	ID=PGSC0003DMG400030579	name=Receptor kinase	1.13657e+06
ch05	5635833	5637709	5636771	ID=PGSC0003DMG400023056	name=Transcription regulator	1148351
ch05	3329135	3330511	3329823	ID=PGSC0003DMG401030580	name=Receptor kinase	1158597
ch05	3317247	3319639	3318443	ID=PGSC0003DMG402030580	name=Receptor kinase	1169977
ch05	3303427	3307914	3.30567e+06	ID=PGSC0003DMG400030581	name=Receptor kinase	1.18275e+06
ch05	5679823	5684334	5.68208e+06	ID=PGSC0003DMG400025609	name=RNA recognition motif containing protein	1.19366e+06
ch05	5692338	5694725	5.69353e+06	ID=PGSC0003DMG400025610	name=Sucrose transporter	1.20511e+06
ch05	3278106	3279105	3.27861e+06	ID=PGSC0003DMG400014061	name=Receptor kinase	1.20981e+06
ch05	3274525	3275923	3275224	ID=PGSC0003DMG400014062	name=Acyltransferase	1213196
ch05	5700318	5704828	5702573	ID=PGSC0003DMG400025614	name=Homeobox-leucine zipper protein HAT7	1214153
ch05	5714878	5719113	5.717e+06	ID=PGSC0003DMG400025615	name=Disease resistance protein	1.22858e+06
ch05	3259144	3260199	3.25967e+06	ID=PGSC0003DMG400014063	name=Receptor kinase	1.22875e+06
ch05	3255056	3258439	3.25675e+06	ID=PGSC0003DMG400014064	name=Receptor kinase	1.23167e+06
ch05	3253061	3254580	3.25382e+06	ID=PGSC0003DMG400014066	name=Wall-associated kinase	1.2346e+06
ch05	5723483	5731577	5727530	ID=PGSC0003DMG400025611	name=Disease resistance protein	1239110
ch05	3244169	3248506	3.24634e+06	ID=PGSC0003DMG401014059	name=Protein phosphatase	1.24208e+06
ch05	3236446	3237586	3237016	ID=PGSC0003DMG402014059	name=Receptor kinase	1251404
ch05	3235115	3236373	3235744	ID=PGSC0003DMG403014059	name=Receptor kinase	1252676
ch05	3231542	3231926	3231734	ID=PGSC0003DMG404014059	name=Receptor kinase	1256686
ch05	3221902	3223419	3.22266e+06	ID=PGSC0003DMG400014060	name=Receptor kinase	1.26576e+06
ch05	3210403	3216479	3213441	ID=PGSC0003DMG400001269	name=Receptor kinase	1274979
ch05	5765092	5768126	5766609	ID=PGSC0003DMG400025612	name=Myb-like DNA-binding protein	1278189
ch05	3208991	3209392	3.20919e+06	ID=PGSC0003DMG400001270	name=Wall-associated kinase	1.27923e+06
ch05	5771484	5776828	5774156	ID=PGSC0003DMG400025616	name=UDP-galactose transporter	1285736
ch05	3197766	3200303	3.19903e+06	ID=PGSC0003DMG400001271	name=Receptor kinase	1.28939e+06
ch05	5788929	5792414	5.79067e+06	ID=PGSC0003DMG400025613	name=Protein kinase APK1B, chloroplast	1.30225e+06
ch05	5793062	5793430	5793246	ID=PGSC0003DMG400025618	name=Conserved gene of unknown function	1304826
ch05	3178069	3180475	3179272	ID=PGSC0003DMG400014579	name=Receptor kinase	1309148
ch05	3176344	3177026	3176685	ID=PGSC0003DMG402014557	name=Conserved gene of unknown function	1311735
ch05	3170118	3171087	3.1706e+06	ID=PGSC0003DMG400014578	name=Receptor kinase	1.31782e+06
ch05	3164372	3169502	3166937	ID=PGSC0003DMG401014557	name=Conserved gene of unknown function	1321483
ch05	3160383	3162429	3161406	ID=PGSC0003DMG400014577	name=Receptor kinase	1327014
ch05	3149722	3154050	3151886	ID=PGSC0003DMG400014576	name=Receptor kinase	1336534
ch05	3149039	3149659	3149349	ID=PGSC0003DMG400014556	name=Conserved gene of unknown function	1339071
ch05	3143409	3146825	3145117	ID=PGSC0003DMG400014555	name=Conserved gene of unknown function	1343303
ch05	3134676	3135307	3.13499e+06	ID=PGSC0003DMG402014554	name=Gene of unknown function	1.35343e+06
ch05	3125075	3134552	3.12981e+06	ID=PGSC0003DMG401014554	name=Conserved gene of unknown function	1.35861e+06
ch05	5870362	5877158	5873760	ID=PGSC0003DMG400017629	name=Calmodulin binding protein	1385340
ch05	3102021	3102905	3102463	ID=PGSC0003DMG402014575	name=TMV-associated RING finger protein	1385957
ch05	3093637	3100155	3096896	ID=PGSC0003DMG401014575	name=Chaperone protein dnaJ 15	1391524
ch05	5888874	5893778	5891326	ID=PGSC0003DMG400017645	name=Serine/threonine-protein kinase PBS1	1402906
ch05	5893911	5894694	5.8943e+06	ID=PGSC0003DMG400017628	name=WRKY transcription factor	1.40588e+06
ch05	3081069	3082137	3081603	ID=PGSC0003DMG400014574	name=Zinc finger protein	1406817
ch05	5903924	5907317	5.90562e+06	ID=PGSC0003DMG400017627	name=DNA-binding protein p24	1.4172e+06
ch05	3069072	3069916	3069494	ID=PGSC0003DMG400014553	name=Zinc finger protein	1418926
ch05	5910340	5914504	5912422	ID=PGSC0003DMG400017644	name=Zinc knuckle (CCHC-type) family protein	1424002
ch05	5914723	5917535	5916129	ID=PGSC0003DMG402017626	name=Pectate lyase	1427709
ch05	5918681	5923232	5.92096e+06	ID=PGSC0003DMG401017626	name=Alpha-amylase	1.43254e+06
ch05	3046556	3052706	3049631	ID=PGSC0003DMG400014552	name=Cysteinyl-tRNA synthetase	1438789
ch05	3041992	3043807	3.0429e+06	ID=PGSC0003DMG400014573	name=Conserved gene of unknown function	1.44552e+06
ch05	3037281	3038325	3037803	ID=PGSC0003DMG400014551	name=Conserved gene of unknown function	1450617
ch05	5940946	5945674	5943310	ID=PGSC0003DMG400017643	name=Conserved gene of unknown function	1454890
ch05	5946246	5952463	5.94935e+06	ID=PGSC0003DMG400017625	name=Serine/threonine protein kinase	1.46093e+06
ch05	3014370	3024120	3019245	ID=PGSC0003DMG400014572	name=Glutaminyl-tRNA synthetase	1469175
ch05	5961826	5962763	5.96229e+06	ID=PGSC0003DMG400017624	name=Serine/threonine protein kinase	1.47387e+06
ch05	3010226	3011701	3.01096e+06	ID=PGSC0003DMG400014550	name=MYB transcription factor MYB84	1.47746e+06
ch05	5967031	5967919	5967475	ID=PGSC0003DMG402017622	name=Conserved gene of unknown function	1479055
ch05	5967988	5968445	5.96822e+06	ID=PGSC0003DMG401017622	name=Gene of unknown function	1.4798e+06
ch05	2997356	3001120	2999238	ID=PGSC0003DMG400014571	name=Conserved gene of unknown function	1489182
ch05	2993494	2994953	2.99422e+06	ID=PGSC0003DMG400014570	name=AP2/ERF domain-containing transcription factor	1.4942e+06
ch05	5982304	5987996	5985150	ID=PGSC0003DMG400017642	name=PAS/LOV protein A	1496730
ch05	2989490	2989948	2989719	ID=PGSC0003DMG400014569	name=Gene of unknown function	1498701
ch05	5993323	5995563	5994443	ID=PGSC0003DMG400017641	name=Conserved gene of unknown function	1506023
ch05	2974083	2974595	2974339	ID=PGSC0003DMG400036385	name=AP2/ERF domain-containing transcription factor	1514081
ch05	6000174	6006202	6003188	ID=PGSC0003DMG400017621	name=Nitrate transporter	1514768
ch05	2963585	2969054	2.96632e+06	ID=PGSC0003DMG400014549	name=3-ketoacyl-CoA synthase	1.5221e+06
ch05	2957727	2959209	2958468	ID=PGSC0003DMG400014568	name=3-ketoacyl-CoA synthase	1529952
ch05	2953645	2957592	2.95562e+06	ID=PGSC0003DMG400014548	name=Protein kinase PKN/PRK1, effector	1.5328e+06
ch05	6018648	6027657	6.02315e+06	ID=PGSC0003DMG400017620	name=Nitrate transporter	1.53473e+06
ch05	2947216	2948013	2.94761e+06	ID=PGSC0003DMG400014567	name=Conserved gene of unknown function	1.54081e+06
ch05	2941260	2943570	2942415	ID=PGSC0003DMG400014566	name=Transcription factor	1546005
ch05	2923715	2925346	2.92453e+06	ID=PGSC0003DMG400014547	name=LOB domain-containing protein	1.56389e+06
ch05	6058127	6060925	6059526	ID=PGSC0003DMG400017640	name=Homeobox protein	1571106
ch05	6069151	6072261	6070706	ID=PGSC0003DMG400017619	name=Transport protein	1582286
ch05	6073431	6077368	6.0754e+06	ID=PGSC0003DMG400017639	name=Homeobox-leucine zipper protein ATHB-54	1.58698e+06
ch05	2899124	2899899	2.89951e+06	ID=PGSC0003DMG400014581	name=Gene of unknown function	1.58891e+06
ch05	6077929	6084820	6.08137e+06	ID=PGSC0003DMG400017618	name=Oligomeric golgi complex 7	1.59295e+06
ch05	2886031	2891012	2.88852e+06	ID=PGSC0003DMG400014546	name=Fiber protein Fb34	1.5999e+06
ch05	6085496	6091892	6088694	ID=PGSC0003DMG400017638	name=Regulator of chromosome condensation family protein	1600274
ch05	6089071	6096185	6092628	ID=PGSC0003DMG400017617	name=Isoamylase N-terminal domain containing protein	1604208
ch05	2883189	2884281	2883735	ID=PGSC0003DMG400014580	name=Conserved gene of unknown function	1604685
ch05	2873525	2880114	2.87682e+06	ID=PGSC0003DMG400014565	name=Zinc finger CCCH domain-containing protein 65	1.6116e+06
ch05	2864204	2867000	2865602	ID=PGSC0003DMG400014545	name=Conserved gene of unknown function	1622818
ch05	6118146	6121903	6.12002e+06	ID=PGSC0003DMG400017637	name=Nitrate transporter	1.6316e+06
ch05	2846037	2852520	2.84928e+06	ID=PGSC0003DMG400014544	name=50S ribosomal protein L15	1.63914e+06
ch05	6128127	6128519	6128323	ID=PGSC0003DMG400035139	name=Cyclin-like F-box	1639903
ch05	6144647	6148052	6.14635e+06	ID=PGSC0003DMG400017636	name=AMP deaminase	1.65793e+06
ch05	6150420	6156917	6.15367e+06	ID=PGSC0003DMG400017635	name=Conserved gene of unknown function	1.66525e+06
ch05	2820134	2824308	2822221	ID=PGSC0003DMG400014543	name=Monoglyceride lipase	1666199
ch05	2816681	2818995	2817838	ID=PGSC0003DMG400014564	name=Binding protein	1670582
ch05	6163764	6164223	6.16399e+06	ID=PGSC0003DMG400017634	name=Thioredoxin h6	1.67557e+06
ch05	2800989	2801840	2.80141e+06	ID=PGSC0003DMG400014563	name=Isopentenyltransferase	1.68701e+06
ch05	2792916	2793706	2793311	ID=PGSC0003DMG400014562	name=Gene of unknown function	1695109
ch05	2788385	2789123	2788754	ID=PGSC0003DMG400014561	name=Isopentenyltransferase	1699666
ch05	2781680	2782924	2782302	ID=PGSC0003DMG400014542	name=Conserved gene of unknown function	1706118
ch05	6196542	6197113	6.19683e+06	ID=PGSC0003DMG400017616	name=Gene of unknown function	1.70841e+06
ch05	6199577	6203453	6201515	ID=PGSC0003DMG400017632	name=Thioredoxin H	1713095
ch05	6199508	6204511	6.20201e+06	ID=PGSC0003DMG400017615	name=Potyviral capsid protein interacting protein 2a	1.71359e+06
ch05	2761526	2764714	2763120	ID=PGSC0003DMG400014560	name=Bifunctional nuclease	1725300
ch05	2748542	2750911	2.74973e+06	ID=PGSC0003DMG400014541	name=DNA binding protein	1.73869e+06
ch05	2724264	2731649	2.72796e+06	ID=PGSC0003DMG400014540	name=Alpha-glucosidase	1.76046e+06
ch05	6264670	6265344	6265007	ID=PGSC0003DMG400017631	name=Gene of unknown function	1776587
ch05	2710633	2711038	2.71084e+06	ID=PGSC0003DMG400014559	name=Conserved gene of unknown function	1.77758e+06
ch05	2697954	2698566	2698260	ID=PGSC0003DMG400014558	name=Conserved gene of unknown function	1790160
ch05	2690484	2695466	2692975	ID=PGSC0003DMG400014539	name=Nitrite transporter	1795445
ch05	6303894	6304493	6.30419e+06	ID=PGSC0003DMG400035975	name=Gene of unknown function	1.81577e+06
ch05	6306477	6312721	6309599	ID=PGSC0003DMG400022618	name=EMB2421	1821179
ch05	6340497	6342375	6341436	ID=PGSC0003DMG400022595	name=Pentatricopeptide repeat-containing protein, mitochondrial	1853016
ch05	6344307	6347345	6345826	ID=PGSC0003DMG400022619	name=Conserved gene of unknown function	1857406
ch05	6353137	6359817	6356477	ID=PGSC0003DMG400022620	name=Conserved gene of unknown function	1868057
ch05	2608825	2612970	2.6109e+06	ID=PGSC0003DMG400017391	name=GI10570	1.87752e+06
ch05	6369195	6372205	6370700	ID=PGSC0003DMG400022596	name=Kinase	1882280
ch05	6373112	6380338	6376725	ID=PGSC0003DMG400022621	name=Binding protein	1888305
ch05	2596168	2597196	2596682	ID=PGSC0003DMG400017392	name=S-locus F-box brothers	1891738
ch05	6385112	6386179	6.38565e+06	ID=PGSC0003DMG400045346	name=Glutathione S-transferase 1	1.89723e+06
ch05	6388309	6391972	6.39014e+06	ID=PGSC0003DMG400040636	name=Glutathione S-transferase 1	1.90172e+06
ch05	6393508	6393837	6.39367e+06	ID=PGSC0003DMG400022623	name=Glutathione S-transferase 1	1.90525e+06
ch05	6394671	6397197	6395934	ID=PGSC0003DMG400022624	name=Glutathione s-transferase	1907514
ch05	6399085	6402996	6.40104e+06	ID=PGSC0003DMG400022597	name=HIPL1 protein	1.91262e+06
ch05	2573742	2575142	2574442	ID=PGSC0003DMG400017422	name=Gene of unknown function	1913978
ch05	6402889	6403597	6403243	ID=PGSC0003DMG402022625	name=Gene of unknown function	1914823
ch05	6399850	6406751	6.4033e+06	ID=PGSC0003DMG401022625	name=Pentatricopeptide repeat-containing protein, mitochondrial	1.91488e+06
ch05	6410657	6411890	6.41127e+06	ID=PGSC0003DMG400022598	name=Conserved gene of unknown function	1.92285e+06
ch05	2561579	2565344	2.56346e+06	ID=PGSC0003DMG400017423	name=RNase Phy3	1.92496e+06
ch05	6414587	6417072	6.41583e+06	ID=PGSC0003DMG400022626	name=Conserved gene of unknown function	1.92741e+06
ch05	6417196	6421527	6.41936e+06	ID=PGSC0003DMG400022627	name=Galactosyltransferase	1.93094e+06
ch05	6428160	6430070	6429115	ID=PGSC0003DMG400022599	name=Serine-threonine protein kinase, plant-type	1940695
ch05	6430351	6438058	6.4342e+06	ID=PGSC0003DMG400022628	name=CW14 protein	1.94578e+06
ch05	6468536	6468985	6.46876e+06	ID=PGSC0003DMG400022644	name=Reverse transcriptase	1.98034e+06
ch05	6470409	6471266	6.47084e+06	ID=PGSC0003DMG400022645	name=Non-LTR retrolelement reverse transcriptase	1.98242e+06
ch05	2498172	2498510	2498341	ID=PGSC0003DMG400044653	name=Gene of unknown function	1990079
ch05	6478927	6484398	6.48166e+06	ID=PGSC0003DMG401022600	name=MYC1	1.99324e+06
ch05	6483560	6484398	6483979	ID=PGSC0003DMG402022600	name=DNA binding protein	1995559
ch05	2489884	2490417	2.49015e+06	ID=PGSC0003DMG400019998	name=SFBB16-alpha	1.99827e+06
ch05	2484873	2485866	2.48537e+06	ID=PGSC0003DMG400019997	name=RNase Phy3	2.00305e+06
ch05	6502663	6503756	6.50321e+06	ID=PGSC0003DMG400022601	name=Phospholipid-transporting ATPase	2.01479e+06
ch05	6503962	6505044	6504503	ID=PGSC0003DMG400043442	name=F-box protein	2016083
ch05	2457182	2458385	2.45778e+06	ID=PGSC0003DMG400019996	name=F-box family protein	2.03064e+06
ch05	6526381	6526863	6526622	ID=PGSC0003DMG400022602	name=Tir-nbs-lrr resistance protein	2038202
ch05	6528097	6537250	6.53267e+06	ID=PGSC0003DMG401022603	name=ATP binding / protein binding / transmembrane receptor	2.04425e+06
ch05	6537348	6538458	6537903	ID=PGSC0003DMG402022603	name=Tir-nbs-lrr resistance protein	2049483
ch05	6541383	6548391	6544887	ID=PGSC0003DMG400022630	name=Conserved gene of unknown function	2056467
ch05	6559460	6565011	6.56224e+06	ID=PGSC0003DMG400022604	name=Serine/threonine-protein phosphatase	2.07382e+06
ch05	6565931	6566665	6566298	ID=PGSC0003DMG402022631	name=Gene of unknown function	2077878
ch05	6565931	6568861	6567396	ID=PGSC0003DMG401022631	name=Conserved gene of unknown function	2078976
ch05	6570501	6572604	6.57155e+06	ID=PGSC0003DMG400022632	name=Inactive receptor kinase	2.08313e+06
ch05	6578441	6578989	6578715	ID=PGSC0003DMG400022605	name=Conserved gene of unknown function	2090295
ch05	2393286	2394401	2.39384e+06	ID=PGSC0003DMG400010976	name=F-box family protein	2.09458e+06
ch05	6582962	6585423	6.58419e+06	ID=PGSC0003DMG400022633	name=Ubiquitin-protein ligase	2.09577e+06
ch05	2390025	2390720	2.39037e+06	ID=PGSC0003DMG400010977	name=Gene of unknown function	2.09805e+06
ch05	6593035	6597489	6595262	ID=PGSC0003DMG400022634	name=Microtubule-associated protein TORTIFOLIA1	2106842
ch05	6620036	6628678	6624357	ID=PGSC0003DMG400022606	name=WRKY domain class transcription factor	2135937
ch05	6629865	6642473	6636169	ID=PGSC0003DMG400022635	name=Increased size exclusion limit 2	2147749
ch05	6647201	6654751	6650976	ID=PGSC0003DMG400022607	name=Pyruvate dehydrogenase E1 component subunit alpha, mitochondrial	2162556
ch05	2313801	2314901	2314351	ID=PGSC0003DMG400012976	name=F-box family protein	2174069
ch05	6664873	6666321	6665597	ID=PGSC0003DMG400022608	name=Transferase, transferring glycosyl groups	2177177
ch05	2310493	2311248	2.31087e+06	ID=PGSC0003DMG400012967	name=Conserved gene of unknown function	2.17755e+06
ch05	6670576	6672136	6671356	ID=PGSC0003DMG400022636	name=Germin 5	2182936
ch05	6681418	6687658	6684538	ID=PGSC0003DMG400022609	name=Conserved gene of unknown function	2196118
ch05	2287629	2293817	2290723	ID=PGSC0003DMG400012966	name=Dihydrolipoyllysine-residue acetyltransferase component of pyruvate dehydrogenase	2197697
ch05	2270079	2276799	2273439	ID=PGSC0003DMG400012975	name=Prp4	2214981
ch05	2260599	2262820	2.26171e+06	ID=PGSC0003DMG400012974	name=Conserved gene of unknown function	2.22671e+06
ch05	2258949	2260012	2.25948e+06	ID=PGSC0003DMG402012965	name=Homologous-pairing protein 2 homolog	2.22894e+06
ch05	2255814	2257171	2.25649e+06	ID=PGSC0003DMG401012965	name=Plastid-specific 30S ribosomal protein 3, chloroplast	2.23193e+06
ch05	6724079	6724660	6.72437e+06	ID=PGSC0003DMG400036916	name=Gene of unknown function	2.23595e+06
ch05	2247566	2252022	2249794	ID=PGSC0003DMG400012973	name=Conserved gene of unknown function	2238626
ch05	6729414	6734055	6.73173e+06	ID=PGSC0003DMG400022610	name=Pentatricopeptide repeat-containing protein	2.24331e+06
ch05	6734325	6736198	6.73526e+06	ID=PGSC0003DMG400022611	name=Vitellogenic carboxypeptidase	2.24684e+06
ch05	6737151	6740145	6738648	ID=PGSC0003DMG400022612	name=Conserved gene of unknown function	2250228
ch05	6740622	6743451	6.74204e+06	ID=PGSC0003DMG400022639	name=Actin binding protein	2.25362e+06
ch05	2232558	2233472	2233015	ID=PGSC0003DMG400012972	name=Conserved gene of unknown function	2255405
ch05	2223501	2230860	2.22718e+06	ID=PGSC0003DMG400012971	name=Protein phosphatase 2A	2.26124e+06
ch05	6751583	6752619	6752101	ID=PGSC0003DMG401022640	name=Conserved gene of unknown function	2263681
ch05	6751583	6754973	6753278	ID=PGSC0003DMG402022640	name=Two-component sensor protein histidine protein kinase	2264858
ch05	2213939	2215279	2214609	ID=PGSC0003DMG400012964	name=Lipase	2273811
ch05	6764539	6768528	6.76653e+06	ID=PGSC0003DMG401022613	name=Zinc ion binding	2.27811e+06
ch05	6767838	6768498	6768168	ID=PGSC0003DMG402022613	name=Gene of unknown function	2279748
ch05	2205646	2207232	2206439	ID=PGSC0003DMG400012970	name=PGPS/D12	2281981
ch05	6769503	6774474	6.77199e+06	ID=PGSC0003DMG400022615	name=Conserved gene of unknown function	2.28357e+06
ch05	6774621	6777054	6.77584e+06	ID=PGSC0003DMG400022641	name=Reductase 2	2.28742e+06
ch05	6784548	6784959	6.78475e+06	ID=PGSC0003DMG400022646	name=Conserved gene of unknown function	2.29633e+06
ch05	6788541	6789127	6788834	ID=PGSC0003DMG400022647	name=Conserved gene of unknown function	2300414
ch05	6792359	6793093	6792726	ID=PGSC0003DMG400022616	name=Conserved gene of unknown function	2304306
ch05	2180034	2181147	2.18059e+06	ID=PGSC0003DMG400012969	name=Isoform 2 of Transcription factor bHLH18	2.30783e+06
ch05	6796192	6797364	6796778	ID=PGSC0003DMG400044936	name=Conserved gene of unknown function	2308358
ch05	2168066	2173732	2170899	ID=PGSC0003DMG400012962	name=Transcription factor HBP-1b(C1)	2317521
ch05	6809155	6810158	6.80966e+06	ID=PGSC0003DMG400043542	name=Gene of unknown function	2.32124e+06
ch05	6817449	6817754	6.8176e+06	ID=PGSC0003DMG401022617	name=30S ribosomal protein S18, chloroplastic	2.32918e+06
ch05	6815513	6819972	6.81774e+06	ID=PGSC0003DMG402022617	name=ATP-dependent Clp protease proteolytic subunit	2.32932e+06
ch05	2154052	2162364	2158208	ID=PGSC0003DMG402012961	name=Protein PNS1	2330212
ch05	6822892	6823908	6823400	ID=PGSC0003DMG400046081	name=Matrix metalloprotease 1	2334980
ch05	6825028	6825390	6825209	ID=PGSC0003DMG400039371	name=Gene of unknown function	2336789
ch05	2149023	2151041	2150032	ID=PGSC0003DMG401012961	name=Aspartic proteinase nepenthesin-1	2338388
ch05	2134566	2140290	2137428	ID=PGSC0003DMG400000829	name=Transmembrane protein TPARL	2350992
ch05	6844795	6845100	6.84495e+06	ID=PGSC0003DMG400037202	name=Matrix metalloprotease 1	2.35653e+06
ch05	2125547	2129338	2.12744e+06	ID=PGSC0003DMG400000818	name=Lysine/histidine transporter	2.36098e+06
ch05	6850558	6851653	6.85111e+06	ID=PGSC0003DMG400036118	name=Conserved gene of unknown function	2.36269e+06
ch05	2119197	2120273	2119735	ID=PGSC0003DMG402000817	name=Gene of unknown function	2368685
ch05	6859145	6862638	6.86089e+06	ID=PGSC0003DMG400026865	name=Gene of unknown function	2.37247e+06
ch05	2109568	2116353	2.11296e+06	ID=PGSC0003DMG401000817	name=Phytochrome and flowering time 1 protein	2.37546e+06
ch05	2094104	2097092	2095598	ID=PGSC0003DMG400000828	name=DNA binding protein	2392822
ch05	2069034	2074818	2071926	ID=PGSC0003DMG400000816	name=Tospovirus resistance protein A	2416494
ch05	2068116	2068967	2.06854e+06	ID=PGSC0003DMG400000815	name=NBS-coding resistance gene analog	2.41988e+06
ch05	2063328	2066456	2064892	ID=PGSC0003DMG400000813	name=NBS-LRR resistance protein	2423528
ch05	2055919	2056953	2056436	ID=PGSC0003DMG400046144	name=Zinc finger family protein	2431984
ch05	2044222	2052212	2048217	ID=PGSC0003DMG400000812	name=Methionine aminopeptidase	2440203
ch05	6929662	6930771	6.93022e+06	ID=PGSC0003DMG400041867	name=Metalloendoproteinase 1	2.4418e+06
ch05	2036553	2038068	2.03731e+06	ID=PGSC0003DMG400000811	name=RAV transcription factor	2.45111e+06
ch05	6939413	6940059	6939736	ID=PGSC0003DMG400015589	name=Gene of unknown function	2451316
ch05	6943521	6944441	6943981	ID=PGSC0003DMG400015588	name=Tospovirus resistance protein A	2455561
ch05	6964731	6966929	6965830	ID=PGSC0003DMG400015613	name=F-box and wd40 domain protein	2477410
ch05	1995746	2004151	1.99995e+06	ID=PGSC0003DMG400000810	name=Serine-threonine protein kinase, plant-type	2.48847e+06
ch05	6977434	6978218	6977826	ID=PGSC0003DMG400015617	name=Gene of unknown function	2489406
ch05	6983533	6989192	6.98636e+06	ID=PGSC0003DMG400015612	name=Conserved gene of unknown function	2.49794e+06
ch05	1981074	1983124	1982099	ID=PGSC0003DMG400000827	name=Glycosyltransferase, CAZy family GT8	2506321
ch05	6995422	6996475	6.99595e+06	ID=PGSC0003DMG400015611	name=C2H2L domain class transcription factor	2.50753e+06
ch05	7002101	7003069	7002585	ID=PGSC0003DMG400015610	name=F-box family protein	2514165
ch05	7007232	7008219	7.00773e+06	ID=PGSC0003DMG400015586	name=Gene of unknown function	2.51931e+06
ch05	1952257	1958504	1.95538e+06	ID=PGSC0003DMG400000809	name=NAC domain protein	2.53304e+06
ch05	1944065	1951399	1947732	ID=PGSC0003DMG400000826	name=Gc-rich sequence DNA-binding factor	2540688
ch05	1940371	1943386	1.94188e+06	ID=PGSC0003DMG400000825	name=Leucoanthocyanidin reductase 1	2.54654e+06
ch05	1931092	1938852	1934972	ID=PGSC0003DMG400000808	name=Zinc finger family protein	2553448
ch05	7047237	7053233	7050235	ID=PGSC0003DMG400015608	name=Altered response to gravity (Arg1), plant	2561815
ch05	7054220	7055338	7054779	ID=PGSC0003DMG400015584	name=Peroxidase 65	2566359
ch05	1912078	1916897	1.91449e+06	ID=PGSC0003DMG400000824	name=DNA binding protein	2.57393e+06
ch05	1901842	1903487	1.90266e+06	ID=PGSC0003DMG400000807	name=Basic 7S globulin 2 small subunit	2.58576e+06
ch05	1889590	1891173	1.89038e+06	ID=PGSC0003DMG400000823	name=TCP transcription factor	2.59804e+06
ch05	1880448	1884340	1882394	ID=PGSC0003DMG400000806	name=Coiled-coil domain-containing protein	2606026
ch05	7093667	7098815	7096241	ID=PGSC0003DMG400015607	name=Iaa-amino acid hydrolase 10	2607821
ch05	1875585	1876098	1.87584e+06	ID=PGSC0003DMG400000830	name=CLE12	2.61258e+06
ch05	7110383	7110939	7110661	ID=PGSC0003DMG400039487	name=Gene of unknown function	2622241
ch05	1861355	1865477	1863416	ID=PGSC0003DMG400000822	name=ATP binding protein	2625004
ch05	7114019	7117749	7115884	ID=PGSC0003DMG400015606	name=Conserved gene of unknown function	2627464
ch05	1857415	1863020	1.86022e+06	ID=PGSC0003DMG400000805	name=CHUP1 (CHLOROPLAST UNUSUAL POSITIONING 1)	2.6282e+06
ch05	7120247	7121397	7120822	ID=PGSC0003DMG400015582	name=Conserved gene of unknown function	2632402
ch05	7123336	7125788	7124562	ID=PGSC0003DMG400015581	name=Gene of unknown function	2636142
ch05	1848726	1854983	1.85185e+06	ID=PGSC0003DMG400000804	name=Conserved gene of unknown function	2.63657e+06
ch05	7128021	7131447	7129734	ID=PGSC0003DMG402015580	name=Conserved gene of unknown function	2641314
ch05	1844193	1848079	1846136	ID=PGSC0003DMG400000803	name=Cytochrome B561 family protein	2642284
ch05	7132671	7133079	7132875	ID=PGSC0003DMG400015616	name=Gene of unknown function	2644455
ch05	7133837	7137926	7.13588e+06	ID=PGSC0003DMG401015580	name=Conserved gene of unknown function	2.64746e+06
ch05	1838574	1840577	1.83958e+06	ID=PGSC0003DMG400000821	name=Signal peptidase I	2.64884e+06
ch05	1836050	1837663	1.83686e+06	ID=PGSC0003DMG400000820	name=Conserved gene of unknown function	2.65156e+06
ch05	7139948	7140381	7.14016e+06	ID=PGSC0003DMG400015615	name=Conserved gene of unknown function	2.65174e+06
ch05	1829233	1835886	1.83256e+06	ID=PGSC0003DMG400000802	name=Conserved gene of unknown function	2.65586e+06
ch05	7150718	7153118	7151918	ID=PGSC0003DMG400015605	name=Cytochrome P450	2663498
ch05	1821096	1823938	1822517	ID=PGSC0003DMG400000819	name=Serine-threonine protein kinase, plant-type	2665903
ch05	7155706	7158069	7.15689e+06	ID=PGSC0003DMG400015604	name=Transcription cofactor	2.66847e+06
ch05	7164479	7174355	7169417	ID=PGSC0003DMG400015603	name=Chloroplast envelope protein 1	2680997
ch05	7176793	7178616	7.1777e+06	ID=PGSC0003DMG400015602	name=Gibberellin-regulated protein 3	2.68928e+06
ch05	7179764	7182103	7.18093e+06	ID=PGSC0003DMG400015579	name=UDP-glucose:glucosyltransferase	2.69251e+06
ch05	7189488	7192188	7190838	ID=PGSC0003DMG400015601	name=UDP-glucose:glucosyltransferase	2702418
ch05	7211099	7216817	7213958	ID=PGSC0003DMG400015600	name=DNA pol lambda	2725538
ch05	7217099	7219214	7.21816e+06	ID=PGSC0003DMG400015599	name=Conserved gene of unknown function	2.72974e+06
ch05	7219550	7222918	7221234	ID=PGSC0003DMG400015577	name=RNase H domain-containing protein	2732814
ch05	7223805	7232374	7.22809e+06	ID=PGSC0003DMG400015576	name=Nuclease	2.73967e+06
ch05	7235949	7237005	7236477	ID=PGSC0003DMG400015598	name=Conserved gene of unknown function	2748057
ch05	1737542	1738700	1738121	ID=PGSC0003DMG400025112	name=Conserved gene of unknown function	2750299
ch05	7239163	7242611	7240887	ID=PGSC0003DMG400015575	name=RNA recognition motif (RRM)-containing protein	2752467
ch05	1689811	1690959	1690385	ID=PGSC0003DMG400025109	name=Gene of unknown function	2798035
ch05	7285840	7289350	7287595	ID=PGSC0003DMG400015597	name=D1-type cyclin	2799175
ch05	1687653	1689130	1.68839e+06	ID=PGSC0003DMG400025108	name=Gene of unknown function	2.80003e+06
ch05	1677861	1678597	1678229	ID=PGSC0003DMG402025107	name=Gene of unknown function	2810191
ch05	1670362	1672809	1.67159e+06	ID=PGSC0003DMG401025107	name=Gene of unknown function	2.81683e+06
ch05	7302362	7308240	7305301	ID=PGSC0003DMG400015596	name=Conserved gene of unknown function	2816881
ch05	7306514	7308265	7.30739e+06	ID=PGSC0003DMG400015574	name=Conserved gene of unknown function	2.81897e+06
ch05	1659655	1660475	1660065	ID=PGSC0003DMG400025106	name=ATP synthase epsilon chain, chloroplastic	2828355
ch05	1647754	1656085	1.65192e+06	ID=PGSC0003DMG400025105	name=Carboxylesterase	2.8365e+06
ch05	7331949	7337703	7334826	ID=PGSC0003DMG400015573	name=Purine permease	2846406
ch05	7342929	7344566	7.34375e+06	ID=PGSC0003DMG400043677	name=Gene of unknown function	2.85533e+06
ch05	1623135	1632749	1627942	ID=PGSC0003DMG400025127	name=Pho1	2860478
ch05	1621844	1623273	1.62256e+06	ID=PGSC0003DMG400025104	name=AGP19 (ARABINOGALACTAN-PROTEIN 19)	2.86586e+06
ch05	1613912	1620647	1.61728e+06	ID=PGSC0003DMG400025103	name=Cytidine/deoxycytidylate deaminase family protein	2.87114e+06
ch05	7359482	7362610	7361046	ID=PGSC0003DMG400015595	name=LATD/NIP	2872626
ch05	7368720	7371036	7369878	ID=PGSC0003DMG400015572	name=LATD/NIP	2881458
ch05	1592770	1599847	1.59631e+06	ID=PGSC0003DMG400025126	name=Phospholipid-transporting ATPase 9	2.89211e+06
ch05	7382390	7382887	7.38264e+06	ID=PGSC0003DMG400045927	name=Gene of unknown function	2.89422e+06
ch05	7383634	7384728	7384181	ID=PGSC0003DMG400042281	name=Conserved gene of unknown function	2895761
ch05	1583153	1591150	1.58715e+06	ID=PGSC0003DMG400025102	name=ATP binding protein	2.90127e+06
ch05	7392962	7395545	7.39425e+06	ID=PGSC0003DMG400015594	name=LATD/NIP	2.90583e+06
ch05	1572075	1578772	1.57542e+06	ID=PGSC0003DMG400025101	name=HD domain containing protein	2.913e+06
ch05	7410649	7413350	7.412e+06	ID=PGSC0003DMG400015593	name=LATD/NIP	2.92358e+06
ch05	1559374	1560180	1559777	ID=PGSC0003DMG400025100	name=F-box family protein	2928643
ch05	7415726	7420927	7.41833e+06	ID=PGSC0003DMG400015592	name=Nitrate transporter	2.92991e+06
ch05	7418096	7418714	7418405	ID=PGSC0003DMG400015614	name=LATD/NIP	2929985
ch05	1555076	1558373	1.55672e+06	ID=PGSC0003DMG400025125	name=Gene of unknown function	2.9317e+06
ch05	7423691	7424127	7423909	ID=PGSC0003DMG400034373	name=Gene of unknown function	2935489
ch05	7434787	7437034	7.43591e+06	ID=PGSC0003DMG400015591	name=Nitrate transporter	2.94749e+06
ch05	7442430	7442974	7442702	ID=PGSC0003DMG402015590	name=Nitrate transporter	2954282
ch05	7443316	7444178	7443747	ID=PGSC0003DMG401015590	name=Nitrate transporter	2955327
ch05	1530526	1531396	1530961	ID=PGSC0003DMG400025128	name=Conserved gene of unknown function	2957459
ch05	7460313	7460780	7.46055e+06	ID=PGSC0003DMG400034536	name=Gene of unknown function	2.97213e+06
ch05	1500545	1506500	1.50352e+06	ID=PGSC0003DMG400025099	name=PRF	2.9849e+06
ch05	1494012	1498760	1496386	ID=PGSC0003DMG400025098	name=All-trans-retinol 13,14-reductase	2992034
ch05	1488254	1489234	1488744	ID=PGSC0003DMG400046639	name=F-box family protein	2999676
ch05	1485991	1486716	1.48635e+06	ID=PGSC0003DMG400045529	name=F-box family protein	3.00207e+06
ch05	1481126	1482112	1481619	ID=PGSC0003DMG400036030	name=F-box family protein	3006801
ch05	1475651	1476829	1476240	ID=PGSC0003DMG400044791	name=F-box family protein	3012180
ch05	1473568	1474524	1474046	ID=PGSC0003DMG400025124	name=Ubiquitin-protein ligase	3014374
ch05	1464931	1469384	1.46716e+06	ID=PGSC0003DMG400025123	name=Class S F-box protein	3.02126e+06
ch05	7516187	7523861	7520024	ID=PGSC0003DMG400038206	name=Nitrate transporter	3031604
ch05	7524932	7526789	7.52586e+06	ID=PGSC0003DMG400004134	name=Nitrate transporter	3.03744e+06
ch05	1443538	1454045	1.44879e+06	ID=PGSC0003DMG400025122	name=Rubisco subunit binding-protein beta subunit, rubb	3.03963e+06
ch05	7528121	7529797	7528959	ID=PGSC0003DMG400004133	name=LATD/NIP	3040539
ch05	1442539	1443410	1.44297e+06	ID=PGSC0003DMG400025097	name=Gene of unknown function	3.04545e+06
ch05	7530524	7537250	7533887	ID=PGSC0003DMG400004132	name=N-acetyltransferase	3045467
ch05	7531834	7537250	7534542	ID=PGSC0003DMG400004123	name=Serine/threonine-protein kinase PBS1	3046122
ch05	1437168	1441274	1439221	ID=PGSC0003DMG400025121	name=6-phosphogluconate dehydrogenase, decarboxylating	3049199
ch05	7538829	7541985	7540407	ID=PGSC0003DMG400004122	name=30S ribosomal protein S13, chloroplastic	3051987
ch05	1434477	1435363	1434920	ID=PGSC0003DMG400025096	name=Conserved gene of unknown function	3053500
ch05	7546929	7548191	7547560	ID=PGSC0003DMG400004131	name=Major latex	3059140
ch05	1420615	1428454	1.42453e+06	ID=PGSC0003DMG400025120	name=ASC1	3.06389e+06
ch05	1415273	1419957	1417615	ID=PGSC0003DMG400025119	name=Conserved gene of unknown function	3070805
ch05	7558009	7567322	7.56267e+06	ID=PGSC0003DMG402004120	name=Auxin-induced protein 5NG4	3.07425e+06
ch05	7568028	7571415	7.56972e+06	ID=PGSC0003DMG401004120	name=Auxin-induced protein 5NG4	3.0813e+06
ch05	7572151	7576843	7574497	ID=PGSC0003DMG400004119	name=Auxin-induced protein 5NG4	3086077
ch05	7577951	7581368	7.57966e+06	ID=PGSC0003DMG400004118	name=Auxin-induced protein 5NG4	3.09124e+06
ch05	7584954	7588163	7.58656e+06	ID=PGSC0003DMG400004130	name=Glyceraldehyde-3-phosphate dehydrogenase C subunit	3.09814e+06
ch05	1378274	1385096	1381685	ID=PGSC0003DMG400025117	name=Uridine cytidine kinase I	3106735
ch05	1375494	1377987	1.37674e+06	ID=PGSC0003DMG400025095	name=Ubiquitin-protein ligase	3.11168e+06
ch05	1365859	1366208	1.36603e+06	ID=PGSC0003DMG400025116	name=Gene of unknown function	3.12239e+06
ch05	1362800	1363132	1362966	ID=PGSC0003DMG400046785	name=Ubiquitin-protein ligase	3125454
ch05	1353573	1357955	1355764	ID=PGSC0003DMG400025115	name=Conserved gene of unknown function	3132656
ch05	7620910	7623275	7.62209e+06	ID=PGSC0003DMG400004129	name=Conserved gene of unknown function	3.13367e+06
ch05	1348446	1349956	1349201	ID=PGSC0003DMG400025114	name=Ubiquitin-protein ligase	3139219
ch05	1342794	1346975	1.34488e+06	ID=PGSC0003DMG400025093	name=Ubiquitin-protein ligase	3.14354e+06
ch05	1335800	1337254	1336527	ID=PGSC0003DMG400045388	name=F-box/FBD/LRR-repeat protein	3151893
ch05	7640385	7641906	7.64115e+06	ID=PGSC0003DMG400004128	name=Ring finger protein	3.15273e+06
ch05	1328323	1329136	1.32873e+06	ID=PGSC0003DMG400025113	name=Conserved gene of unknown function	3.15969e+06
ch05	7645185	7664375	7654780	ID=PGSC0003DMG400004116	name=AP-1 complex subunit gamma-2	3166360
ch05	1313980	1318881	1.31643e+06	ID=PGSC0003DMG400007517	name=Leucine-rich repeat receptor-like kinase	3.17199e+06
ch05	7667645	7671571	7669608	ID=PGSC0003DMG400004127	name=NHL repeat-containing protein	3181188
ch05	7673124	7676670	7674897	ID=PGSC0003DMG400004115	name=NHL repeat-containing protein	3186477
ch05	1292833	1296323	1294578	ID=PGSC0003DMG400007518	name=S-adenosylmethionine decarboxylase beta chain	3193842
ch05	7684187	7691671	7687929	ID=PGSC0003DMG400004114	name=Trehalose 6-phosphate synthase	3199509
ch05	1268547	1278244	1.2734e+06	ID=PGSC0003DMG400007515	name=Aminoalcoholphosphotransferase	3.21502e+06
ch05	1264027	1267462	1.26574e+06	ID=PGSC0003DMG400007519	name=Conserved gene of unknown function	3.22268e+06
ch05	7712490	7715076	7713783	ID=PGSC0003DMG400004126	name=F-box	3225363
ch05	7716491	7722639	7719565	ID=PGSC0003DMG400004113	name=Potassium transporter	3231145
ch05	1255765	1256888	1.25633e+06	ID=PGSC0003DMG400007516	name=Conserved gene of unknown function	3.23209e+06
ch05	1251036	1252687	1.25186e+06	ID=PGSC0003DMG400007520	name=Conserved gene of unknown function	3.23656e+06
ch05	1247925	1250012	1.24897e+06	ID=PGSC0003DMG400007521	name=Conserved gene of unknown function	3.23945e+06
ch05	1244512	1246113	1.24531e+06	ID=PGSC0003DMG400043560	name=U3 small nucleolar RNA-associated protein	3.24311e+06
ch05	1242274	1243248	1242761	ID=PGSC0003DMG400044925	name=Ubiquitin-protein ligase	3245659
ch05	1240269	1241057	1240663	ID=PGSC0003DMG400042211	name=F-box family protein	3247757
ch05	1237004	1237700	1237352	ID=PGSC0003DMG400007522	name=F-box family protein	3251068
ch05	7738324	7742347	7.74034e+06	ID=PGSC0003DMG400004112	name=Conserved gene of unknown function	3.25192e+06
ch05	1234814	1235968	1235391	ID=PGSC0003DMG400045879	name=Ubiquitin-protein ligase	3253029
ch05	1229605	1230149	1229877	ID=PGSC0003DMG400045711	name=Gene of unknown function	3258543
ch05	1228842	1229498	1229170	ID=PGSC0003DMG400040165	name=Conserved gene of unknown function	3259250
ch05	1226267	1227037	1226652	ID=PGSC0003DMG400007523	name=Ocs element-binding factor	3261768
ch05	7752878	7756398	7754638	ID=PGSC0003DMG400004111	name=Spermidine synthase	3266218
ch05	7764039	7764488	7.76426e+06	ID=PGSC0003DMG400004110	name=Plant disease resistant protein	3.27584e+06
ch05	1206451	1207110	1.20678e+06	ID=PGSC0003DMG400007526	name=Conserved gene of unknown function	3.28164e+06
ch05	7767911	7772402	7.77016e+06	ID=PGSC0003DMG401004125	name=Aldehyde dehydrogenase (NAD+)	3.28174e+06
ch05	1205196	1206015	1.20561e+06	ID=PGSC0003DMG400007524	name=Gene of unknown function	3.28281e+06
ch05	1203623	1204194	1.20391e+06	ID=PGSC0003DMG400007527	name=Conserved gene of unknown function	3.28451e+06
ch05	1201198	1201958	1201578	ID=PGSC0003DMG400007525	name=Gene of unknown function	3286842
ch05	1200301	1200797	1200549	ID=PGSC0003DMG400007528	name=Conserved gene of unknown function	3287871
ch05	7774270	7779490	7776880	ID=PGSC0003DMG402004125	name=Mitochondrial benzaldehyde dehydrogenase	3288460
ch05	1177299	1184781	1181040	ID=PGSC0003DMG400019653	name=TATA binding protein associated factor 24kDa subunit	3307380
ch05	1161861	1162920	1.16239e+06	ID=PGSC0003DMG400019652	name=Pepper esterase	3.32603e+06
ch05	1145277	1150734	1.14801e+06	ID=PGSC0003DMG400019651	name=WPP domain-interacting tail-anchored protein 2	3.34041e+06
ch05	7831932	7832724	7832328	ID=PGSC0003DMG400004124	name=Ribosomal protein S9	3343908
ch05	7834994	7836879	7.83594e+06	ID=PGSC0003DMG400004109	name=Xyloglucan endotransglycosylase hydrolase	3.34752e+06
ch05	7838200	7838648	7838424	ID=PGSC0003DMG400004136	name=Gene of unknown function	3350004
ch05	1128801	1132733	1130767	ID=PGSC0003DMG400019659	name=Transcription factor bHLH49	3357653
ch05	7845565	7847247	7846406	ID=PGSC0003DMG400045432	name=Spotted leaf protein	3357986
ch05	7847740	7849784	7848762	ID=PGSC0003DMG400004108	name=Serine-threonine protein kinase, plant-type	3360342
ch05	1120928	1127971	1.12445e+06	ID=PGSC0003DMG400019658	name=Pentatricopeptide repeat-containing protein	3.36397e+06
ch05	1120928	1123831	1.12238e+06	ID=PGSC0003DMG400019650	name=Conserved gene of unknown function	3.36604e+06
ch05	1115476	1119495	1.11749e+06	ID=PGSC0003DMG400019649	name=U-box domain-containing protein 42	3.37093e+06
ch05	7875947	7876372	7.87616e+06	ID=PGSC0003DMG400017003	name=Gene of unknown function	3.38774e+06
ch05	1091623	1099314	1.09547e+06	ID=PGSC0003DMG400019647	name=Heat shock protein 90	3.39295e+06
ch05	1085106	1087833	1.08647e+06	ID=PGSC0003DMG400019646	name=Protein bem46	3.40195e+06
ch05	7891437	7891850	7.89164e+06	ID=PGSC0003DMG400044011	name=Conserved gene of unknown function	3.40322e+06
ch05	1080758	1082370	1081564	ID=PGSC0003DMG400019645	name=UDPG glucosyltransferase	3406856
ch05	7896659	7897072	7.89687e+06	ID=PGSC0003DMG400041832	name=Conserved gene of unknown function	3.40845e+06
ch05	1078228	1079896	1079062	ID=PGSC0003DMG400019644	name=Glycosyltransferase	3409358
ch05	7899168	7899928	7899548	ID=PGSC0003DMG400034371	name=Gene of unknown function	3411128
ch05	1074029	1075417	1074723	ID=PGSC0003DMG400019657	name=Glycosyltransferase	3413697
ch05	1070502	1071839	1.07117e+06	ID=PGSC0003DMG400019643	name=Enoyl-CoA hydratase/isomerase family protein	3.41725e+06
ch05	1067941	1069041	1068491	ID=PGSC0003DMG400046279	name=F-box protein	3419929
ch05	1049644	1052834	1051239	ID=PGSC0003DMG400019642	name=Pentatricopeptide repeat-containing protein	3437181
ch05	1045271	1047664	1.04647e+06	ID=PGSC0003DMG400019656	name=GMP synthase	3.44195e+06
ch05	7936418	7936860	7936639	ID=PGSC0003DMG400047305	name=Gene of unknown function	3448219
ch05	1038330	1041720	1040025	ID=PGSC0003DMG400019641	name=Inositol or phosphatidylinositol kinase	3448395
ch05	1026031	1026498	1.02626e+06	ID=PGSC0003DMG400038216	name=Gene of unknown function	3.46216e+06
ch05	1017890	1021585	1.01974e+06	ID=PGSC0003DMG400040177	name=Gene of unknown function	3.46868e+06
ch05	1013343	1014855	1014099	ID=PGSC0003DMG400019655	name=Ubiquitin-protein ligase	3474321
ch05	1008250	1012670	1010460	ID=PGSC0003DMG400019654	name=BHLH domain class transcription factor	3477960
ch05	1003752	1008068	1005910	ID=PGSC0003DMG402019640	name=Prolyl oligopeptidase family protein	3482510
ch05	1001148	1003694	1002421	ID=PGSC0003DMG401019640	name=Oligopeptidase B	3485999
ch05	999086	999391	999238	ID=PGSC0003DMG400019660	name=Conserved gene of unknown function	3.48918e+06
ch05	993340	994332	993836	ID=PGSC0003DMG400005584	name=Flavonol 4'-sulfotransferase	3494584
ch05	988083	989287	988685	ID=PGSC0003DMG400005585	name=Gene of unknown function	3499735
ch05	985497	986041	985769	ID=PGSC0003DMG400005586	name=Gene of unknown function	3502651
ch05	7996696	7997046	7996871	ID=PGSC0003DMG400017004	name=Conserved gene of unknown function	3508451
ch05	963585	968196	965890	ID=PGSC0003DMG400025716	name=Conserved gene of unknown function	3.52253e+06
ch05	8017518	8018279	8.0179e+06	ID=PGSC0003DMG400034639	name=Gene of unknown function	3.52948e+06
ch05	8018695	8022801	8020748	ID=PGSC0003DMG400017005	name=Aldehyde dehydrogenase (NAD+)	3532328
ch05	953352	954405	953878	ID=PGSC0003DMG400025718	name=Conserved gene of unknown function	3.53454e+06
ch05	947967	949032	948500	ID=PGSC0003DMG400025717	name=Flavonol 4'-sulfotransferase	3.53992e+06
ch05	920688	926134	923411	ID=PGSC0003DMG400034336	name=Gene of unknown function	3565009
ch05	916902	918057	917480	ID=PGSC0003DMG400028349	name=Flavonol 4'-sulfotransferase	3.57094e+06
ch05	913306	914298	913802	ID=PGSC0003DMG400046427	name=Flavonol 4'-sulfotransferase	3574618
ch05	910329	911051	910690	ID=PGSC0003DMG400028350	name=Flavonol 4'-sulfotransferase	3577730
ch05	902375	904556	903466	ID=PGSC0003DMG401028300	name=Catalytic/ hydrolase	3.58495e+06
ch05	899883	902416	901150	ID=PGSC0003DMG403028300	name=Conserved gene of unknown function	3.58727e+06
ch05	900360	901841	901100	ID=PGSC0003DMG400045260	name=Conserved gene of unknown function	3.58732e+06
ch05	898300	900241	899270	ID=PGSC0003DMG402028300	name=Catalytic/ hydrolase	3.58915e+06
ch05	892046	893053	892550	ID=PGSC0003DMG400028301	name=Flavonol 4'-sulfotransferase	3.59587e+06
ch05	888804	889802	889303	ID=PGSC0003DMG400028302	name=Flavonol 4'-sulfotransferase	3599117
ch05	884186	885175	884680	ID=PGSC0003DMG400036271	name=Flavonol 4'-sulfotransferase	3.60374e+06
ch05	8094887	8096351	8095619	ID=PGSC0003DMG400040429	name=Spotted leaf protein	3607199
ch05	8096844	8100078	8098461	ID=PGSC0003DMG400030988	name=Serine-threonine protein kinase, plant-type	3610041
ch05	8108580	8109092	8108836	ID=PGSC0003DMG400030975	name=Gene of unknown function	3620416
ch05	864643	867059	865851	ID=PGSC0003DMG400028303	name=Amino acid binding protein	3622569
ch05	852681	858474	855578	ID=PGSC0003DMG400028304	name=Heat shock protein binding protein	3.63284e+06
ch05	845553	849931	847742	ID=PGSC0003DMG400028352	name=Cytochrome P450	3640678
ch05	8131824	8135732	8133778	ID=PGSC0003DMG400030976	name=UDP-N-acetylglucosamine transferase subunit alg13	3645358
ch05	836433	843863	840148	ID=PGSC0003DMG400028305	name=Heat shock protein binding protein	3648272
ch05	8139152	8140385	8.13977e+06	ID=PGSC0003DMG400030989	name=Sentrin/sumo-specific protease	3.65135e+06
ch05	829458	830030	829744	ID=PGSC0003DMG400043194	name=Conserved gene of unknown function	3658676
ch05	820443	821980	821212	ID=PGSC0003DMG400028397	name=Keratin Kb40	3.66721e+06
ch05	816324	817024	816674	ID=PGSC0003DMG400028398	name=Gene of unknown function	3671746
ch05	814122	814910	814516	ID=PGSC0003DMG400028399	name=Gene of unknown function	3673904
ch05	812991	813709	813350	ID=PGSC0003DMG400028354	name=Conserved gene of unknown function	3675070
ch05	808521	809885	809203	ID=PGSC0003DMG400028400	name=Gene of unknown function	3679217
ch05	8164118	8172460	8168289	ID=PGSC0003DMG400030977	name=RNA-binding region RNP-1 and Splicing factor PWI family member protein	3679869
ch05	806233	807062	806648	ID=PGSC0003DMG400028355	name=Gene of unknown function	3.68177e+06
ch05	805139	806034	805586	ID=PGSC0003DMG400028401	name=Gene of unknown function	3.68283e+06
ch05	8172749	8173410	8.17308e+06	ID=PGSC0003DMG400030990	name=ATP binding protein	3.68466e+06
ch05	795309	804595	799952	ID=PGSC0003DMG400028356	name=Nop14	3688468
ch05	8178837	8186133	8182485	ID=PGSC0003DMG400030991	name=Metal-dependent phosphohydrolase HD domain-containing protein	3694065
ch05	787527	789184	788356	ID=PGSC0003DMG400028357	name=Conserved gene of unknown function	3.70006e+06
ch05	8193004	8200744	8196874	ID=PGSC0003DMG400030992	name=Radical SAM domain-containing protein	3708454
ch05	772509	777008	774758	ID=PGSC0003DMG400028306	name=60S ribosomal protein L7a	3.71366e+06
ch05	8201339	8204025	8202682	ID=PGSC0003DMG400030993	name=Conserved gene of unknown function	3714262
ch05	766418	772401	769410	ID=PGSC0003DMG400028358	name=MADS-box transcription factor MADS-MC	3.71901e+06
ch05	757295	763364	760330	ID=PGSC0003DMG400028359	name=MADS-box transcription factor	3.72809e+06
ch05	8215404	8220260	8217832	ID=PGSC0003DMG400030994	name=Polygalacturonase-1 non-catalytic subunit beta	3729412
ch05	8222925	8225436	8.22418e+06	ID=PGSC0003DMG400030995	name=Polygalacturonase-1 non-catalytic subunit beta	3.73576e+06
ch05	735638	737166	736402	ID=PGSC0003DMG400028307	name=Conserved gene of unknown function	3752018
ch05	726140	731011	728576	ID=PGSC0003DMG400028308	name=LIGULELESS1 protein	3.75984e+06
ch05	722262	724857	723560	ID=PGSC0003DMG400028360	name=CRABS CLAW	3.76486e+06
ch05	8252711	8256080	8.2544e+06	ID=PGSC0003DMG400030978	name=Polygalacturonase non-catalytic subunit AroGP2	3.76598e+06
ch05	8260258	8260773	8.26052e+06	ID=PGSC0003DMG400030980	name=Polygalacturonase non-catalytic subunit AroGP3	3.7721e+06
ch05	8259999	8268810	8.2644e+06	ID=PGSC0003DMG400030979	name=Polygalacturonase non-catalytic subunit AroGP3	3.77598e+06
ch05	703501	706000	704750	ID=PGSC0003DMG400028361	name=Alpha-1,4-glucan-protein synthase [UDP-forming] 1	3.78367e+06
ch05	695283	698657	696970	ID=PGSC0003DMG400028310	name=Cytochrome b5 isoform Cb5-D	3791450
ch05	692312	694941	693626	ID=PGSC0003DMG400028362	name=Dihydropterin pyrophosphokinase-dihydropteroate synthase	3.79479e+06
ch05	687342	692019	689680	ID=PGSC0003DMG400028311	name=Fructokinase 2	3.79874e+06
ch05	8290843	8291145	8290994	ID=PGSC0003DMG400031001	name=Gene of unknown function	3802574
ch05	8291731	8292138	8.29193e+06	ID=PGSC0003DMG400031002	name=Gene of unknown function	3.80351e+06
ch05	682307	687002	684654	ID=PGSC0003DMG400028363	name=6-phosphogluconolactonase	3.80377e+06
ch05	668859	673110	670984	ID=PGSC0003DMG400028364	name=Conserved gene of unknown function	3.81744e+06
ch05	8309267	8311664	8.31047e+06	ID=PGSC0003DMG400030981	name=Polygalacturonase non-catalytic subunit AroGP3	3.82205e+06
ch05	8316727	8318224	8.31748e+06	ID=PGSC0003DMG400046129	name=Gene of unknown function	3.82906e+06
ch05	650960	652522	651741	ID=PGSC0003DMG400028312	name=Disease resistance protein	3836679
ch05	644928	648054	646491	ID=PGSC0003DMG401028313	name=Pentatricopeptide repeat-containing protein, chloroplastic	3841929
ch05	641054	644510	642782	ID=PGSC0003DMG402028313	name=Ubiquinone biosynthesis protein	3845638
ch05	637193	640787	638990	ID=PGSC0003DMG400028366	name=SP1L	3849430
ch05	8344302	8346958	8345630	ID=PGSC0003DMG400030982	name=Polygalacturonase non-catalytic subunit AroGP3	3857210
ch05	8354135	8355832	8.35498e+06	ID=PGSC0003DMG400030983	name=Conserved gene of unknown function	3.86656e+06
ch05	8357300	8358240	8357770	ID=PGSC0003DMG400030996	name=Protein phosphatase inhibitor 2 containing protein	3869350
ch05	613047	618053	615550	ID=PGSC0003DMG401028367	name=Esterase PIR7B	3872870
ch05	8360123	8364390	8.36226e+06	ID=PGSC0003DMG400030997	name=Conserved gene of unknown function	3.87384e+06
ch05	610980	612368	611674	ID=PGSC0003DMG402028367	name=Gene of unknown function	3876746
ch05	8367781	8368083	8367932	ID=PGSC0003DMG400031004	name=Conserved gene of unknown function	3879512
ch05	602301	608416	605358	ID=PGSC0003DMG400028368	name=Transitional endoplasmic reticulum ATPase	3.88306e+06
ch05	596200	602161	599180	ID=PGSC0003DMG400028314	name=Asparagine synthetase	3.88924e+06
ch05	8377372	8382917	8.38014e+06	ID=PGSC0003DMG400030984	name=Carbonic anhydrase	3.89172e+06
ch05	8383814	8387263	8.38554e+06	ID=PGSC0003DMG400030998	name=Alcohol dehydrogenase	3.89712e+06
ch05	8388762	8389579	8.38917e+06	ID=PGSC0003DMG401030999	name=Protein disulfide isomerase (PDI) 3	3.90075e+06
ch05	8391812	8392450	8392131	ID=PGSC0003DMG402030999	name=Nucleoredoxin	3903711
ch05	8392953	8396882	8.39492e+06	ID=PGSC0003DMG400031000	name=Nucleoredoxin	3.9065e+06
ch05	576145	581172	578658	ID=PGSC0003DMG400028315	name=Ninja-family protein AFP2	3.90976e+06
ch05	8404032	8405976	8405004	ID=PGSC0003DMG400030985	name=Protein SUPPRESSOR OF GENE SILENCING 3	3916584
ch05	8408839	8409246	8.40904e+06	ID=PGSC0003DMG400030986	name=Leafy cotyledon 1	3.92062e+06
ch05	8410357	8411907	8411132	ID=PGSC0003DMG400030987	name=Ubiquitin-protein ligase	3922712
ch05	8412751	8413440	8.4131e+06	ID=PGSC0003DMG400043334	name=Ubiquitin-protein ligase	3.92468e+06
ch05	557450	567900	562675	ID=PGSC0003DMG400028316	name=Magnesium transporter	3925745
ch05	553932	561693	557812	ID=PGSC0003DMG400028369	name=RNA binding protein	3.93061e+06
ch05	547481	548244	547862	ID=PGSC0003DMG401028370	name=Gene of unknown function	3.94056e+06
ch05	541514	548244	544879	ID=PGSC0003DMG402028370	name=Pentatricopeptide repeat-containing protein	3943541
ch05	534919	540928	537924	ID=PGSC0003DMG400028371	name=Hydrolase	3.9505e+06
ch05	524766	531502	528134	ID=PGSC0003DMG400028317	name=Argininosuccinate synthase	3960286
ch05	522524	523316	522920	ID=PGSC0003DMG400028372	name=Conserved gene of unknown function	3965500
ch05	513228	520543	516886	ID=PGSC0003DMG400028318	name=Conserved gene of unknown function	3.97153e+06
ch05	510404	512898	511651	ID=PGSC0003DMG400028373	name=Nucleotide binding protein	3976769
ch05	505371	509778	507574	ID=PGSC0003DMG400028374	name=Ureide permease	3.98085e+06
ch05	494570	498576	496573	ID=PGSC0003DMG400028375	name=SPFH domain-containing protein 2	3991847
ch05	485548	488341	486944	ID=PGSC0003DMG401028319	name=Alpha/beta hydrolase	4.00148e+06
ch05	8494527	8495513	8495020	ID=PGSC0003DMG400013500	name=Serine-threonine protein kinase, plant-type	4006600
ch05	473553	483489	478521	ID=PGSC0003DMG402028319	name=Alpha/beta hydrolase	4009899
ch05	8499715	8501154	8.50043e+06	ID=PGSC0003DMG400044624	name=Ubiquitin-protein ligase	4.01201e+06
ch05	469830	472983	471406	ID=PGSC0003DMG400028376	name=Hydrolase, hydrolyzing O-glycosyl compounds	4.01701e+06
ch05	458538	463571	461054	ID=PGSC0003DMG400028320	name=Pentatricopeptide repeat-containing protein	4.02737e+06
ch05	455814	457987	456900	ID=PGSC0003DMG400028321	name=Conserved gene of unknown function	4.03152e+06
ch05	8523488	8524975	8.52423e+06	ID=PGSC0003DMG400036109	name=Ubiquitin-protein ligase	4.03581e+06
ch05	445744	449522	447633	ID=PGSC0003DMG400041308	name=Conserved gene of unknown function	4040787
ch05	441491	443777	442634	ID=PGSC0003DMG400042856	name=Conserved gene of unknown function	4045786
ch05	8537653	8539487	8538570	ID=PGSC0003DMG400038306	name=Gene of unknown function	4050150
ch05	432718	436572	434645	ID=PGSC0003DMG400028377	name=14-3-3 protein Lil 1433-3	4053775
ch05	421987	423255	422621	ID=PGSC0003DMG400037551	name=Hcr2-0A	4065799
ch05	8556583	8559010	8.5578e+06	ID=PGSC0003DMG400013471	name=Glycine-rich protein 2	4.06938e+06
ch05	410157	415447	412802	ID=PGSC0003DMG400028378	name=ATP binding protein	4075618
ch05	8570774	8571313	8.57104e+06	ID=PGSC0003DMG400013502	name=Leafy cotyledon 1	4.08262e+06
ch05	401975	405845	403910	ID=PGSC0003DMG400028379	name=Conserved gene of unknown function	4084510
ch05	398400	400187	399294	ID=PGSC0003DMG400028322	name=Cytochrome P450	4.08913e+06
ch05	8576020	8580621	8.57832e+06	ID=PGSC0003DMG400044599	name=Gene of unknown function	4.0899e+06
ch05	8582170	8582655	8.58241e+06	ID=PGSC0003DMG400013503	name=Leafy cotyledon 1	4.09399e+06
ch05	388775	394191	391483	ID=PGSC0003DMG400028380	name=Mitochondrial processing peptidase	4096937
ch05	8588443	8593150	8.5908e+06	ID=PGSC0003DMG400013504	name=Leafy cotyledon1	4.10238e+06
ch05	380155	382380	381268	ID=PGSC0003DMG400028323	name=ZPT4-3	4.10715e+06
ch05	8599340	8599909	8.59962e+06	ID=PGSC0003DMG401013505	name=Leafy cotyledon1	4.1112e+06
ch05	8598930	8603972	8601451	ID=PGSC0003DMG402013505	name=Leafy cotyledon1	4113031
ch05	373547	375586	374566	ID=PGSC0003DMG400028402	name=Gene of unknown function	4.11385e+06
ch05	369472	375911	372692	ID=PGSC0003DMG400028381	name=Transcription factor	4.11573e+06
ch05	8606007	8606832	8.60642e+06	ID=PGSC0003DMG400013472	name=Leafy cotyledon 1	4.118e+06
ch05	8607037	8608018	8.60753e+06	ID=PGSC0003DMG400013526	name=Leafy cotyledon1	4.11911e+06
ch05	8619648	8627296	8623472	ID=PGSC0003DMG400013506	name=Late blight resistance protein homolog R1B-16	4135052
ch05	346678	352885	349782	ID=PGSC0003DMG400028382	name=Alpha-1,4 glucan phosphorylase L-2 isozyme, chloroplastic/amyloplastic	4.13864e+06
ch05	8632422	8637714	8635068	ID=PGSC0003DMG400013473	name=Helix-loop-helix DNA-binding	4146648
ch05	337475	345827	341651	ID=PGSC0003DMG400028324	name=SNAP25 homologous protein SNAP30	4146769
ch05	8639529	8647563	8643546	ID=PGSC0003DMG400013507	name=Gene of unknown function	4155126
ch05	320274	327814	324044	ID=PGSC0003DMG400028325	name=Heparanase	4164376
ch05	320972	321757	321364	ID=PGSC0003DMG400028383	name=Ubiquitin-protein ligase	4.16706e+06
ch05	8659817	8660600	8.66021e+06	ID=PGSC0003DMG400013474	name=Conserved gene of unknown function	4.17179e+06
ch05	311394	315497	313446	ID=PGSC0003DMG400028384	name=Conserved gene of unknown function	4.17497e+06
ch05	8663454	8668307	8.66588e+06	ID=PGSC0003DMG400013475	name=Sentrin/sumo-specific protease, senp8	4.17746e+06
ch05	8669061	8669900	8.66948e+06	ID=PGSC0003DMG400013527	name=Gene of unknown function	4.18106e+06
ch05	304897	308546	306722	ID=PGSC0003DMG400028326	name=Ankyrin repeat family protein	4.1817e+06
ch05	301764	304004	302884	ID=PGSC0003DMG400028327	name=Conserved gene of unknown function	4185536
ch05	8680075	8682306	8.68119e+06	ID=PGSC0003DMG400013476	name=Conserved gene of unknown function	4.19277e+06
ch05	291279	299823	295551	ID=PGSC0003DMG401028328	name=Ganglioside induced differentiation associated protein	4192869
ch05	291279	293145	292212	ID=PGSC0003DMG402028328	name=Gene of unknown function	4196208
ch05	285252	289921	287586	ID=PGSC0003DMG401028329	name=DNA binding protein	4.20083e+06
ch05	281698	284892	283295	ID=PGSC0003DMG402028329	name=Pentatricopeptide repeat-containing protein	4205125
ch05	8701720	8702313	8.70202e+06	ID=PGSC0003DMG400013477	name=Cytochrome P450	4.2136e+06
ch05	270018	278462	274240	ID=PGSC0003DMG401028385	name=Conserved gene of unknown function	4214180
ch05	264025	268975	266500	ID=PGSC0003DMG402028385	name=Conserved gene of unknown function	4221920
ch05	8714120	8715128	8714624	ID=PGSC0003DMG400013508	name=I-box binding factor	4226204
ch05	8717440	8719251	8.71835e+06	ID=PGSC0003DMG400013478	name=Gene of unknown function	4.22993e+06
ch05	8719229	8719843	8719536	ID=PGSC0003DMG400013509	name=Gene of unknown function	4231116
ch05	241441	244352	242896	ID=PGSC0003DMG400028330	name=Transferase, transferring glycosyl groups	4.24552e+06
ch05	237549	239420	238484	ID=PGSC0003DMG400028331	name=Zeatin O-glucosyltransferase	4.24994e+06
ch05	8739993	8740295	8740144	ID=PGSC0003DMG400044548	name=Gene of unknown function	4251724
ch05	232473	234670	233572	ID=PGSC0003DMG400028332	name=Conserved gene of unknown function	4.25485e+06
ch05	8747714	8748036	8747875	ID=PGSC0003DMG400039783	name=Gene of unknown function	4259455
ch05	225615	232261	228938	ID=PGSC0003DMG400028386	name=Conserved gene of unknown function	4259482
ch05	221821	225234	223528	ID=PGSC0003DMG400028387	name=Integral membrane protein	4.26489e+06
ch05	8752163	8754873	8753518	ID=PGSC0003DMG400013510	name=Gene of unknown function	4265098
ch05	216539	216997	216768	ID=PGSC0003DMG400037392	name=Conserved gene of unknown function	4271652
ch05	8759029	8761446	8.76024e+06	ID=PGSC0003DMG400013479	name=Seryl-tRNA synthetase	4.27182e+06
ch05	211228	215102	213165	ID=PGSC0003DMG400028333	name=Plastid division regulator MinE	4275255
ch05	205491	210566	208028	ID=PGSC0003DMG400028334	name=Initiation factor 5a	4.28039e+06
ch05	8769870	8773433	8.77165e+06	ID=PGSC0003DMG400013480	name=Seryl-tRNA synthetase	4.28323e+06
ch05	8776499	8779677	8778088	ID=PGSC0003DMG400013528	name=Non-LTR retroelement reverse transcriptase	4289668
ch05	190450	195591	193020	ID=PGSC0003DMG400028335	name=Transcription factor WRKY2	4.2954e+06
ch05	8782621	8786419	8784520	ID=PGSC0003DMG400013481	name=Conserved gene of unknown function	4296100
ch05	186695	190190	188442	ID=PGSC0003DMG400028388	name=Conserved gene of unknown function	4.29998e+06
ch05	8795562	8796822	8796192	ID=PGSC0003DMG400013482	name=Conserved gene of unknown function	4307772
ch05	165512	172874	169193	ID=PGSC0003DMG400028336	name=Zinc finger protein	4319227
ch05	8807178	8817341	8.81226e+06	ID=PGSC0003DMG400013511	name=Pantothenate kinase family protein	4.32384e+06
ch05	163262	165199	164230	ID=PGSC0003DMG400028389	name=Conserved gene of unknown function	4.32419e+06
ch05	159074	162438	160756	ID=PGSC0003DMG400028390	name=Gene of unknown function	4327664
ch05	157329	158752	158040	ID=PGSC0003DMG400028337	name=Gene of unknown function	4.33038e+06
ch05	154976	155923	155450	ID=PGSC0003DMG400046292	name=Conserved gene of unknown function	4.33297e+06
ch05	153036	154176	153606	ID=PGSC0003DMG400028404	name=Conserved gene of unknown function	4334814
ch05	149896	150972	150434	ID=PGSC0003DMG400028338	name=Conserved gene of unknown function	4337986
ch05	8829623	8831150	8.83039e+06	ID=PGSC0003DMG400013512	name=Conserved gene of unknown function	4.34197e+06
ch05	143384	148631	146008	ID=PGSC0003DMG400028339	name=Late blight resistance protein	4.34241e+06
ch05	8832695	8833811	8833253	ID=PGSC0003DMG400013529	name=Gene of unknown function	4344833
ch05	141901	142331	142116	ID=PGSC0003DMG400028405	name=Gene of unknown function	4346304
ch05	138221	143689	140955	ID=PGSC0003DMG400028391	name=Pentatricopeptide repeat-containing protein	4347465
ch05	8837424	8838881	8.83815e+06	ID=PGSC0003DMG400013513	name=Conserved gene of unknown function	4.34973e+06
ch05	133917	138065	135991	ID=PGSC0003DMG401028340	name=Protein UXT	4352429
ch05	127550	133352	130451	ID=PGSC0003DMG402028340	name=Conserved gene of unknown function	4357969
ch05	8844712	8850667	8.84769e+06	ID=PGSC0003DMG400013483	name=ATP binding protein	4.35927e+06
ch05	125124	127136	126130	ID=PGSC0003DMG403028340	name=Flavonol 4'-sulfotransferase	4362290
ch05	116536	118514	117525	ID=PGSC0003DMG400028341	name=Flavonol 4'-sulfotransferase	4370895
ch05	115019	115744	115382	ID=PGSC0003DMG400028392	name=Xyloglucan 6-xylosyltransferase	4.37304e+06
ch05	107703	114479	111091	ID=PGSC0003DMG400028342	name=26S proteasome subunit S9	4377329
ch05	8864326	8868536	8866431	ID=PGSC0003DMG400013484	name=Pyroglutamyl-peptidase I	4378011
ch05	8869309	8872830	8.87107e+06	ID=PGSC0003DMG400013514	name=ADP-ribosylation factor	4.38265e+06
ch05	99118	106936	103027	ID=PGSC0003DMG400028343	name=Pattern formation protein	4385393
ch05	8873846	8878416	8876131	ID=PGSC0003DMG400013515	name=Naphthoate synthase	4387711
ch05	95189	98577	96883	ID=PGSC0003DMG400028344	name=Vesicle transport V-snare protein vti1a	4391537
ch05	8882392	8885738	8884065	ID=PGSC0003DMG400013516	name=Polygalacturonase	4395645
ch05	89968	94476	92222	ID=PGSC0003DMG400028345	name=Conserved gene of unknown function	4396198
ch05	82985	88504	85744.5	ID=PGSC0003DMG400028346	name=Integrin-linked protein kinase	4.40268e+06
ch05	79707	82751	81229	ID=PGSC0003DMG400028393	name=Transmembrane emp24 domain-containing protein 10	4407191
ch05	70562	74866	72714	ID=PGSC0003DMG400028347	name=Axi 1 protein from Nicotiana tabacum	4415706
ch05	68265	72989	70627	ID=PGSC0003DMG400028394	name=Ribulose-1,5 bisphosphate carboxylase/oxygenase large subunit N-methyltransferase, chloroplastic	4417793
ch05	63123	67842	65482.5	ID=PGSC0003DMG400028348	name=Ribulose-1,5 bisphosphate carboxylase/oxygenase large subunit N-methyltransferase, chloroplastic	4.42294e+06
ch05	8912492	8913378	8912935	ID=PGSC0003DMG400036464	name=Gene of unknown function	4424515
ch05	59933	60828	60380.5	ID=PGSC0003DMG400028395	name=Conserved gene of unknown function	4.42804e+06
ch05	53768	59724	56746	ID=PGSC0003DMG400028396	name=Phosphate transporter PHO1 homolog 10	4431674
ch05	8928724	8930790	8929757	ID=PGSC0003DMG400047041	name=Gene of unknown function	4441337
ch05	45713	46189	45951	ID=PGSC0003DMG400005569	name=Retroelement	4442469
ch05	38295	38843	38569	ID=PGSC0003DMG400005564	name=Ribosomal protein L32	4449851
ch05	33601	38603	36102	ID=PGSC0003DMG400005565	name=Pentatricopeptide repeat-containing protein	4452318
ch05	34920	35433	35176.5	ID=PGSC0003DMG400005566	name=Gene of unknown function	4.45324e+06
ch05	29394	32179	30786.5	ID=PGSC0003DMG400005563	name=Acyltransferase	4.45763e+06
ch05	8955439	8955840	8.95564e+06	ID=PGSC0003DMG400041786	name='chromo' domain containing protein	4.46722e+06
ch05	8974024	8980534	8977279	ID=PGSC0003DMG400013485	name=ATP-citrate synthase	4488859
ch05	8978257	8978664	8.97846e+06	ID=PGSC0003DMG401013517	name=Conserved gene of unknown function	4.49004e+06
ch05	8981205	8982062	8.98163e+06	ID=PGSC0003DMG403013517	name=Polyprotein	4.49321e+06
ch05	8990788	8991533	8.99116e+06	ID=PGSC0003DMG402013517	name=Gene of unknown function	4.50274e+06
ch05	9020646	9026828	9023737	ID=PGSC0003DMG400013486	name=Disease resistance protein	4535317
ch05	9042514	9043843	9.04318e+06	ID=PGSC0003DMG400013487	name=Gene of unknown function	4.55476e+06
ch05	9065839	9067059	9066449	ID=PGSC0003DMG400013533	name=Flavonol 4'-sulfotransferase	4578029
ch05	9111929	9113418	9.11267e+06	ID=PGSC0003DMG400013488	name=F-box/kelch protein	4.62425e+06
ch05	9119072	9119692	9119382	ID=PGSC0003DMG400038329	name=Plant disease resistant protein	4630962
ch05	9131587	9137722	9.13465e+06	ID=PGSC0003DMG400013489	name=Leucine-rich repeat receptor-like kinase	4.64623e+06
ch05	9139914	9148796	9144355	ID=PGSC0003DMG400013490	name=Prf	4655935
ch05	9154222	9154647	9.15443e+06	ID=PGSC0003DMG400013518	name=Gene of unknown function	4.66601e+06
ch05	9164717	9167941	9166329	ID=PGSC0003DMG400013519	name=Ubiquitin-protein ligase	4677909
ch05	9172804	9178547	9.17568e+06	ID=PGSC0003DMG400013491	name=F-Box protein	4.68726e+06
ch05	9199239	9203522	9.20138e+06	ID=PGSC0003DMG400013492	name=Lustrin A	4.71296e+06
ch05	9248324	9258140	9253232	ID=PGSC0003DMG400013493	name=POTH1	4764812
ch05	9273070	9278152	9275611	ID=PGSC0003DMG400013520	name=F-Box protein	4787191
ch05	9282913	9285557	9284235	ID=PGSC0003DMG400013494	name=Conserved gene of unknown function	4795815
ch05	9286020	9287205	9.28661e+06	ID=PGSC0003DMG400013521	name=Gene of unknown function	4.79819e+06
ch05	9287253	9287645	9287449	ID=PGSC0003DMG402013522	name=PRF	4799029
ch05	9287263	9291478	9.28937e+06	ID=PGSC0003DMG401013522	name=Prf	4.80095e+06
ch05	9324497	9325042	9.32477e+06	ID=PGSC0003DMG400035463	name=Type I MADS box transcription factor	4.83635e+06
ch05	9393001	9393575	9393288	ID=PGSC0003DMG400042538	name=Gene of unknown function	4904868
ch05	9401791	9403597	9402694	ID=PGSC0003DMG400013495	name=Pto-like serine/threonine kinase	4914274
ch05	9404647	9407789	9406218	ID=PGSC0003DMG400013523	name=Endo-1,4-beta-glucanase	4917798
ch05	9431473	9432018	9.43175e+06	ID=PGSC0003DMG400039605	name=Gene of unknown function	4.94333e+06
ch05	9433047	9435135	9434091	ID=PGSC0003DMG400041677	name=Gene of unknown function	4945671
ch05	9453059	9457342	9.4552e+06	ID=PGSC0003DMG400013524	name=Protein kinase family protein	4.96678e+06
ch05	9465568	9469319	9.46744e+06	ID=PGSC0003DMG400013525	name=Kinase	4.97902e+06

## Sheet: Mn Candidate genes
Supplementary Table 5: The genes retrieved from the potato reference genome to find possible candidate genes from the QTL's genomic regions spanning upto 5 Mbp for Mn
chr	start	end	mid	ID	Name	hit_dist
ch05	49736156	49738028	49737092	ID=PGSC0003DMG400008445	name=60S ribosomal protein L6	6556
ch05	49742234	49750600	49746417	ID=PGSC0003DMG400008462	name=E3 ubiquitin-protein ligase UPL5	15881
ch05	49711046	49716205	4.97136e+07	ID=PGSC0003DMG400008447	name=Transmembrane transporter	16910.5
ch05	49753260	49754880	49754070	ID=PGSC0003DMG400008444	name=Induced stolon tip protein	23534
ch05	49762485	49766599	49764542	ID=PGSC0003DMG400008443	name=Protein pob	34006
ch05	49768383	49773709	49771046	ID=PGSC0003DMG400008461	name=Pollen tube RhoGDI2	40510
ch05	49687693	49688942	4.96883e+07	ID=PGSC0003DMG400008449	name=NBS-LRR resistance protein	42218.5
ch05	49686568	49687623	4.96871e+07	ID=PGSC0003DMG400008450	name=NBS-LRR resistance protein	43440.5
ch05	49774946	49775670	49775308	ID=PGSC0003DMG400008460	name=Cystatin	44772
ch05	49778084	49784845	4.97815e+07	ID=PGSC0003DMG400008459	name=Calcium-binding protein	50928.5
ch05	49785939	49791294	4.97886e+07	ID=PGSC0003DMG400008458	name=Nucleic acid-binding, OB-fold	58080.5
ch05	49792603	49798726	4.97957e+07	ID=PGSC0003DMG400008457	name=Guanine nucleotide regulatory protein	65128.5
ch05	49800414	49801028	49800721	ID=PGSC0003DMG400008469	name=Gene of unknown function	70185
ch05	49804042	49813842	49808942	ID=PGSC0003DMG400008442	name=SCL domain class transcription factor	78406
ch05	49829199	49829916	4.98296e+07	ID=PGSC0003DMG400008468	name=Conserved gene of unknown function	99021.5
ch05	49834640	49841056	49837848	ID=PGSC0003DMG400008456	name=OBERON	107312
ch05	49847038	49852007	4.98495e+07	ID=PGSC0003DMG400008455	name=UPF0497 membrane protein 12	118986
ch05	49849727	49850756	4.98502e+07	ID=PGSC0003DMG400008466	name=Gene of unknown function	119706
ch05	49852943	49860987	49856965	ID=PGSC0003DMG400008454	name=Transcriptional adaptor	126429
ch05	49863792	49864724	49864258	ID=PGSC0003DMG400008453	name=Conserved gene of unknown function	133722
ch05	49867614	49869528	49868571	ID=PGSC0003DMG400008441	name=Proline-rich protein	138035
ch05	49585643	49586245	49585944	ID=PGSC0003DMG400026795	name=Plant resistance protein	144592
ch05	49875563	49881769	49878666	ID=PGSC0003DMG400008440	name=AKIN beta2	148130
ch05	49883997	49891295	49887646	ID=PGSC0003DMG400008439	name=Mutt domain protein	157110
ch05	49563732	49566402	49565067	ID=PGSC0003DMG400026798	name=Gene of unknown function	165469
ch05	49894328	49903390	49898859	ID=PGSC0003DMG400008452	name=Protein arginine n-methyltransferase	168323
ch05	49903753	49905385	49904569	ID=PGSC0003DMG400008438	name=Metal ion binding protein	174033
ch05	49907542	49916110	49911826	ID=PGSC0003DMG400008437	name=Internal-motor kinesin	181290
ch05	49923277	49925184	4.99242e+07	ID=PGSC0003DMG400008451	name=Fiber protein Fb19	193694
ch05	49928664	49929696	49929180	ID=PGSC0003DMG400043366	name=Gene of unknown function	198644
ch05	49936705	49938400	4.99376e+07	ID=PGSC0003DMG400038819	name=Zinc finger family protein	207016
ch05	49508114	49508674	49508394	ID=PGSC0003DMG400013084	name=Late blight resistance protein Rpi-blb2	222142
ch05	49471044	49473199	4.94721e+07	ID=PGSC0003DMG400013081	name=Cysteine-rich extensin-2	258414
ch05	49467002	49470898	49468950	ID=PGSC0003DMG401013075	name=Conserved gene of unknown function	261586
ch05	49467957	49468709	49468333	ID=PGSC0003DMG402013075	name=Conserved gene of unknown function	262203
ch05	49460359	49466079	49463219	ID=PGSC0003DMG400013080	name=GTP-binding protein	267317
ch05	49456355	49457581	49456968	ID=PGSC0003DMG400013074	name=Triacylglycerol lipase	273568
ch05	49449892	49451100	49450496	ID=PGSC0003DMG400013079	name=Triacylglycerol lipase	280040
ch05	49441105	49442292	4.94417e+07	ID=PGSC0003DMG400013078	name=Triacylglycerol lipase	288838
ch05	49428714	49437016	49432865	ID=PGSC0003DMG400013076	name=Aspartic proteinase nepenthesin-1	297671
ch05	50028363	50033643	50031003	ID=PGSC0003DMG400042060	name=Gene of unknown function	300467
ch05	49425268	49427165	4.94262e+07	ID=PGSC0003DMG400013077	name=UDP-glucosyltransferase	304320
ch05	50035550	50037342	50036446	ID=PGSC0003DMG400023537	name=Chaperone protein dnaJ	305910
ch05	49418751	49424526	4.94216e+07	ID=PGSC0003DMG400013073	name=Conserved gene of unknown function	308898
ch05	50038295	50043014	5.00407e+07	ID=PGSC0003DMG400023536	name=Eukaryotic translation initiation factor 2 gamma subunit	310118
ch05	50053867	50061080	5.00575e+07	ID=PGSC0003DMG402023438	name=Epoxide hydrolase	326938
ch05	50066047	50069936	5.0068e+07	ID=PGSC0003DMG401023438	name=Epoxide hydrolase	337456
ch05	50074879	50075446	5.00752e+07	ID=PGSC0003DMG400023437	name=Pectinesterase	344626
ch05	50077953	50086958	5.00825e+07	ID=PGSC0003DMG400023436	name=IBR3 (IBA-RESPONSE 3)	351920
ch05	50094387	50094932	5.00947e+07	ID=PGSC0003DMG400023535	name=Gene of unknown function	364124
ch05	49366117	49366670	4.93664e+07	ID=PGSC0003DMG400015763	name=Gene of unknown function	364142
ch05	50100346	50101761	5.01011e+07	ID=PGSC0003DMG400023435	name=Major allergen Pru ar	370518
ch05	49357280	49361004	49359142	ID=PGSC0003DMG400015750	name=RNase H family protein	371394
ch05	49350784	49356735	4.93538e+07	ID=PGSC0003DMG400015742	name=Copine I	376776
ch05	49346244	49346849	4.93465e+07	ID=PGSC0003DMG400015764	name=Sugar transporter	383990
ch05	50112914	50120114	50116514	ID=PGSC0003DMG400023534	name=Type-B response regulator	385978
ch05	50120802	50123114	50121958	ID=PGSC0003DMG400023434	name=GATA transcription factor 15	391422
ch05	49338532	49339213	4.93389e+07	ID=PGSC0003DMG400015765	name=Sugar transporter	391664
ch05	50125364	50128461	5.01269e+07	ID=PGSC0003DMG402023433	name=ATP binding protein	396376
ch05	50135192	50138300	50136746	ID=PGSC0003DMG401023433	name=MYB-like DNA-binding domain protein	406210
ch05	50142804	50148133	5.01455e+07	ID=PGSC0003DMG400023432	name=Telomere binding protein	414932
ch05	50156099	50165175	50160637	ID=PGSC0003DMG400023431	name=XH/XS domain-containing protein	430101
ch05	50165885	50166962	5.01664e+07	ID=PGSC0003DMG400023548	name=Conserved gene of unknown function	435888
ch05	50171921	50176728	5.01743e+07	ID=PGSC0003DMG402023533	name=DNA replication complex GINS protein PSF2	443788
ch05	49274603	49287550	4.92811e+07	ID=PGSC0003DMG400015752	name=O-linked n-acetylglucosamine transferase, ogt	449460
ch05	50176935	50183852	5.01804e+07	ID=PGSC0003DMG401023533	name=Beta-glucosidase 08	449858
ch05	50187939	50188969	50188454	ID=PGSC0003DMG400023532	name=Conserved gene of unknown function	457918
ch05	49262635	49270733	49266684	ID=PGSC0003DMG400015743	name=Protein transport protein sec23	463852
ch05	50195548	50200187	5.01979e+07	ID=PGSC0003DMG400023531	name=Dolichyl-phosphate beta-glucosyltransferase	467332
ch05	49259279	49261422	4.92604e+07	ID=PGSC0003DMG400015744	name=O-glucosyltransferase 2	470186
ch05	49248186	49251935	4.92501e+07	ID=PGSC0003DMG400015745	name=Serine hydroxymethyltransferase	480476
ch05	50214463	50217318	5.02159e+07	ID=PGSC0003DMG400023530	name=Death-inducer obliterator 1	485354
ch05	50239220	50244722	50241971	ID=PGSC0003DMG400023430	name=F-box family protein	511435
ch05	50245290	50248122	50246706	ID=PGSC0003DMG400023429	name=Actin-58	516170
ch05	50250125	50254609	50252367	ID=PGSC0003DMG400023428	name=TSC13 protein	521831
ch05	49203234	49204538	49203886	ID=PGSC0003DMG400015746	name=NAD dependent epimerase	526650
ch05	50255299	50260421	50257860	ID=PGSC0003DMG400023427	name=Zinc finger protein	527324
ch05	49198694	49201840	49200267	ID=PGSC0003DMG400015754	name=RNA binding protein	530269
ch05	50263610	50264272	50263941	ID=PGSC0003DMG400023529	name=Conserved gene of unknown function	533405
ch05	50266165	50267776	5.0267e+07	ID=PGSC0003DMG400023426	name=Zinc finger protein	536434
ch05	49184749	49193606	4.91892e+07	ID=PGSC0003DMG400015747	name=DNA binding protein	541358
ch05	50274831	50282378	5.02786e+07	ID=PGSC0003DMG400023528	name=Geranylgeranyltransferase type I beta subunit	548068
ch05	49177058	49180082	49178570	ID=PGSC0003DMG400015755	name=DnaJ isoform	551966
ch05	50284561	50286029	50285295	ID=PGSC0003DMG400023425	name=Conserved gene of unknown function	554759
ch05	50290827	50295873	50293350	ID=PGSC0003DMG402023527	name=Ubiquitin carrier protein	562814
ch05	49159377	49165698	4.91625e+07	ID=PGSC0003DMG400035768	name=Triacylglycerol lipase 2	567998
ch05	50299232	50304599	5.03019e+07	ID=PGSC0003DMG401023527	name=Ubiquitin carrier protein	571380
ch05	49152694	49158166	49155430	ID=PGSC0003DMG400015748	name=ATCES1	575106
ch05	50307271	50309021	50308146	ID=PGSC0003DMG400023526	name=UPF0497 membrane protein 3	577610
ch05	49149263	49152201	49150732	ID=PGSC0003DMG400015756	name=Conserved gene of unknown function	579804
ch05	50311348	50319086	50315217	ID=PGSC0003DMG400023525	name=CRAL/TRIO domain containing protein	584681
ch05	49141397	49148480	4.91449e+07	ID=PGSC0003DMG400015749	name=DUF246 domain-containing protein	585598
ch05	50320934	50323355	5.03221e+07	ID=PGSC0003DMG400023424	name=P0 ribosomal protein	591608
ch05	49131468	49141319	4.91364e+07	ID=PGSC0003DMG400015757	name=RabGAP/TBC domain-containing protein	594142
ch05	50334833	50338545	50336689	ID=PGSC0003DMG400023524	name=UDP-glucuronate decarboxylase 1	606153
ch05	49123329	49124945	49124137	ID=PGSC0003DMG400015758	name=ATP binding protein	606399
ch05	49118009	49122396	4.91202e+07	ID=PGSC0003DMG401015759	name=Ubiquitin carboxyl-terminal hydrolase	610334
ch05	50339159	50347145	50343152	ID=PGSC0003DMG400023422	name=Methionyl-tRNA synthetase (AtcpMetRS)	612616
ch05	50351071	50351602	5.03513e+07	ID=PGSC0003DMG400023523	name=Histone H4	620800
ch05	50353110	50353515	5.03533e+07	ID=PGSC0003DMG400023522	name=Histone H4	622776
ch05	49105830	49108261	4.9107e+07	ID=PGSC0003DMG402015759	name=60S ribosomal protein L13a	623490
ch05	49098850	49102347	4.91006e+07	ID=PGSC0003DMG400015760	name=Transcription factor FAMA	629938
ch05	50362144	50368567	5.03654e+07	ID=PGSC0003DMG400044579	name=Gene of unknown function	634820
ch05	49089603	49097664	4.90936e+07	ID=PGSC0003DMG400015761	name=26S proteasome subunit RPN2a	636902
ch05	49084498	49085951	4.90852e+07	ID=PGSC0003DMG400042553	name=F-box domain-containing protein	645312
ch05	49082160	49083623	4.90829e+07	ID=PGSC0003DMG400015762	name=Oligopeptide transporter OPT family	647644
ch05	50381593	50386036	5.03838e+07	ID=PGSC0003DMG400023521	name=Amino acid binding protein	653278
ch05	50386931	50394297	50390614	ID=PGSC0003DMG400023520	name=Aba-overly sensitive 1	660078
ch05	50395499	50402243	50398871	ID=PGSC0003DMG400023519	name=2-oxoglutarate dehydrogenase	668335
ch05	50408989	50409615	50409302	ID=PGSC0003DMG400023518	name=ZPT2-14	678766
ch05	49049885	49051148	4.90505e+07	ID=PGSC0003DMG400013111	name=Ubiquitin-protein ligase	680020
ch05	49046980	49048304	49047642	ID=PGSC0003DMG400013115	name=Lectin	682894
ch05	50414337	50415010	5.04147e+07	ID=PGSC0003DMG400023547	name=ZPT2-14	684138
ch05	49044450	49045718	49045084	ID=PGSC0003DMG400013116	name=Tom	685452
ch05	50431499	50434660	5.04331e+07	ID=PGSC0003DMG400023419	name=Receptor kinase THESEUS 1	702544
ch05	49017241	49024595	49020918	ID=PGSC0003DMG401013112	name=Pleiotropic drug resistance protein 1	709618
ch05	50449917	50455079	50452498	ID=PGSC0003DMG400023418	name=Phosphatase	721962
ch05	48997815	49006779	49002297	ID=PGSC0003DMG402013112	name=Pleiotropic drug resistance protein 1	728239
ch05	48992723	48993463	48993093	ID=PGSC0003DMG400013114	name=Pleiotropic drug resistance protein 1	737443
ch05	50475439	50479825	50477632	ID=PGSC0003DMG400023517	name=Tic20	747096
ch05	50482662	50488463	5.04856e+07	ID=PGSC0003DMG400023516	name=Cation efflux protein/ zinc transporter	755026
ch05	50492402	50501214	50496808	ID=PGSC0003DMG400023515	name=Sulfate transporter	766272
ch05	50504923	50505386	5.05052e+07	ID=PGSC0003DMG400023546	name=Gene of unknown function	774618
ch05	50504565	50506779	50505672	ID=PGSC0003DMG400023514	name=Conserved gene of unknown function	775136
ch05	50507632	50514220	50510926	ID=PGSC0003DMG400023416	name=Dehydroascorbate reductase	780390
ch05	50519937	50524321	50522129	ID=PGSC0003DMG400023513	name=Phosphatidylinositol n-acetylglucosaminyltransferase subunit p	791593
ch05	50524446	50526349	5.05254e+07	ID=PGSC0003DMG400023415	name=Conserved gene of unknown function	794862
ch05	48930056	48932699	4.89314e+07	ID=PGSC0003DMG400019166	name=PDR-type ABC transporter 2	799158
ch05	50526432	50534174	50530303	ID=PGSC0003DMG400023414	name=LEM3 (Ligand-effect modulator 3) family protein	799767
ch05	48922176	48923669	4.89229e+07	ID=PGSC0003DMG400019218	name=Retroelement pol polyprotein	807614
ch05	50537129	50539408	5.05383e+07	ID=PGSC0003DMG400023512	name=60S ribosomal protein L35	807732
ch05	48918234	48921168	48919701	ID=PGSC0003DMG400019165	name=PDR-type ABC transporter 2	810835
ch05	50543421	50545619	50544520	ID=PGSC0003DMG400023511	name=ATEXO70H2	813984
ch05	48910277	48917779	48914028	ID=PGSC0003DMG400019113	name=Methionyl-tRNA synthetase	816508
ch05	50549271	50554522	5.05519e+07	ID=PGSC0003DMG400023510	name=Ankyrin repeat-containing protein	821360
ch05	48901437	48905945	48903691	ID=PGSC0003DMG400019164	name=Cellulose synthase A catalytic subunit 1 [UDP-forming]	826845
ch05	50558320	50562244	50560282	ID=PGSC0003DMG400023509	name=Conserved gene of unknown function	829746
ch05	48894539	48897558	4.8896e+07	ID=PGSC0003DMG400019112	name=Conserved gene of unknown function	834488
ch05	50566043	50567525	50566784	ID=PGSC0003DMG400023413	name=Conserved gene of unknown function	836248
ch05	48891368	48892970	48892169	ID=PGSC0003DMG400019111	name=S-adenosyl-L-methionine:salicylic acid carboxyl methyltransferase 1	838367
ch05	48886960	48888729	4.88878e+07	ID=PGSC0003DMG400019110	name=Chalcone synthase 2	842692
ch05	50582101	50585071	50583586	ID=PGSC0003DMG400023508	name=Kinase	853050
ch05	48871388	48878815	4.88751e+07	ID=PGSC0003DMG400019163	name=Dihydroxy-acid dehydratase	855434
ch05	50586263	50590893	50588578	ID=PGSC0003DMG400023507	name=Conserved gene of unknown function	858042
ch05	48865165	48866694	4.88659e+07	ID=PGSC0003DMG400019162	name=9-cis-epoxycarotenoid dioxygenase	864606
ch05	48851851	48854418	4.88531e+07	ID=PGSC0003DMG400019109	name=Delta DNA polymerase	877402
ch05	50606922	50609932	50608427	ID=PGSC0003DMG400023506	name=ATP-binding cassette transporter	877891
ch05	50613212	50614396	50613804	ID=PGSC0003DMG400023505	name=Blue copper protein	883268
ch05	50636730	50640659	5.06387e+07	ID=PGSC0003DMG402023504	name=Arginine/serine-rich splicing factor	908158
ch05	50644192	50649651	5.06469e+07	ID=PGSC0003DMG401023504	name=ATP binding protein	916386
ch05	50650223	50656877	50653550	ID=PGSC0003DMG400023411	name=Nitrilase and fragile histidine triad fusion protein	923014
ch05	50657991	50665207	50661599	ID=PGSC0003DMG400023503	name=Peroxin 12	931063
ch05	50666357	50669897	50668127	ID=PGSC0003DMG400023502	name=DAG protein, chloroplast	937591
ch05	50670398	50676166	50673282	ID=PGSC0003DMG400023410	name=Ankyrin repeat protein	942746
ch05	48779009	48780523	48779766	ID=PGSC0003DMG400027218	name=DNA-directed RNA polymerases II 24 kDa polypeptide	950770
ch05	48776029	48778625	48777327	ID=PGSC0003DMG400027167	name=AG-motif binding protein-2	953209
ch05	48770097	48772604	4.87714e+07	ID=PGSC0003DMG402027166	name=Transferase, transferring glycosyl groups	959186
ch05	48766148	48772535	4.87693e+07	ID=PGSC0003DMG401027166	name=Transferase, transferring glycosyl groups	961194
ch05	48761783	48765391	48763587	ID=PGSC0003DMG400027217	name=Hydroxyethylthiazole kinase	966949
ch05	48761813	48763509	48762661	ID=PGSC0003DMG402027165	name=Hydroxyethylthiazole kinase	967875
ch05	48754798	48761681	4.87582e+07	ID=PGSC0003DMG401027165	name=Chaperonin-60kD, ch60	972296
ch05	50701496	50705153	5.07033e+07	ID=PGSC0003DMG400023408	name=Structural constituent of ribosome	972788
ch05	50716974	50718353	5.07177e+07	ID=PGSC0003DMG400023544	name=Conserved gene of unknown function	987128
ch05	50718608	50723206	50720907	ID=PGSC0003DMG400023407	name=Rrm-containing protein	990371
ch05	50730131	50733129	50731630	ID=PGSC0003DMG400023406	name=Light-dependent short hypocotyls 1	1001094
ch05	50736152	50739653	5.07379e+07	ID=PGSC0003DMG400023405	name=Protein 2	1.00737e+06
ch05	50744354	50752421	5.07484e+07	ID=PGSC0003DMG400023500	name=Glycogenin	1.01785e+06
ch05	48704767	48705919	48705343	ID=PGSC0003DMG400027164	name=LEA III protein isoform 2	1025193
ch05	48702141	48704053	48703097	ID=PGSC0003DMG400027216	name=Oligopeptide transporter OPT family	1027439
ch05	48695377	48696691	48696034	ID=PGSC0003DMG400027215	name=Dihydrolipoyl dehydrogenase	1034502
ch05	50764686	50766166	50765426	ID=PGSC0003DMG400023404	name=PEP carboxylase kinase	1034890
ch05	48689534	48690292	48689913	ID=PGSC0003DMG401027214	name=Oligopeptide transporter	1040623
ch05	48688300	48689322	48688811	ID=PGSC0003DMG402027214	name=Oligopeptide transporter OPT family	1041725
ch05	48686720	48687283	4.8687e+07	ID=PGSC0003DMG400027163	name=Zeatin O-xylosyltransferase	1.04353e+06
ch05	50770476	50777992	50774234	ID=PGSC0003DMG400023403	name=Serine/threonine-protein phosphatase	1043698
ch05	48686110	48686604	48686357	ID=PGSC0003DMG400027162	name=UDP-glucosyltransferase	1044179
ch05	48684046	48685234	48684640	ID=PGSC0003DMG400027161	name=60S ribosomal protein L29	1045896
ch05	48679282	48683357	4.86813e+07	ID=PGSC0003DMG400027213	name=DNA-directed RNA polymerase subunit	1.04922e+06
ch05	48677406	48679067	4.86782e+07	ID=PGSC0003DMG400027160	name=DELLA protein RGL1	1.0523e+06
ch05	50783752	50787902	50785827	ID=PGSC0003DMG400023402	name=Ethylene receptor	1055291
ch05	48669911	48675060	4.86725e+07	ID=PGSC0003DMG400027212	name=ATP:citrate lyase	1.05805e+06
ch05	50792817	50793332	5.07931e+07	ID=PGSC0003DMG400023543	name=Conserved gene of unknown function	1.06254e+06
ch05	48658260	48663675	4.8661e+07	ID=PGSC0003DMG400027211	name=Phytochrome B2	1.06957e+06
ch05	48654382	48655074	48654728	ID=PGSC0003DMG401027210	name=UDP-glucosyltransferase	1075808
ch05	48653517	48655143	48654330	ID=PGSC0003DMG402027210	name=Glucosyltransferase	1076206
ch05	48642191	48647798	4.8645e+07	ID=PGSC0003DMG400027209	name=Prefoldin subunit	1.08554e+06
ch05	48637085	48638531	48637808	ID=PGSC0003DMG400027208	name=WRKY transcription factor	1092728
ch05	48633733	48635684	4.86347e+07	ID=PGSC0003DMG400027159	name=ZIP transporter	1.09583e+06
ch05	48629307	48632235	48630771	ID=PGSC0003DMG400027207	name=Conserved gene of unknown function	1099765
ch05	48626225	48627350	4.86268e+07	ID=PGSC0003DMG400027158	name=Conserved gene of unknown function	1.10375e+06
ch05	48613702	48620309	4.8617e+07	ID=PGSC0003DMG400027206	name=Gibberellin 2-oxidase	1.11353e+06
ch05	48603078	48605136	48604107	ID=PGSC0003DMG400027157	name=R2R3 transcription factor MYB108 1	1126429
ch05	50860359	50865237	50862798	ID=PGSC0003DMG400023499	name=Proteophosphoglycan ppg4	1132262
ch05	50869211	50870694	5.087e+07	ID=PGSC0003DMG400035890	name=UPF0497 membrane protein PIMP1	1.13942e+06
ch05	48582146	48585617	4.85839e+07	ID=PGSC0003DMG400027205	name=Protein Pop3	1.14665e+06
ch05	50876142	50880549	5.08783e+07	ID=PGSC0003DMG400023400	name=DnaJ	1.14781e+06
ch05	48576471	48581269	48578870	ID=PGSC0003DMG400027156	name=Dihydrolipoyl dehydrogenase	1151666
ch05	48571907	48574408	4.85732e+07	ID=PGSC0003DMG400027155	name=Protein phosphatase 2c	1.15738e+06
ch05	50887541	50891596	5.08896e+07	ID=PGSC0003DMG400023399	name=Charged multivesicular body protein	1.15903e+06
ch05	50892333	50895970	5.08942e+07	ID=PGSC0003DMG400023398	name=Pyridine nucleotide-disulfide oxidoreductase family protein	1.16362e+06
ch05	48562766	48568764	48565765	ID=PGSC0003DMG400027154	name=Beta-1,3-galactosyltransferase 16	1164771
ch05	50896964	50898727	5.08978e+07	ID=PGSC0003DMG400023397	name=Conserved gene of unknown function	1.16731e+06
ch05	50899534	50902248	50900891	ID=PGSC0003DMG400023498	name=Leucine-rich repeat receptor protein kinase EXS	1170355
ch05	50903007	50906084	5.09045e+07	ID=PGSC0003DMG400023396	name=Leucine-rich repeat receptor protein kinase EXS	1.17401e+06
ch05	50907838	50911260	50909549	ID=PGSC0003DMG400023497	name=Conserved gene of unknown function	1179013
ch05	48539197	48541710	4.85405e+07	ID=PGSC0003DMG400027152	name=Conserved gene of unknown function	1.19008e+06
ch05	50919835	50923610	5.09217e+07	ID=PGSC0003DMG400023496	name=Eukaryotic peptide chain release factor subunit 1-3	1.19119e+06
ch05	48527855	48537675	48532765	ID=PGSC0003DMG400027151	name=Squamosa promoter-binding protein	1197771
ch05	50927918	50928780	50928349	ID=PGSC0003DMG400023395	name=Conserved gene of unknown function	1197813
ch05	50934441	50937357	50935899	ID=PGSC0003DMG400023394	name=40S ribosomal protein S17	1205363
ch05	50938419	50941939	50940179	ID=PGSC0003DMG400023495	name=I-box binding factor	1209643
ch05	50942194	50945204	50943699	ID=PGSC0003DMG400023393	name=ATPase inhibitor	1213163
ch05	50945739	50948895	50947317	ID=PGSC0003DMG400023392	name=Small nuclear ribonucleoprotein E	1216781
ch05	48506310	48512112	48509211	ID=PGSC0003DMG400027204	name=Pto-interacting protein 1	1221325
ch05	50954457	50955086	5.09548e+07	ID=PGSC0003DMG400023494	name=Calcium/calmodulin protein kinase	1.22424e+06
ch05	50956295	50959091	50957693	ID=PGSC0003DMG400023391	name=Ferredoxin-3, chloroplast	1227157
ch05	48501543	48505050	4.85033e+07	ID=PGSC0003DMG400027150	name=Acidic 82 kDa protein	1.22724e+06
ch05	50961356	50962907	5.09621e+07	ID=PGSC0003DMG400023493	name=Acyltransferase	1.2316e+06
ch05	48492654	48497748	48495201	ID=PGSC0003DMG400027149	name=CBL-interacting protein kinase 1	1235335
ch05	50964389	50968088	5.09662e+07	ID=PGSC0003DMG400023390	name=Conserved gene of unknown function	1.2357e+06
ch05	50977044	50979233	5.09781e+07	ID=PGSC0003DMG400023389	name=Protein YIP1	1.2476e+06
ch05	50982683	50987786	5.09852e+07	ID=PGSC0003DMG400023492	name=Copper chaperone	1.2547e+06
ch05	50994089	50995521	50994805	ID=PGSC0003DMG400023491	name=Cationic peroxidase 1	1264269
ch05	48464987	48465638	4.84653e+07	ID=PGSC0003DMG400027226	name=Gene of unknown function	1.26522e+06
ch05	50999727	51008690	5.10042e+07	ID=PGSC0003DMG400023490	name=Pleiotropic drug resistance protein 2	1.27367e+06
ch05	48448980	48453633	4.84513e+07	ID=PGSC0003DMG400027203	name=Pseudouridine synthase	1.27923e+06
ch05	48446704	48447517	4.84471e+07	ID=PGSC0003DMG400027147	name=Conserved gene of unknown function	1.28343e+06
ch05	51014542	51019609	5.10171e+07	ID=PGSC0003DMG400023388	name=Pleiotropic drug resistance protein 2	1.28654e+06
ch05	48437160	48440351	4.84388e+07	ID=PGSC0003DMG400027146	name=Chalcone synthase B	1.29178e+06
ch05	48421814	48423342	48422578	ID=PGSC0003DMG400037381	name=PGmPM3	1307958
ch05	48416600	48418300	48417450	ID=PGSC0003DMG400027202	name=MYB-like DNA-binding domain protein	1313086
ch05	48406345	48413526	4.84099e+07	ID=PGSC0003DMG400027201	name=26S proteasome subunit	1.3206e+06
ch05	51063585	51066225	51064905	ID=PGSC0003DMG400023489	name=RNA binding protein	1334369
ch05	51069263	51071713	51070488	ID=PGSC0003DMG400023386	name=UDP-glucose:glucosyltransferase	1339952
ch05	51069263	51071713	51070488	ID=PGSC0003DMG400023488	name=UDP-glucose:glucosyltransferase	1339952
ch05	51079351	51080983	51080167	ID=PGSC0003DMG400023385	name=UDP-glucose:glucosyltransferase	1349631
ch05	51086055	51090773	51088414	ID=PGSC0003DMG400023384	name=Ribonuclease z, chloroplast	1357878
ch05	51091029	51095751	51093390	ID=PGSC0003DMG400023487	name=Conserved gene of unknown function	1362854
ch05	51097275	51100701	51098988	ID=PGSC0003DMG400023383	name=80A08_4	1368452
ch05	48357655	48358706	4.83582e+07	ID=PGSC0003DMG400027200	name=Family 1 glycosyltransferase	1.37236e+06
ch05	51102810	51107907	5.11054e+07	ID=PGSC0003DMG400023486	name=RING zinc finger protein	1.37482e+06
ch05	48354103	48356072	4.83551e+07	ID=PGSC0003DMG400027144	name=Oligopeptide transporter OPT family	1.37545e+06
ch05	48352508	48352918	48352713	ID=PGSC0003DMG400037272	name=Gene of unknown function	1377823
ch05	51108625	51110931	51109778	ID=PGSC0003DMG400023382	name=Cytochrome P450 77A2	1379242
ch05	48348185	48350916	4.83496e+07	ID=PGSC0003DMG400027199	name=Gene of unknown function	1.38099e+06
ch05	51115845	51120025	51117935	ID=PGSC0003DMG400023381	name=Transferase, transferring glycosyl groups	1387399
ch05	48335777	48345395	48340586	ID=PGSC0003DMG400027143	name=Dihydrolipoyl dehydrogenase	1389950
ch05	51123581	51124793	51124187	ID=PGSC0003DMG400023485	name=Gene of unknown function	1393651
ch05	48329198	48332263	4.83307e+07	ID=PGSC0003DMG400027198	name=GRAS family transcription factor	1.39981e+06
ch05	51131395	51132522	5.1132e+07	ID=PGSC0003DMG400023380	name=Gene of unknown function	1.40142e+06
ch05	48327749	48328323	48328036	ID=PGSC0003DMG400027197	name=DHN10	1402500
ch05	48326024	48326491	4.83263e+07	ID=PGSC0003DMG400027225	name=Conserved gene of unknown function	1.40428e+06
ch05	51134259	51135444	5.11349e+07	ID=PGSC0003DMG400023379	name=Gene of unknown function	1.40432e+06
ch05	48323805	48324282	4.8324e+07	ID=PGSC0003DMG400027224	name=Conserved gene of unknown function	1.40649e+06
ch05	51138400	51139303	5.11389e+07	ID=PGSC0003DMG400023484	name=Gene of unknown function	1.40832e+06
ch05	51138259	51141555	51139907	ID=PGSC0003DMG400023378	name=Gene of unknown function	1409371
ch05	51144173	51150128	5.11472e+07	ID=PGSC0003DMG400023377	name=Transferase, transferring glycosyl groups	1.41661e+06
ch05	48301754	48311941	4.83068e+07	ID=PGSC0003DMG400027142	name=ER glycerol-phosphate acyltransferase	1.42369e+06
ch05	51154982	51155688	51155335	ID=PGSC0003DMG400023483	name=Self-pruning interacting protein 1	1424799
ch05	51157072	51162573	5.11598e+07	ID=PGSC0003DMG400023376	name=Galactose-binding like domain containing protein	1.42929e+06
ch05	48297496	48299146	48298321	ID=PGSC0003DMG400027141	name=Zeamatin	1432215
ch05	51163436	51164074	51163755	ID=PGSC0003DMG400023375	name=Histone H2B	1433219
ch05	48290716	48293184	48291950	ID=PGSC0003DMG400027140	name=Kinase	1438586
ch05	51169698	51177006	51173352	ID=PGSC0003DMG400023482	name=Far upstream element-binding protein	1442816
ch05	51177306	51178496	51177901	ID=PGSC0003DMG400023374	name=Glycine-rich cell wall structural protein 1	1447365
ch05	48282440	48283640	48283040	ID=PGSC0003DMG400027139	name=ESC	1447496
ch05	48276006	48277747	4.82769e+07	ID=PGSC0003DMG400027138	name=Conserved gene of unknown function	1.45366e+06
ch05	51181263	51187357	51184310	ID=PGSC0003DMG402023373	name=Nam 9	1453774
ch05	51185132	51185850	51185491	ID=PGSC0003DMG400023542	name=Gene of unknown function	1454955
ch05	51188038	51192076	51190057	ID=PGSC0003DMG401023373	name=Nam 8	1459521
ch05	48266485	48268406	4.82674e+07	ID=PGSC0003DMG400027196	name=Protein phosphatase 2C	1.46309e+06
ch05	48255413	48261707	48258560	ID=PGSC0003DMG400027137	name=ATP binding protein	1471976
ch05	51208147	51212194	5.12102e+07	ID=PGSC0003DMG402023481	name=Pectate lyase	1.47963e+06
ch05	48247456	48252669	4.82501e+07	ID=PGSC0003DMG400027195	name=Speckle-type POZ protein	1.48047e+06
ch05	51211370	51212194	51211782	ID=PGSC0003DMG401023481	name=Gene of unknown function	1481246
ch05	51213086	51219839	5.12165e+07	ID=PGSC0003DMG400023372	name=Protein phosphatase 2a, regulatory subunit	1.48593e+06
ch05	48237444	48243983	4.82407e+07	ID=PGSC0003DMG400027194	name=Serine/threonine-protein kinase Nek8	1.48982e+06
ch05	51222706	51224454	51223580	ID=PGSC0003DMG400023371	name=Nodulin family protein	1493044
ch05	48231191	48235844	4.82335e+07	ID=PGSC0003DMG400027136	name=UPF0497 membrane protein	1.49702e+06
ch05	51228811	51230323	51229567	ID=PGSC0003DMG400023480	name=Acyltransferase 1	1499031
ch05	51230400	51234471	5.12324e+07	ID=PGSC0003DMG400023370	name=Conserved gene of unknown function	1.5019e+06
ch05	48223183	48230540	4.82269e+07	ID=PGSC0003DMG400027135	name=Protein YIPF1	1.50367e+06
ch05	51236795	51237403	51237099	ID=PGSC0003DMG400044193	name=Conserved gene of unknown function	1506563
ch05	51236774	51238171	5.12375e+07	ID=PGSC0003DMG402023369	name=Conserved gene of unknown function	1.50694e+06
ch05	51238003	51241103	51239553	ID=PGSC0003DMG401023369	name=Gene of unknown function	1509017
ch05	51242071	51243699	51242885	ID=PGSC0003DMG400023479	name=Amine oxidase	1512349
ch05	51246736	51248821	5.12478e+07	ID=PGSC0003DMG402023368	name=Amine oxidase	1.51724e+06
ch05	48208214	48215644	48211929	ID=PGSC0003DMG400027193	name=Folylpolyglutamate synthase	1518607
ch05	51253800	51261247	5.12575e+07	ID=PGSC0003DMG400023478	name=ATVPS33 (Arabidopsis thaliana vacuolar protein sorting 33)	1.52699e+06
ch05	51261350	51266896	51264123	ID=PGSC0003DMG400023367	name=Signal transducer	1533587
ch05	48192235	48199860	4.8196e+07	ID=PGSC0003DMG400027192	name=Zinc ion binding protein	1.53449e+06
ch05	48189416	48191718	48190567	ID=PGSC0003DMG400027134	name=Conserved gene of unknown function	1539969
ch05	48180808	48182363	4.81816e+07	ID=PGSC0003DMG400027191	name=Conserved gene of unknown function	1.54895e+06
ch05	48161239	48164802	4.8163e+07	ID=PGSC0003DMG402027133	name=UDP-glucosyltransferase family 1 protein	1.56752e+06
ch05	48158675	48159461	48159068	ID=PGSC0003DMG402027132	name=Lipase	1571468
ch05	51298639	51305683	51302161	ID=PGSC0003DMG400023477	name=Zinc ion binding protein	1571625
ch05	48152284	48155922	48154103	ID=PGSC0003DMG401027133	name=UDP-glucosyltransferase family 1 protein	1576433
ch05	51305950	51313318	51309634	ID=PGSC0003DMG400023366	name=Quinonprotein alcohol dehydrogenase	1579098
ch05	48147310	48150689	4.8149e+07	ID=PGSC0003DMG401027132	name=Lipase	1.58154e+06
ch05	51319128	51320774	51319951	ID=PGSC0003DMG400023365	name=Flowering locus T protein	1589415
ch05	48135780	48139477	4.81376e+07	ID=PGSC0003DMG400027190	name=R2r3-myb transcription factor	1.59291e+06
ch05	51325271	51326262	5.13258e+07	ID=PGSC0003DMG400023364	name=Conserved gene of unknown function	1.59523e+06
ch05	48134009	48135411	48134710	ID=PGSC0003DMG400027189	name=Tubulin folding cofactor	1595826
ch05	51327967	51331579	51329773	ID=PGSC0003DMG400023363	name=Protein transport protein Sec24C	1599237
ch05	48120384	48121316	48120850	ID=PGSC0003DMG400027223	name=Gene of unknown function	1609686
ch05	51349697	51353587	51351642	ID=PGSC0003DMG400023362	name=Alcohol dehydrogenase	1621106
ch05	51354964	51358461	5.13567e+07	ID=PGSC0003DMG400023476	name=PGPS/NH15	1.62618e+06
ch05	48097039	48104535	48100787	ID=PGSC0003DMG400027188	name=Proline transporter 2	1629749
ch05	51359496	51365523	5.13625e+07	ID=PGSC0003DMG400023361	name=Methylenetetrahydrofolate reductase	1.63197e+06
ch05	48090781	48095798	4.80933e+07	ID=PGSC0003DMG400027187	name=Proline transporter 3	1.63725e+06
ch05	51367318	51369549	5.13684e+07	ID=PGSC0003DMG400023475	name=Tyrosine-protein phosphatase SIW14	1.6379e+06
ch05	51366941	51372352	5.13696e+07	ID=PGSC0003DMG400023360	name=WRKY transcription factor	1.63911e+06
ch05	48084597	48089985	48087291	ID=PGSC0003DMG402027186	name=Ribosomal protein L33	1643245
ch05	51377961	51381331	51379646	ID=PGSC0003DMG400023359	name=Isopentenyl diphosphate isomerase	1649110
ch05	48076641	48081349	48078995	ID=PGSC0003DMG401027186	name=Plastidic phosphate translocator2	1651541
ch05	51385911	51392311	51389111	ID=PGSC0003DMG400023474	name=Translation initiation factor	1658575
ch05	51392829	51396733	51394781	ID=PGSC0003DMG400023358	name=DNA repair protein recA homolog 3, mitochondrial	1664245
ch05	48063382	48068169	4.80658e+07	ID=PGSC0003DMG400027131	name=LIM domain protein WLIM2	1.66476e+06
ch05	51399597	51404357	51401977	ID=PGSC0003DMG400023473	name=Protein phosphatase-2c	1671441
ch05	48057906	48058531	4.80582e+07	ID=PGSC0003DMG400027222	name=Conserved gene of unknown function	1.67232e+06
ch05	48052466	48057779	4.80551e+07	ID=PGSC0003DMG400027130	name=Phosphoinositide-specific phospholipase C	1.67541e+06
ch05	51404950	51412381	5.14087e+07	ID=PGSC0003DMG400023357	name=Aspartic proteinase Asp1	1.67813e+06
ch05	51412631	51417275	51414953	ID=PGSC0003DMG400023472	name=HAD-superfamily hydrolase, subfamily IA, variant 3	1684417
ch05	51418059	51418661	51418360	ID=PGSC0003DMG400041411	name=Type I MADS box transcription factor	1687824
ch05	51419391	51426291	51422841	ID=PGSC0003DMG400023471	name=Conserved gene of unknown function	1692305
ch05	51430374	51430974	51430674	ID=PGSC0003DMG400023470	name=Conserved gene of unknown function	1700138
ch05	48026479	48029383	48027931	ID=PGSC0003DMG400027185	name=Hydrolase	1702605
ch05	51433825	51436666	5.14352e+07	ID=PGSC0003DMG400023356	name=UDP-glucose:glucosyltransferase	1.70471e+06
ch05	51441119	51444181	51442650	ID=PGSC0003DMG400023469	name=Conserved gene of unknown function	1712114
ch05	51444448	51448897	5.14467e+07	ID=PGSC0003DMG400023355	name=Receptor serine-threonine protein kinase	1.71614e+06
ch05	51450527	51454048	5.14523e+07	ID=PGSC0003DMG400023354	name=F-box family protein	1.72175e+06
ch05	48003198	48004516	48003857	ID=PGSC0003DMG400035710	name=Gibberellin 3beta-hydroxylase3	1726679
ch05	51455370	51461486	51458428	ID=PGSC0003DMG400023353	name=MAR-binding protein	1727892
ch05	51461969	51465122	5.14635e+07	ID=PGSC0003DMG402023468	name=DNA-directed RNA polymerase III	1.73301e+06
ch05	51464301	51465122	5.14647e+07	ID=PGSC0003DMG401023468	name=Gene of unknown function	1.73418e+06
ch05	47993866	47996977	4.79954e+07	ID=PGSC0003DMG401027184	name=ATP binding protein	1.73511e+06
ch05	47990937	47991767	47991352	ID=PGSC0003DMG402027184	name=ATP binding protein	1739184
ch05	47988996	47989895	4.79894e+07	ID=PGSC0003DMG400027183	name=AtPH1	1.74109e+06
ch05	47985220	47986868	47986044	ID=PGSC0003DMG400027129	name=Plastid-specific ribosomal protein 4	1744492
ch05	51476061	51479312	5.14777e+07	ID=PGSC0003DMG400023352	name=Conserved gene of unknown function	1.74715e+06
ch05	47980608	47984023	4.79823e+07	ID=PGSC0003DMG400027128	name=Binding protein	1.74822e+06
ch05	47973466	47977662	47975564	ID=PGSC0003DMG400027182	name=Eukaryotic translation initiation factor 3f, eif3f	1754972
ch05	47968755	47970270	4.79695e+07	ID=PGSC0003DMG400027181	name=Transferase family protein	1.76102e+06
ch05	51488807	51494659	51491733	ID=PGSC0003DMG400023467	name=DNA binding protein	1761197
ch05	51494921	51495580	5.14953e+07	ID=PGSC0003DMG400023350	name=Conserved gene of unknown function	1.76471e+06
ch05	51495985	51497825	51496905	ID=PGSC0003DMG400023349	name=Conserved gene of unknown function	1766369
ch05	51498770	51499316	51499043	ID=PGSC0003DMG400023348	name=Conserved gene of unknown function	1768507
ch05	47959545	47961267	47960406	ID=PGSC0003DMG400027180	name=Anthocyanin 5-aromatic acyltransferase	1770130
ch05	51500063	51507397	51503730	ID=PGSC0003DMG400023347	name=Protein phosphatase 2C 38	1773194
ch05	47952893	47954582	4.79537e+07	ID=PGSC0003DMG400027127	name=Anthocyanin 5-aromatic acyltransferase	1.7768e+06
ch05	51511521	51515352	5.15134e+07	ID=PGSC0003DMG400023466	name=Plasma membrane intrinsic protein	1.7829e+06
ch05	51516702	51518689	5.15177e+07	ID=PGSC0003DMG400023465	name=Phospholipase	1.78716e+06
ch05	51518931	51524033	51521482	ID=PGSC0003DMG400023346	name=Serine/threonine-protein phosphatase	1790946
ch05	47933820	47943234	47938527	ID=PGSC0003DMG400027179	name=36kDa-peroxisomal membrane protein (PMP36)	1792009
ch05	51525097	51532402	5.15287e+07	ID=PGSC0003DMG400023464	name=V-type proton ATPase subunit G 2	1.79821e+06
ch05	47924762	47930334	47927548	ID=PGSC0003DMG400027178	name=Conserved gene of unknown function	1802988
ch05	51537051	51546237	51541644	ID=PGSC0003DMG400023463	name=Patatin T5	1811108
ch05	51546842	51552882	51549862	ID=PGSC0003DMG400023345	name=ARF domain class transcription factor	1819326
ch05	51555238	51556118	51555678	ID=PGSC0003DMG400023541	name=RNase H family protein	1825142
ch05	47894690	47896854	47895772	ID=PGSC0003DMG400027126	name=DIV2B protein	1834764
ch05	47883736	47886923	4.78853e+07	ID=PGSC0003DMG400027125	name=Chloroplast sedoheptulose-1,7-bisphosphatase	1.84521e+06
ch05	51580476	51583002	51581739	ID=PGSC0003DMG400023344	name=Chlorophyll a-b binding protein 6A, chloroplastic	1851203
ch05	47874434	47877237	4.78758e+07	ID=PGSC0003DMG400027124	name=Serine/threonine-protein kinase CCR3	1.8547e+06
ch05	51584853	51592176	5.15885e+07	ID=PGSC0003DMG400023462	name=Ubiquitin	1.85798e+06
ch05	47864185	47870369	47867277	ID=PGSC0003DMG400027123	name=NLI interacting factor family protein	1863259
ch05	51592739	51595108	5.15939e+07	ID=PGSC0003DMG400023461	name=Chlorophyll a-b binding protein 6A, chloroplastic	1.86339e+06
ch05	51593223	51595954	5.15946e+07	ID=PGSC0003DMG400023343	name=Conserved gene of unknown function	1.86405e+06
ch05	51598595	51601947	51600271	ID=PGSC0003DMG400023460	name=Conserved gene of unknown function	1869735
ch05	51605412	51612140	51608776	ID=PGSC0003DMG400023459	name=DsRNA-binding protein 2	1878240
ch05	47848068	47851043	4.78496e+07	ID=PGSC0003DMG400027176	name=Transcription factor	1.88098e+06
ch05	47834275	47835826	4.78351e+07	ID=PGSC0003DMG402027175	name=Conserved gene of unknown function	1.89549e+06
ch05	47827015	47831190	4.78291e+07	ID=PGSC0003DMG401027175	name=Cellulase homolog	1.90143e+06
ch05	47824972	47826161	4.78256e+07	ID=PGSC0003DMG400041241	name=EMB-1 protein	1.90497e+06
ch05	51640830	51645703	5.16433e+07	ID=PGSC0003DMG400023341	name=AG-motif binding protein-1	1.91273e+06
ch05	47813102	47815574	47814338	ID=PGSC0003DMG400027174	name=Protein phosphatase 2c	1916198
ch05	51654343	51661890	5.16581e+07	ID=PGSC0003DMG400023340	name=Ribophorin	1.92758e+06
ch05	51663230	51669114	51666172	ID=PGSC0003DMG400023339	name=Conserved gene of unknown function	1935636
ch05	47783431	47784171	47783801	ID=PGSC0003DMG400027122	name=Pollen ole e 1 allergen and extensin family protein	1946735
ch05	47776267	47781982	4.77791e+07	ID=PGSC0003DMG400027121	name=ATP binding protein	1.95141e+06
ch05	51678579	51685384	5.1682e+07	ID=PGSC0003DMG400023338	name=1-(5-phosphoribosyl)-5-[(5-phosphoribosylamino)methylideneamino] imidazole-4-carboxamide isomerase, chloroplastic	1.95145e+06
ch05	51686684	51690963	5.16888e+07	ID=PGSC0003DMG400023337	name=Proteasome subunit beta type-5	1.95829e+06
ch05	47761518	47768187	4.77649e+07	ID=PGSC0003DMG402027172	name=Adenosine diphosphatase	1.96568e+06
ch05	51694756	51698709	5.16967e+07	ID=PGSC0003DMG400023458	name=Phenylalanine ammonia-lyase	1.9662e+06
ch05	47761518	47762593	4.77621e+07	ID=PGSC0003DMG401027172	name=Adenosine diphosphatase	1.96848e+06
ch05	51702259	51703974	5.17031e+07	ID=PGSC0003DMG400023457	name=Protein kinase APK1A, chloroplast	1.97258e+06
ch05	47752726	47761321	4.7757e+07	ID=PGSC0003DMG400027120	name=Multiple inositol polyphosphate phosphatase 1	1.97351e+06
ch05	51704239	51712232	5.17082e+07	ID=PGSC0003DMG402023336	name=MT-A70 family protein	1.9777e+06
ch05	47747602	47751071	4.77493e+07	ID=PGSC0003DMG400027119	name=Ferritin	1.9812e+06
ch05	51712971	51721333	51717152	ID=PGSC0003DMG401023336	name=MT-A70 family protein	1986616
ch05	47732145	47744473	47738309	ID=PGSC0003DMG400027171	name=Conserved gene of unknown function	1992227
ch05	51721999	51727748	5.17249e+07	ID=PGSC0003DMG400023335	name=Calreticulin	1.99434e+06
ch05	51731427	51734319	51732873	ID=PGSC0003DMG400023456	name=Acyl carrier protein	2002337
ch05	47726189	47726643	47726416	ID=PGSC0003DMG400027219	name=Conserved gene of unknown function	2004120
ch05	51742836	51749910	51746373	ID=PGSC0003DMG400023334	name=Phenylalanyl-tRNA synthetase	2015837
ch05	47710525	47711337	47710931	ID=PGSC0003DMG400027118	name=Abscisic acid receptor PYL4	2019605
ch05	51750943	51758443	51754693	ID=PGSC0003DMG400023455	name=Isocitrate lyase and phosphorylmutase	2024157
ch05	51758840	51767967	5.17634e+07	ID=PGSC0003DMG402023454	name=ATP binding protein	2.03287e+06
ch05	47694466	47697302	47695884	ID=PGSC0003DMG400027117	name=AP2-domain DNA-binding protein	2034652
ch05	51768551	51774730	5.17716e+07	ID=PGSC0003DMG401023454	name=Biotin carboxylase carrier protein	2.0411e+06
ch05	51774940	51776231	5.17756e+07	ID=PGSC0003DMG400023333	name=Thioredoxin F1, chloroplastic	2.04505e+06
ch05	47683220	47685570	47684395	ID=PGSC0003DMG402027116	name=Laccase 90d	2046141
ch05	51779078	51787386	51783232	ID=PGSC0003DMG400023453	name=Chaperonin containing t-complex protein 1, gamma subunit, tcpg	2052696
ch05	47671015	47673987	47672501	ID=PGSC0003DMG401027116	name=Laccase 90c	2058035
ch05	51789905	51795653	51792779	ID=PGSC0003DMG400023332	name=ATP binding protein	2062243
ch05	47664016	47667035	4.76655e+07	ID=PGSC0003DMG400027115	name=Leucine Rich Repeat family protein	2.06501e+06
ch05	47651728	47654219	4.7653e+07	ID=PGSC0003DMG400027168	name=Laccase 90a	2.07756e+06
ch05	47646915	47648581	47647748	ID=PGSC0003DMG400041985	name=Conserved gene of unknown function	2082788
ch05	51820939	51822300	5.18216e+07	ID=PGSC0003DMG400023330	name=Conserved gene of unknown function	2.09108e+06
ch05	51826500	51832519	5.18295e+07	ID=PGSC0003DMG400023451	name=Cleft lip and palate transmembrane protein	2.09897e+06
ch05	51836453	51839062	5.18378e+07	ID=PGSC0003DMG400023450	name=Protein terminal ear1 homolog	2.10722e+06
ch05	51839691	51844680	5.18422e+07	ID=PGSC0003DMG400023329	name=Plasma membrane receptor-like kinase	2.11165e+06
ch05	51850129	51851262	5.18507e+07	ID=PGSC0003DMG400023328	name=Ulp1 protease family, C-terminal catalytic domain containing protein	2.12016e+06
ch05	51853067	51854104	5.18536e+07	ID=PGSC0003DMG400023449	name=Pentatricopeptide repeat-containing protein	2.12305e+06
ch05	51855062	51856025	5.18555e+07	ID=PGSC0003DMG400023540	name=Conserved gene of unknown function	2.12501e+06
ch05	51856785	51858427	51857606	ID=PGSC0003DMG402023448	name=10kDa chaperonin (CPN10) protein	2127070
ch05	51861550	51863797	5.18627e+07	ID=PGSC0003DMG401023448	name=Protein disulfide isomerase	2.13214e+06
ch05	51864988	51865842	51865415	ID=PGSC0003DMG400023327	name=ESTs AU057825(S21823)	2134879
ch05	51867995	51874525	51871260	ID=PGSC0003DMG400023326	name=ATDGK2	2140724
ch05	47584112	47584804	47584458	ID=PGSC0003DMG400011638	name=Beta-expansin	2146078
ch05	51878616	51879636	51879126	ID=PGSC0003DMG400023538	name=SAUR family protein	2148590
ch05	51877092	51883642	51880367	ID=PGSC0003DMG400023325	name=SAUR family protein	2149831
ch05	47574278	47578190	47576234	ID=PGSC0003DMG400011649	name=Monovalent cation:proton antiporter	2154302
ch05	51888392	51890420	51889406	ID=PGSC0003DMG400023324	name=Aspartic proteinase nepenthesin-1	2158870
ch05	47567094	47573430	47570262	ID=PGSC0003DMG400011650	name=Alpha-soluble NSF attachment protein	2160274
ch05	51892280	51895669	5.1894e+07	ID=PGSC0003DMG400023323	name=Arginine/serine-rich coiled coil protein	2.16344e+06
ch05	51897601	51899687	51898644	ID=PGSC0003DMG400023322	name=White-brown-complex ABC transporter family	2168108
ch05	47556832	47559928	47558380	ID=PGSC0003DMG400011639	name=Amino acid transporter	2172156
ch05	47556021	47557264	4.75566e+07	ID=PGSC0003DMG400047169	name=BTB/POZ domain containing protein	2.17389e+06
ch05	51905535	51906371	51905953	ID=PGSC0003DMG400023447	name=NAC domain protein	2175417
ch05	51908487	51912633	51910560	ID=PGSC0003DMG402023446	name=Branched-chain alpha keto-acid dehydrogenase E1 alpha subunit	2180024
ch05	51911710	51912633	5.19122e+07	ID=PGSC0003DMG401023446	name=2-oxoisovalerate dehydrogenase	2.18164e+06
ch05	47544399	47549539	47546969	ID=PGSC0003DMG400036044	name=ATP binding protein	2183567
ch05	51913110	51919135	5.19161e+07	ID=PGSC0003DMG400023321	name=SAL1 phosphatase	2.18559e+06
ch05	51923658	51925755	5.19247e+07	ID=PGSC0003DMG400023445	name=Spotted leaf protein	2.19417e+06
ch05	47534530	47537782	47536156	ID=PGSC0003DMG400011640	name=Peroxidase	2194380
ch05	47532125	47533612	4.75329e+07	ID=PGSC0003DMG400011651	name=Conserved gene of unknown function	2.19767e+06
ch05	47506266	47510051	4.75082e+07	ID=PGSC0003DMG400011641	name=CBL-interacting protein kinase 13	2.22238e+06
ch05	47503023	47505479	47504251	ID=PGSC0003DMG400011652	name=Extensin	2226285
ch05	47486969	47493692	4.74903e+07	ID=PGSC0003DMG400011653	name=Protein LRP16	2.24021e+06
ch05	51967262	51976469	5.19719e+07	ID=PGSC0003DMG400023442	name=DDT domain-containing protein	2.24133e+06
ch05	47483572	47486093	4.74848e+07	ID=PGSC0003DMG400011654	name=Expansin	2.2457e+06
ch05	51976733	51982891	51979812	ID=PGSC0003DMG400023319	name=Alcohol dehydrogenase	2249276
ch05	47476992	47479689	4.74783e+07	ID=PGSC0003DMG400011655	name=Chalcone isomerase	2.2522e+06
ch05	47473571	47474464	4.7474e+07	ID=PGSC0003DMG400011642	name=Sorghum bicolor protein targeted either to mitochondria or chloroplast proteins T50848	2.25652e+06
ch05	51985882	51989780	51987831	ID=PGSC0003DMG400023441	name=Osmotic stress-activated protein kinase	2257295
ch05	47472553	47473122	4.74728e+07	ID=PGSC0003DMG401011656	name=Conserved gene of unknown function	2.2577e+06
ch05	51987196	51992579	5.19899e+07	ID=PGSC0003DMG400023318	name=Conserved gene of unknown function	2.25935e+06
ch05	47464377	47473114	4.74687e+07	ID=PGSC0003DMG402011656	name=U-box domain-containing protein 62	2.26179e+06
ch05	51993855	51999661	51996758	ID=PGSC0003DMG400023440	name=Calcium dependent protein kinase	2266222
ch05	47457816	47460902	47459359	ID=PGSC0003DMG400011643	name=Conserved gene of unknown function	2271177
ch05	52000505	52006307	52003406	ID=PGSC0003DMG400023317	name=ATP binding protein	2272870
ch05	47451265	47455452	4.74534e+07	ID=PGSC0003DMG400011657	name=ATP binding protein	2.27718e+06
ch05	47432375	47434899	47433637	ID=PGSC0003DMG400011644	name=Elongation factor	2296899
ch05	52039916	52040326	52040121	ID=PGSC0003DMG400023316	name=Conserved gene of unknown function	2309585
ch05	47404903	47407616	4.74063e+07	ID=PGSC0003DMG400011645	name=RNA binding protein	2.32428e+06
ch05	47401638	47404668	47403153	ID=PGSC0003DMG400011658	name=Conserved gene of unknown function	2327383
ch05	47396140	47400617	4.73984e+07	ID=PGSC0003DMG400011646	name=GTP-binding	2.33216e+06
ch05	47386591	47395559	47391075	ID=PGSC0003DMG401011647	name=ATP synthase subunit delta', mitochondrial	2339461
ch05	47386886	47391634	47389260	ID=PGSC0003DMG402011647	name=ATP synthase subunit delta', mitochondrial	2341276
ch05	47383253	47386176	4.73847e+07	ID=PGSC0003DMG400011659	name=Caspase	2.34582e+06
ch05	47373127	47376992	4.73751e+07	ID=PGSC0003DMG400011660	name=Pectinesterase	2.35548e+06
ch05	47367668	47372693	4.73702e+07	ID=PGSC0003DMG400011648	name=Pectinesterase	2.36036e+06
ch05	47363278	47363586	47363432	ID=PGSC0003DMG400016005	name=Gene of unknown function	2367104
ch05	47348117	47353993	47351055	ID=PGSC0003DMG400016001	name=Glutamate dehydrogenase A	2379481
ch05	47344346	47345022	47344684	ID=PGSC0003DMG400016007	name=ATP binding protein	2385852
ch05	47337369	47340997	47339183	ID=PGSC0003DMG400016002	name=Small GTP-binding protein	2391353
ch05	47333936	47334853	4.73344e+07	ID=PGSC0003DMG400047109	name=Zinc finger CCCH domain-containing protein 54	2.39614e+06
ch05	47324479	47325451	47324965	ID=PGSC0003DMG400016006	name=Pti4	2405571
ch05	47308711	47310174	4.73094e+07	ID=PGSC0003DMG400016003	name=Ethylene responsive element binding protein C2	2.42109e+06
ch05	47293160	47294004	47293582	ID=PGSC0003DMG400016004	name=Ethylene response factor 4	2436954
ch05	47186758	47188366	47187562	ID=PGSC0003DMG400021824	name=F-box protein	2542974
ch05	47182837	47184882	4.71839e+07	ID=PGSC0003DMG400021817	name=Annexin P38	2.54668e+06
ch05	47178579	47182440	4.71805e+07	ID=PGSC0003DMG400021825	name=Conserved gene of unknown function	2.55003e+06
ch05	47170466	47176562	47173514	ID=PGSC0003DMG400021826	name=Carbohydrate transporter	2557022
ch05	47164182	47166170	47165176	ID=PGSC0003DMG400021827	name=Carbohydrate transporter	2565360
ch05	47161080	47163659	4.71624e+07	ID=PGSC0003DMG400021828	name=Carbohydrate transporter	2.56817e+06
ch05	47149239	47151842	4.71505e+07	ID=PGSC0003DMG400021829	name=Carbohydrate transporter	2.58e+06
ch05	47144714	47147929	4.71463e+07	ID=PGSC0003DMG400021818	name=Carbohydrate transporter	2.58421e+06
ch05	47141998	47143194	47142596	ID=PGSC0003DMG400021819	name=Hydroxyproline-rich glycoprotein family protein	2587940
ch05	47129773	47133403	47131588	ID=PGSC0003DMG400021820	name=Trehalose-6-phosphate synthase	2598948
ch05	47126545	47127006	4.71268e+07	ID=PGSC0003DMG400041302	name=Transcription factor	2.60376e+06
ch05	47120890	47123365	4.71221e+07	ID=PGSC0003DMG400021830	name=Allergen BRSn20	2.60841e+06
ch05	47100364	47101923	4.71011e+07	ID=PGSC0003DMG400021821	name=Conserved gene of unknown function	2.62939e+06
ch05	47095027	47099299	47097163	ID=PGSC0003DMG400021831	name=Inositol-3-phosphate synthase	2633373
ch05	47081053	47081749	47081401	ID=PGSC0003DMG400021836	name=Chaperone protein DNAj	2649135
ch05	47068102	47069570	47068836	ID=PGSC0003DMG400021832	name=D-alanyl-d-alanine carboxypeptidase	2661700
ch05	47061347	47066451	47063899	ID=PGSC0003DMG400021822	name=Multidrug resistance protein 1, 2	2666637
ch05	47049115	47050456	4.70498e+07	ID=PGSC0003DMG400021834	name=Metal ion binding protein	2.68075e+06
ch05	47034824	47037804	47036314	ID=PGSC0003DMG400021823	name=Gene of unknown function	2694222
ch05	47006734	47007080	47006907	ID=PGSC0003DMG400021837	name=Gene of unknown function	2723629
ch05	47001123	47001679	47001401	ID=PGSC0003DMG400021838	name=Gene of unknown function	2729135
ch05	46933501	46933905	46933703	ID=PGSC0003DMG400030102	name=Conserved gene of unknown function	2796833
ch05	46926825	46930868	4.69288e+07	ID=PGSC0003DMG400030103	name=Conserved gene of unknown function	2.80169e+06
ch05	46898863	46903480	4.69012e+07	ID=PGSC0003DMG400030104	name=DNA-directed RNA polymerase II	2.82936e+06
ch05	46888513	46893536	4.6891e+07	ID=PGSC0003DMG400030097	name=Gamma-glutamyl transferase	2.83951e+06
ch05	46876433	46881888	4.68792e+07	ID=PGSC0003DMG400030098	name=Conserved gene of unknown function	2.85138e+06
ch05	46872704	46874371	4.68735e+07	ID=PGSC0003DMG401030099	name=Conserved gene of unknown function	2.857e+06
ch05	46864317	46869037	46866677	ID=PGSC0003DMG402030099	name=Prosystemin	2863859
ch05	46855677	46856399	46856038	ID=PGSC0003DMG400030105	name=Glutaredoxin	2874498
ch05	46849024	46849542	46849283	ID=PGSC0003DMG400030106	name=Glutaredoxin	2881253
ch05	46841669	46844132	4.68429e+07	ID=PGSC0003DMG400030107	name=Conserved gene of unknown function	2.88764e+06
ch05	46835720	46841112	46838416	ID=PGSC0003DMG400030100	name=Iron-sulfur assembly protein IscA, chloroplast	2892120
ch05	46825333	46833053	46829193	ID=PGSC0003DMG400030101	name=DUF614 containing protein	2901343
ch05	46817361	46818666	4.6818e+07	ID=PGSC0003DMG401030108	name=Gene of unknown function	2.91252e+06
ch05	46809324	46811750	46810537	ID=PGSC0003DMG403030108	name=Structural maintenance of chromosomes 6 smc6	2919999
ch05	46785581	46786673	46786127	ID=PGSC0003DMG404030108	name=CXE carboxylesterase	2944409
ch05	46782183	46782881	46782532	ID=PGSC0003DMG400046174	name=Ulp1 protease family, C-terminal catalytic domain containing protein	2948004
ch05	46769608	46770688	46770148	ID=PGSC0003DMG400007215	name=CXE carboxylesterase	2960388
ch05	46765821	46767215	46766518	ID=PGSC0003DMG400007233	name=CXE carboxylesterase	2964018
ch05	46743297	46747329	46745313	ID=PGSC0003DMG400007216	name=Conserved gene of unknown function	2985223
ch05	46737078	46743143	4.67401e+07	ID=PGSC0003DMG400007234	name=Leucine-rich repeat receptor kinase	2.99043e+06
ch05	46720300	46722707	4.67215e+07	ID=PGSC0003DMG402007235	name=Nuclear division RFT1	3.00903e+06
ch05	46717068	46720018	46718543	ID=PGSC0003DMG401007235	name=Oligosaccharide translocation protein rft1	3011993
ch05	46700250	46705124	46702687	ID=PGSC0003DMG400007236	name=DNA binding protein	3027849
ch05	46689371	46694504	4.66919e+07	ID=PGSC0003DMG400007237	name=Zinc finger protein	3.0386e+06
ch05	46678838	46682654	46680746	ID=PGSC0003DMG400007238	name=Gene of unknown function	3049790
ch05	46660227	46664227	46662227	ID=PGSC0003DMG400007217	name=Kinase family protein	3068309
ch05	46658289	46659272	4.66588e+07	ID=PGSC0003DMG400040438	name=F-box protein	3.07176e+06
ch05	46656144	46657590	46656867	ID=PGSC0003DMG400007218	name=F-box family protein	3073669
ch05	46651341	46653342	4.66523e+07	ID=PGSC0003DMG400007219	name=NB-ARC domain containing protein	3.07819e+06
ch05	46632967	46635366	4.66342e+07	ID=PGSC0003DMG400007220	name=Gene of unknown function	3.09637e+06
ch05	46611076	46613057	4.66121e+07	ID=PGSC0003DMG400007248	name=Gene of unknown function	3.11847e+06
ch05	46606301	46606750	4.66065e+07	ID=PGSC0003DMG400037638	name=Gene of unknown function	3.12401e+06
ch05	46591799	46592813	46592306	ID=PGSC0003DMG400007221	name=F-box protein	3138230
ch05	46583390	46590258	46586824	ID=PGSC0003DMG400007222	name=UDP-N-acetylglucosamine transporter	3143712
ch05	46577401	46582898	4.65801e+07	ID=PGSC0003DMG400007239	name=Root phototropism protein	3.15039e+06
ch05	46571643	46573508	4.65726e+07	ID=PGSC0003DMG400007249	name=Gene of unknown function	3.15796e+06
ch05	46561954	46563752	46562853	ID=PGSC0003DMG400007250	name=Gene of unknown function	3167683
ch05	46560188	46561666	46560927	ID=PGSC0003DMG400007251	name=Gene of unknown function	3169609
ch05	46552959	46557157	46555058	ID=PGSC0003DMG400007223	name=GTP-binding protein	3175478
ch05	46493480	46498741	4.64961e+07	ID=PGSC0003DMG400016806	name=Mitochondrial substrate carrier family protein	3.23443e+06
ch05	46491441	46492847	46492144	ID=PGSC0003DMG400016801	name=Amino acid transporter	3238392
ch05	46486981	46487667	46487324	ID=PGSC0003DMG400016800	name=R2r3-myb transcription factor	3243212
ch05	46472688	46473932	46473310	ID=PGSC0003DMG400016799	name=EPIDERMAL PATTERNING FACTOR 1	3257226
ch05	46456883	46457763	46457323	ID=PGSC0003DMG400016805	name=F-box protein	3273213
ch05	46448860	46456539	4.64527e+07	ID=PGSC0003DMG400016798	name=Poly-A binding protein	3.27784e+06
ch05	46442609	46446926	4.64448e+07	ID=PGSC0003DMG400016797	name=ATP-binding cassette transporter	3.28577e+06
ch05	46407258	46411273	4.64093e+07	ID=PGSC0003DMG400046668	name=Gene of unknown function	3.32127e+06
ch05	46396478	46397232	46396855	ID=PGSC0003DMG400044743	name=Gene of unknown function	3333681
ch05	46362664	46364311	4.63635e+07	ID=PGSC0003DMG400016803	name=PHB1	3.36705e+06
ch05	46360028	46362413	4.63612e+07	ID=PGSC0003DMG400016795	name=ADP-ribosylation factor	3.36932e+06
ch05	46354698	46357474	46356086	ID=PGSC0003DMG400016794	name=ATP binding protein	3374450
ch05	46351844	46353734	46352789	ID=PGSC0003DMG400016793	name=Histone H3.3	3377747
ch05	46325739	46330374	4.63281e+07	ID=PGSC0003DMG400016802	name=LMBR1 integral membrane protein	3.40248e+06
ch05	46323109	46323731	46323420	ID=PGSC0003DMG400016792	name=Avr9/Cf-9 rapidly elicited protein 75	3407116
ch05	46313484	46314069	4.63138e+07	ID=PGSC0003DMG400016791	name=Avr9/Cf-9 rapidly elicited protein 75	3.41676e+06
ch05	46286548	46289427	4.6288e+07	ID=PGSC0003DMG400016790	name=Homeodomain-leucine zipper protein 56	3.44255e+06
ch05	46259639	46260467	46260053	ID=PGSC0003DMG400034902	name=Conserved gene of unknown function	3470483
ch05	46255462	46256414	46255938	ID=PGSC0003DMG400016789	name=Conserved gene of unknown function	3474598
ch05	46186916	46193174	46190045	ID=PGSC0003DMG400014582	name=Conserved gene of unknown function	3540491
ch05	46181273	46182230	4.61818e+07	ID=PGSC0003DMG400034490	name=Zinc finger homeodomain protein 1	3.54878e+06
ch05	46170847	46173642	4.61722e+07	ID=PGSC0003DMG400014583	name=Conserved gene of unknown function	3.55829e+06
ch05	46167983	46169284	4.61686e+07	ID=PGSC0003DMG400039571	name=Conserved gene of unknown function	3.5619e+06
ch05	46134898	46136536	46135717	ID=PGSC0003DMG400045576	name=ZF-HD protein dimerisation region containing protein	3594819
ch05	46111587	46114431	46113009	ID=PGSC0003DMG400014595	name=Cyclin D2.1 protein	3617527
ch05	46080509	46081108	4.60808e+07	ID=PGSC0003DMG400043298	name=Gene of unknown function	3.64973e+06
ch05	46065809	46069675	46067742	ID=PGSC0003DMG400014596	name=Gene of unknown function	3662794
ch05	46063213	46064522	4.60639e+07	ID=PGSC0003DMG400014597	name=Mitochondrial dicarboxylate carrier protein	3.66667e+06
ch05	46050230	46053131	4.60517e+07	ID=PGSC0003DMG400014585	name=Restin	3.67886e+06
ch05	46042602	46050131	4.60464e+07	ID=PGSC0003DMG400014598	name=AP2 domain-containing transcription factor	3.68417e+06
ch05	46013104	46021688	46017396	ID=PGSC0003DMG400014586	name=Conserved gene of unknown function	3713140
ch05	46013129	46014544	4.60138e+07	ID=PGSC0003DMG400038217	name=UDP-rhamnose:rhamnosyltransferase	3.7167e+06
ch05	46003037	46011561	46007299	ID=PGSC0003DMG400014600	name=Lyase	3723237
ch05	45997453	45999526	4.59985e+07	ID=PGSC0003DMG402014601	name=Conserved gene of unknown function	3.73205e+06
ch05	45995340	46000303	4.59978e+07	ID=PGSC0003DMG401014601	name=Pentatricopeptide repeat-containing protein	3.73271e+06
ch05	45991547	45992587	45992067	ID=PGSC0003DMG400046446	name=Transcription regulator	3738469
ch05	45988489	45988986	4.59887e+07	ID=PGSC0003DMG400014613	name=PERLD1	3.7418e+06
ch05	45980858	45982948	45981903	ID=PGSC0003DMG400014587	name=Conserved gene of unknown function	3748633
ch05	45976142	45976899	4.59765e+07	ID=PGSC0003DMG400014588	name=Gene of unknown function	3.75402e+06
ch05	45975481	45976085	45975783	ID=PGSC0003DMG400014602	name=Gene of unknown function	3754753
ch05	45973049	45974840	4.59739e+07	ID=PGSC0003DMG400014589	name=Calmodulin binding protein	3.75659e+06
ch05	45964861	45966003	45965432	ID=PGSC0003DMG400014603	name=Gene of unknown function	3765104
ch05	45950200	45951805	4.5951e+07	ID=PGSC0003DMG400014590	name=High mobility group protein	3.77953e+06
ch05	45939849	45946346	4.59431e+07	ID=PGSC0003DMG400014604	name=Calmodulin-binding heat-shock protein	3.78744e+06
ch05	45928179	45930716	4.59294e+07	ID=PGSC0003DMG401014605	name=EIX receptor 1	3.80109e+06
ch05	45918770	45920691	4.59197e+07	ID=PGSC0003DMG402014605	name=DUF26 domain-containing protein 1	3.81081e+06
ch05	45913654	45918179	4.59159e+07	ID=PGSC0003DMG400014606	name=Endo-1,4-beta-xylanase C	3.81462e+06
ch05	45909974	45911392	45910683	ID=PGSC0003DMG400014591	name=Gene of unknown function	3819853
ch05	45890118	45894153	4.58921e+07	ID=PGSC0003DMG400014592	name=Glutamine synthetase	3.8384e+06
ch05	45880235	45881822	4.5881e+07	ID=PGSC0003DMG400014607	name=Aspartyl protease family protein	3.84951e+06
ch05	45866257	45867791	45867024	ID=PGSC0003DMG402014608	name=Elicitor-inducible LRR receptor EILP	3863512
ch05	45857789	45867791	45862790	ID=PGSC0003DMG401014608	name=ThiF family protein	3867746
ch05	45835441	45837564	4.58365e+07	ID=PGSC0003DMG400014609	name=ATRAD3	3.89403e+06
ch05	45818070	45819013	4.58185e+07	ID=PGSC0003DMG400014594	name=Ethylene response factor	3.91199e+06
ch05	45799148	45800245	4.57997e+07	ID=PGSC0003DMG400014610	name=ERF transcription factor 5	3.93084e+06
ch05	45730559	45732112	4.57313e+07	ID=PGSC0003DMG400041788	name=Lysine-specific histone demethylase 1 homolog 3	3.9992e+06
ch05	45715109	45716525	45715817	ID=PGSC0003DMG400043955	name=Conserved gene of unknown function	4014719
ch05	45694713	45698106	4.56964e+07	ID=PGSC0003DMG400043206	name=Conserved gene of unknown function	4.03413e+06
ch05	45692715	45693353	45693034	ID=PGSC0003DMG400006986	name=NAD(P)H-quinone oxidoreductase subunit K, chloroplastic	4037502
ch05	45678770	45679363	4.56791e+07	ID=PGSC0003DMG400039569	name=Conserved gene of unknown function	4.05147e+06
ch05	45667733	45676099	45671916	ID=PGSC0003DMG400006987	name=Pre-mRNA-splicing factor isy-1	4058620
ch05	45630640	45637267	4.5634e+07	ID=PGSC0003DMG400006988	name=KANADI like transcription factor	4.09658e+06
ch05	45596959	45601040	4.5599e+07	ID=PGSC0003DMG400006989	name=Shaggy-like kinase 59	4.13154e+06
ch05	45589593	45595665	45592629	ID=PGSC0003DMG400006990	name=Cleavage and polyadenylation specificity factor	4137907
ch05	45581656	45587896	45584776	ID=PGSC0003DMG400007015	name=Cornichon family protein	4145760
ch05	45576555	45580152	4.55784e+07	ID=PGSC0003DMG400007016	name=Cinnamoyl-CoA reductase	4.15218e+06
ch05	45564869	45568866	4.55669e+07	ID=PGSC0003DMG400006991	name=Cytoplasmic ribosomal protein S13	4.16367e+06
ch05	45560667	45562880	4.55618e+07	ID=PGSC0003DMG400007017	name=UDP-glucuronate 4-epimerase 3	4.16876e+06
ch05	45549427	45557150	4.55533e+07	ID=PGSC0003DMG400007018	name=3-phosphoshikimate 1-carboxyvinyltransferase, chloroplastic	4.17725e+06
ch05	45542432	45546742	45544587	ID=PGSC0003DMG400007019	name=Transketolase 1	4185949
ch05	45532269	45537484	4.55349e+07	ID=PGSC0003DMG400007020	name=DNA repair and recombination protein radA	4.19566e+06
ch05	45523662	45531357	4.55275e+07	ID=PGSC0003DMG401007021	name=O-sialoglycoprotein endopeptidase	4.20303e+06
ch05	45518051	45520177	45519114	ID=PGSC0003DMG402007021	name=Conserved gene of unknown function	4211422
ch05	45461751	45467174	4.54645e+07	ID=PGSC0003DMG400007022	name=Spindle and kinetochore-associated protein 1 homolog	4.26607e+06
ch05	45440835	45447184	4.5444e+07	ID=PGSC0003DMG400044129	name='chromo' domain containing protein	4.28653e+06
ch05	45421783	45429898	4.54258e+07	ID=PGSC0003DMG400006993	name=Class III peroxidase	4.3047e+06
ch05	45419936	45421529	4.54207e+07	ID=PGSC0003DMG400007023	name=PEThy	4.3098e+06
ch05	45403407	45410208	4.54068e+07	ID=PGSC0003DMG400006994	name=Protein transport protein Sec61 subunit beta	4.32373e+06
ch05	45398598	45403131	4.54009e+07	ID=PGSC0003DMG400007024	name=Proteophosphoglycan ppg4	4.32967e+06
ch05	45387138	45388088	45387613	ID=PGSC0003DMG400007025	name=AP2/ERF domain-containing transcription factor	4342923
ch05	45358365	45363834	4.53611e+07	ID=PGSC0003DMG400007026	name=DnaJ homolog protein	4.36944e+06
ch05	45350270	45354893	4.53526e+07	ID=PGSC0003DMG400006995	name=PRIB5 protein	4.37795e+06
ch05	45345750	45346319	4.5346e+07	ID=PGSC0003DMG400007027	name=ERF1	4.3845e+06
ch05	45323644	45324028	45323836	ID=PGSC0003DMG400006996	name=Gene of unknown function	4406700
ch05	45299842	45309421	4.53046e+07	ID=PGSC0003DMG402007028	name=Serine carboxypeptidase	4.4259e+06
ch05	45289867	45293659	45291763	ID=PGSC0003DMG400007029	name=1-O-acylglucose:anthocyanin-O-acyltransferase	4438773
ch05	45264882	45272376	45268629	ID=PGSC0003DMG400007030	name=Transposase	4461907
ch05	45218755	45229404	4.52241e+07	ID=PGSC0003DMG401007028	name=1-O-acylglucose:anthocyanin-O-acyltransferase	4.50646e+06
ch05	45209428	45211434	45210431	ID=PGSC0003DMG400006997	name=Anthranilate N-benzoyltransferase protein	4520105
ch05	45207866	45208993	4.52084e+07	ID=PGSC0003DMG400006998	name=Calcium-binding EF-hand protein	4.52211e+06
ch05	45195916	45200097	4.5198e+07	ID=PGSC0003DMG400007031	name=Gene of unknown function	4.53253e+06
ch05	45155679	45156095	45155887	ID=PGSC0003DMG400007032	name=Stigma-specific Stig1 family protein	4574649
ch05	45144739	45151406	4.51481e+07	ID=PGSC0003DMG400006999	name=Conserved gene of unknown function	4.58246e+06
ch05	45140984	45143663	4.51423e+07	ID=PGSC0003DMG400007000	name=1-O-acylceramide synthase	4.58821e+06
ch05	45139038	45140273	4.51397e+07	ID=PGSC0003DMG400007033	name=Leucine-rich repeat family protein	4.59088e+06
ch05	45118796	45126277	4.51225e+07	ID=PGSC0003DMG400007001	name=Protein kinase 2 beta chain	4.608e+06
ch05	45115440	45116725	4.51161e+07	ID=PGSC0003DMG400007002	name=Serine/threonine protein kinase	4.61445e+06
ch05	45104261	45105616	4.51049e+07	ID=PGSC0003DMG400042098	name=Conserved gene of unknown function	4.6256e+06
ch05	45100982	45101538	45101260	ID=PGSC0003DMG400007042	name=Gene of unknown function	4629276
ch05	45098505	45099395	45098950	ID=PGSC0003DMG400045106	name=Conserved gene of unknown function	4631586
ch05	45091491	45093295	45092393	ID=PGSC0003DMG400007003	name=Conserved gene of unknown function	4638143
ch05	45088228	45089655	4.50889e+07	ID=PGSC0003DMG400041587	name=Conserved gene of unknown function	4.64159e+06
ch05	45084786	45086070	45085428	ID=PGSC0003DMG400007004	name=Kinase family protein	4645108
ch05	45080917	45082299	45081608	ID=PGSC0003DMG400038972	name=Conserved gene of unknown function	4648928
ch05	45072208	45078454	45075331	ID=PGSC0003DMG400007005	name=Conserved gene of unknown function	4655205
ch05	45066289	45067583	45066936	ID=PGSC0003DMG400035338	name=Kinase family protein	4663600
ch05	45060279	45065122	4.50627e+07	ID=PGSC0003DMG400007006	name=Arsenical pump-driving atpase	4.66784e+06
ch05	45055826	45056930	45056378	ID=PGSC0003DMG400007007	name=ATP synthase	4674158
ch05	45030756	45032875	4.50318e+07	ID=PGSC0003DMG400007008	name=Conserved gene of unknown function	4.69872e+06
ch05	45026750	45030968	45028859	ID=PGSC0003DMG402007034	name=Laccase	4701677
ch05	45026804	45027578	45027191	ID=PGSC0003DMG401007034	name=Laccase	4703345
ch05	45021131	45021677	45021404	ID=PGSC0003DMG400007045	name=Conserved gene of unknown function	4709132
ch05	45020017	45020319	45020168	ID=PGSC0003DMG400043269	name=Gene of unknown function	4710368
ch05	45015743	45016348	4.5016e+07	ID=PGSC0003DMG400007009	name=Gene of unknown function	4.71449e+06
ch05	45010375	45015097	45012736	ID=PGSC0003DMG400007035	name=Conserved gene of unknown function	4717800
ch05	44997342	44998228	44997785	ID=PGSC0003DMG400007036	name=Ethylene-responsive transcription factor ERF023	4732751
ch05	44972458	44975071	4.49738e+07	ID=PGSC0003DMG400007010	name=Myc2 bHLH protein	4.75677e+06
ch05	44953697	44955902	4.49548e+07	ID=PGSC0003DMG400007011	name=Molybdopterin cofactor synthesis protein A	4.77574e+06
ch05	44943787	44948325	44946056	ID=PGSC0003DMG400007012	name=Ubiquitin ligase SINAT3	4784480
ch05	44939296	44942674	44940985	ID=PGSC0003DMG400007037	name=Phosphatidylinositol 3-and 4-kinase family protein	4789551
ch05	44919776	44920720	44920248	ID=PGSC0003DMG400007013	name=Phragmoplastin	4810288
ch05	44913810	44918918	44916364	ID=PGSC0003DMG400007038	name=Tetratricopeptide repeat (TPR)-containing protein	4814172
ch05	44882421	44882840	4.48826e+07	ID=PGSC0003DMG400007039	name=Gene of unknown function	4.84791e+06
ch05	44879958	44880518	44880238	ID=PGSC0003DMG400007040	name=Conserved gene of unknown function	4850298
ch05	44874699	44875445	44875072	ID=PGSC0003DMG400007047	name=Conserved gene of unknown function	4855464
ch05	44870577	44871329	44870953	ID=PGSC0003DMG400035095	name=Gene of unknown function	4859583
ch05	44868221	44868778	4.48685e+07	ID=PGSC0003DMG400036334	name=Gene of unknown function	4.86204e+06
ch05	44854958	44857201	4.48561e+07	ID=PGSC0003DMG400038868	name=Conserved gene of unknown function	4.87446e+06
ch05	44849090	44849512	44849301	ID=PGSC0003DMG400047299	name=Conserved gene of unknown function	4881235
ch05	44770354	44771640	44770997	ID=PGSC0003DMG400037637	name=Gene of unknown function	4959539
ch05	44763235	44764517	44763876	ID=PGSC0003DMG400039877	name=Conserved gene of unknown function	4966660
ch05	44734562	44734981	4.47348e+07	ID=PGSC0003DMG400044155	name=Gene of unknown function	4.99576e+06

## Sheet: Zn Candidate genes
Supplementary Table 5: The genes retrieved from the potato reference genome to find possible candidate genes from the QTL's genomic regions spanning upto 5 Mbp for Zn
chr	start	end	mid	ID	Name	hit_dist
ch07	10832288	10839563	1.08359e+07	ID=PGSC0003DMG400004101	name=H(+)-transporting ATPase	681.5
ch07	10874435	10880026	1.08772e+07	ID=PGSC0003DMG400004100	name=Acetyl-CoA synthetase	40623.5
ch07	10880662	10889650	10885156	ID=PGSC0003DMG400004091	name=Conserved gene of unknown function	48549
ch07	10923636	10924432	10924034	ID=PGSC0003DMG400004099	name=Gene of unknown function	87427
ch07	10927140	10929269	1.09282e+07	ID=PGSC0003DMG400004090	name=Peroxidase	91597.5
ch07	10965391	10968573	10966982	ID=PGSC0003DMG400043374	name=RCG54033	130375
ch07	10699385	10699882	1.06996e+07	ID=PGSC0003DMG400004103	name=Gene of unknown function	136974
ch07	10690491	10690982	1.06907e+07	ID=PGSC0003DMG400004104	name=Gene of unknown function	145870
ch07	10687264	10688025	1.06876e+07	ID=PGSC0003DMG400004105	name=Gene of unknown function	148962
ch07	10995789	10998933	10997361	ID=PGSC0003DMG400004098	name=Nucleolar protein,Nop52 containing protein	160754
ch07	11010900	11013949	1.10124e+07	ID=PGSC0003DMG400004097	name=Ribulose bisphosphate carboxylase small chain	175818
ch07	10653367	10656366	1.06549e+07	ID=PGSC0003DMG400004093	name=Pentatricopeptide repeat-containing protein	181740
ch07	11014579	11023102	1.10188e+07	ID=PGSC0003DMG400004088	name=U4/U6.U5 tri-snRNP-associated protein	182234
ch07	11024307	11029912	1.10271e+07	ID=PGSC0003DMG400004096	name=Gene of unknown function	190502
ch07	11030467	11030811	11030639	ID=PGSC0003DMG400040274	name=Gene of unknown function	194032
ch07	11045930	11047246	11046588	ID=PGSC0003DMG400039174	name=Gene of unknown function	209981
ch07	10619528	10622576	10621052	ID=PGSC0003DMG400002303	name=Glucan endo-1,3-beta-glucosidase	215555
ch07	11062851	11070929	11066890	ID=PGSC0003DMG400004095	name=Ferredoxin--NADP reductase, root-type isozyme, chloroplastic	230283
ch07	10595368	10597526	10596447	ID=PGSC0003DMG400043928	name=Gene of unknown function	240160
ch07	10593567	10593980	1.05938e+07	ID=PGSC0003DMG400037416	name=Gene of unknown function	242834
ch07	10535408	10536883	1.05361e+07	ID=PGSC0003DMG400002304	name=Tac7077	300462
ch07	11141550	11145225	1.11434e+07	ID=PGSC0003DMG400004087	name=DNA binding protein	306780
ch07	10521817	10523444	1.05226e+07	ID=PGSC0003DMG400002302	name=Aminoadipic semialdehyde synthase	313976
ch07	10510768	10521310	10516039	ID=PGSC0003DMG400002301	name=Bifunctional lysine-ketoglutarate reductase/saccharopine dehydrogenase	320568
ch07	11162880	11163251	1.11631e+07	ID=PGSC0003DMG400046349	name=Conserved gene of unknown function	326458
ch07	10498306	10507299	1.05028e+07	ID=PGSC0003DMG400002300	name=RNA lariat debranching enzyme	333804
ch07	10469383	10473611	10471497	ID=PGSC0003DMG400043037	name=Gene of unknown function	365110
ch07	10463257	10468014	1.04656e+07	ID=PGSC0003DMG400046812	name=Gene of unknown function	370972
ch07	11248310	11253339	1.12508e+07	ID=PGSC0003DMG400004086	name=Heat shock	414218
ch07	10356013	10356992	1.03565e+07	ID=PGSC0003DMG400028094	name=Gene of unknown function	480104
ch07	11351388	11353060	11352224	ID=PGSC0003DMG400034775	name=Integrase core domain containing protein	515617
ch07	10313192	10314250	10313721	ID=PGSC0003DMG400045131	name=Conserved gene of unknown function	522886
ch07	11360451	11362907	11361679	ID=PGSC0003DMG400046210	name=Gene of unknown function	525072
ch07	10307834	10308178	10308006	ID=PGSC0003DMG400036074	name=Gene of unknown function	528601
ch07	11397635	11400188	1.13989e+07	ID=PGSC0003DMG400042689	name=Serine/arginine repetitive matrix 2 isoform 1	562304
ch07	10270351	10277021	10273686	ID=PGSC0003DMG402015935	name=Aminoadipic semialdehyde synthase	562921
ch07	10261676	10268244	10264960	ID=PGSC0003DMG401015935	name=Aminoadipic semialdehyde synthase	571647
ch07	11464296	11464622	11464459	ID=PGSC0003DMG400038488	name=Gene of unknown function	627852
ch07	10202786	10205342	10204064	ID=PGSC0003DMG400015943	name=Gene of unknown function	632543
ch07	10170233	10171519	10170876	ID=PGSC0003DMG400015934	name=Gene of unknown function	665731
ch07	10157101	10164123	10160612	ID=PGSC0003DMG400015933	name=Pectinesterase PPE8B	675995
ch07	10132059	10132460	1.01323e+07	ID=PGSC0003DMG400035984	name=Gene of unknown function	704348
ch07	10110243	10110644	1.01104e+07	ID=PGSC0003DMG400037673	name=Gene of unknown function	726164
ch07	11605714	11610849	1.16083e+07	ID=PGSC0003DMG400005483	name=Multidrug/pheromone exporter, MDR family, ABC transporter family	771674
ch07	11618841	11619170	1.1619e+07	ID=PGSC0003DMG400037795	name=Gene of unknown function	782398
ch07	11635579	11640862	1.16382e+07	ID=PGSC0003DMG400005484	name=Protein kinase family protein	801614
ch07	10027998	10030937	1.00295e+07	ID=PGSC0003DMG400015942	name=Pectinesterase	807140
ch07	11716935	11722201	11719568	ID=PGSC0003DMG400045690	name=Gene of unknown function	882961
ch07	11774272	11775578	11774925	ID=PGSC0003DMG400046084	name='chromo' domain containing protein	938318
ch07	9891524	9892086	9891805	ID=PGSC0003DMG402015931	name=Zinc ion binding protein	944802
ch07	9879370	9884214	9881792	ID=PGSC0003DMG401015931	name=Red protein	954815
ch07	11792599	11797949	11795274	ID=PGSC0003DMG401005482	name=E2F4,5	958667
ch07	11802582	11806884	11804733	ID=PGSC0003DMG402005482	name=Receptor-kinase	968126
ch07	11816445	11821410	1.18189e+07	ID=PGSC0003DMG400005485	name=Receptor-kinase	982320
ch07	11892048	11892635	1.18923e+07	ID=PGSC0003DMG400002423	name=Transferase, transferring glycosyl groups	1.05573e+06
ch07	11916750	11917289	1.1917e+07	ID=PGSC0003DMG402002421	name=Yip1 domain family member 6	1.08041e+06
ch07	11916739	11922679	11919709	ID=PGSC0003DMG401002421	name=Integral membrane Yip1 family protein	1083102
ch07	9730043	9731824	9.73093e+06	ID=PGSC0003DMG400009555	name=Conserved gene of unknown function	1.10567e+06
ch07	11945990	11953753	1.19499e+07	ID=PGSC0003DMG400002422	name=Integral membrane Yip1 family protein	1.11326e+06
ch07	11970215	11971299	11970757	ID=PGSC0003DMG400002420	name=GNS1/SUR4 membrane protein	1134150
ch07	9662617	9663540	9.66308e+06	ID=PGSC0003DMG400009563	name=3-phosphoinositide-dependent protein kinase-1	1.17353e+06
ch07	9659527	9660221	9659874	ID=PGSC0003DMG400044885	name=Replication protein A 70 kDa DNA-binding subunit	1176733
ch07	12055773	12058400	1.20571e+07	ID=PGSC0003DMG400002440	name=Gene of unknown function	1.22048e+06
ch07	12092688	12093942	12093315	ID=PGSC0003DMG400042859	name=Gene of unknown function	1256708
ch07	9570145	9573466	9.57181e+06	ID=PGSC0003DMG400044757	name=Gene of unknown function	1.2648e+06
ch07	9561336	9561755	9.56155e+06	ID=PGSC0003DMG400039865	name=Gene of unknown function	1.27506e+06
ch07	9559770	9560921	9.56035e+06	ID=PGSC0003DMG400035795	name=Gene of unknown function	1.27626e+06
ch07	9548158	9554603	9.55138e+06	ID=PGSC0003DMG401009562	name=Pseudouridine synthase	1.28523e+06
ch07	12131390	12135943	1.21337e+07	ID=PGSC0003DMG400002438	name=Gene of unknown function	1.29706e+06
ch07	9520667	9526419	9523543	ID=PGSC0003DMG402009562	name=Pseudouridine synthase	1313064
ch07	12151846	12152620	12152233	ID=PGSC0003DMG400028077	name=Ulp1 protease family, C-terminal catalytic domain containing protein	1315626
ch07	12153009	12155137	12154073	ID=PGSC0003DMG400028076	name=Ulp1 protease family, C-terminal catalytic domain containing protein	1317466
ch07	9512724	9516467	9.5146e+06	ID=PGSC0003DMG400009561	name=Receptor kinase	1.32201e+06
ch07	9467075	9469234	9.46815e+06	ID=PGSC0003DMG400043320	name=Gag-pol polyprotein	1.36845e+06
ch07	9438118	9441094	9439606	ID=PGSC0003DMG400009560	name=Conserved gene of unknown function	1397001
ch07	9404771	9407668	9.40622e+06	ID=PGSC0003DMG400009559	name=Specific tissue protein 1	1.43039e+06
ch07	9386138	9386686	9386412	ID=PGSC0003DMG400035143	name=Conserved gene of unknown function	1450195
ch07	9371498	9374997	9.37325e+06	ID=PGSC0003DMG400042287	name=Gene of unknown function	1.46336e+06
ch07	9361677	9364078	9.36288e+06	ID=PGSC0003DMG400009558	name=Specific tissue protein 2	1.47373e+06
ch07	9347223	9348365	9347794	ID=PGSC0003DMG400009557	name=Specific tissue protein 2	1488813
ch07	9321515	9321904	9.32171e+06	ID=PGSC0003DMG400009565	name=Gene of unknown function	1.5149e+06
ch07	9312555	9316088	9.31432e+06	ID=PGSC0003DMG400009556	name=Replication factor A 1, rfa1	1.52229e+06
ch07	12358095	12361847	12359971	ID=PGSC0003DMG400013773	name=Integrase core domain containing protein	1523364
ch07	9306564	9307626	9307095	ID=PGSC0003DMG400020027	name=Proteasome subunit beta type-6	1529512
ch07	12369879	12374810	1.23723e+07	ID=PGSC0003DMG400013774	name=Gene of unknown function	1.53574e+06
ch07	12382057	12382575	12382316	ID=PGSC0003DMG400013781	name=Gene of unknown function	1545709
ch07	9286240	9289189	9.28771e+06	ID=PGSC0003DMG400020028	name=Specific tissue protein 2	1.54889e+06
ch07	9280083	9283783	9281933	ID=PGSC0003DMG400020029	name=Gene of unknown function	1554674
ch07	12402441	12403142	1.24028e+07	ID=PGSC0003DMG400041191	name=Gene of unknown function	1.56618e+06
ch07	12413346	12417359	1.24154e+07	ID=PGSC0003DMG401013782	name=Transcription factor	1.57875e+06
ch07	12417499	12418436	1.2418e+07	ID=PGSC0003DMG402013782	name=AP2 domain-containing transcription factor	1.58136e+06
ch07	12420262	12426753	1.24235e+07	ID=PGSC0003DMG403013782	name=Replication factor A	1.5869e+06
ch07	12431493	12435237	12433365	ID=PGSC0003DMG400040608	name=Zinc knuckle family protein	1596758
ch07	12446057	12448355	12447206	ID=PGSC0003DMG400013783	name=Conserved gene of unknown function	1610599
ch07	9212947	9222495	9217721	ID=PGSC0003DMG400009772	name=Proteasome subunit beta type-6	1618886
ch07	9124243	9131912	9.12808e+06	ID=PGSC0003DMG400009773	name=Auxin response factor 19	1.70853e+06
ch07	9119438	9124150	9121794	ID=PGSC0003DMG400009774	name=Arabinose kinase	1714813
ch07	9079120	9082256	9080688	ID=PGSC0003DMG400009775	name=Ripening regulated protein DDTFR10	1755919
ch07	12605141	12611443	12608292	ID=PGSC0003DMG400013775	name=Gene of unknown function	1771685
ch07	12613912	12617741	1.26158e+07	ID=PGSC0003DMG400013787	name=Gene of unknown function	1.77922e+06
ch07	9054235	9054996	9.05462e+06	ID=PGSC0003DMG400038007	name=Zinc finger protein	1.78199e+06
ch07	12623492	12626007	1.26247e+07	ID=PGSC0003DMG400013788	name=Gene of unknown function	1.78814e+06
ch07	12635684	12637807	1.26367e+07	ID=PGSC0003DMG400013776	name=Two-component system sensor histidine kinase/response regulator	1.80014e+06
ch07	12639719	12640135	12639927	ID=PGSC0003DMG400047257	name=Gene of unknown function	1803320
ch07	12654263	12656022	1.26551e+07	ID=PGSC0003DMG400039749	name=Zinc knuckle family protein	1.81854e+06
ch07	8976906	8978363	8.97763e+06	ID=PGSC0003DMG400002401	name=Cytochrome P450-dependent fatty acid hydroxylase	1.85897e+06
ch07	12692437	12699469	12695953	ID=PGSC0003DMG400013784	name=Retrotransposon protein, unclassified	1859346
ch07	8966160	8967113	8.96664e+06	ID=PGSC0003DMG400034407	name=Gene of unknown function	1.86997e+06
ch07	12709447	12713018	1.27112e+07	ID=PGSC0003DMG400038695	name=Gene of unknown function	1.87463e+06
ch07	12736318	12739515	1.27379e+07	ID=PGSC0003DMG400044750	name=Gene of unknown function	1.90131e+06
ch07	12779796	12782999	1.27814e+07	ID=PGSC0003DMG400039994	name=Gene of unknown function	1.94479e+06
ch07	12806234	12807531	1.28069e+07	ID=PGSC0003DMG400041408	name=Gag-pol polyprotein	1.97028e+06
ch07	12833169	12835038	1.28341e+07	ID=PGSC0003DMG400041683	name=Gene of unknown function	1.9975e+06
ch07	8814017	8814403	8814210	ID=PGSC0003DMG400039721	name=Gene of unknown function	2022397
ch07	8750768	8753656	8752212	ID=PGSC0003DMG400021020	name=Gene of unknown function	2084395
ch07	12926961	12935489	12931225	ID=PGSC0003DMG400043285	name=Gene of unknown function	2094618
ch07	8740708	8743263	8.74199e+06	ID=PGSC0003DMG400021019	name=Arginine decarboxylase	2.09462e+06
ch07	8730960	8732610	8731785	ID=PGSC0003DMG400021018	name=Serine-threonine protein kinase, plant-type	2104822
ch07	8718968	8719738	8719353	ID=PGSC0003DMG400021021	name=Mitochondrial import receptor subunit TOM7-1	2117254
ch07	8716533	8717888	8.71721e+06	ID=PGSC0003DMG400037355	name=Hydroxycinnamoyl CoA shikimate/quinate hydroxycinnamoyltransferase	2.1194e+06
ch07	8702329	8705860	8.70409e+06	ID=PGSC0003DMG400021017	name=Serine-threonine protein kinase, plant-type	2.13251e+06
ch07	13009646	13015364	13012505	ID=PGSC0003DMG400013779	name=NADPH-cytochrome P450 oxidoreductase	2175898
ch07	8629554	8635725	8.63264e+06	ID=PGSC0003DMG400039413	name=Gene of unknown function	2.20397e+06
ch07	8615784	8616857	8.61632e+06	ID=PGSC0003DMG400029953	name=Conserved gene of unknown function	2.22029e+06
ch07	13079193	13083270	1.30812e+07	ID=PGSC0003DMG400044965	name=Ulp1 protease family, C-terminal catalytic domain containing protein	2.24462e+06
ch07	13088083	13088523	13088303	ID=PGSC0003DMG400045468	name=Gene of unknown function	2251696
ch07	8576841	8577953	8577397	ID=PGSC0003DMG400029968	name=Gene of unknown function	2259210
ch07	8560420	8567130	8563775	ID=PGSC0003DMG400029960	name=Auxin-induced protein 5NG4	2272832
ch07	8542219	8549612	8.54592e+06	ID=PGSC0003DMG402029961	name=NBS-coding resistance protein	2.29069e+06
ch07	8542324	8544217	8.54327e+06	ID=PGSC0003DMG401029961	name=NBS-coding resistance protein	2.29334e+06
ch07	13147175	13149603	13148389	ID=PGSC0003DMG400035511	name=Integrase core domain containing protein	2311782
ch07	8520702	8527108	8523905	ID=PGSC0003DMG400029954	name=Polygalacturonase	2312702
ch07	8515759	8520484	8.51812e+06	ID=PGSC0003DMG400029962	name=Peptide deformylase 1A, chloroplastic	2.31849e+06
ch07	13166454	13166819	1.31666e+07	ID=PGSC0003DMG400043887	name=Gene of unknown function	2.33003e+06
ch07	8500034	8501973	8.501e+06	ID=PGSC0003DMG400034801	name=Gene of unknown function	2.3356e+06
ch07	8471618	8475366	8473492	ID=PGSC0003DMG400029963	name=Transposase En/Spm	2363115
ch07	8453066	8453629	8.45335e+06	ID=PGSC0003DMG400029955	name=Gene of unknown function	2.38326e+06
ch07	13222855	13226548	1.32247e+07	ID=PGSC0003DMG400034817	name=Conserved gene of unknown function	2.38809e+06
ch07	8424206	8425852	8425029	ID=PGSC0003DMG400029956	name=F-box family protein	2411578
ch07	13254906	13255256	13255081	ID=PGSC0003DMG400043142	name=Transcription factor	2418474
ch07	13304903	13309286	1.33071e+07	ID=PGSC0003DMG400024453	name=Glycerol-3-phosphatase 2	2.47049e+06
ch07	8357046	8361081	8.35906e+06	ID=PGSC0003DMG400029964	name=Phospholipase A2	2.47754e+06
ch07	8301782	8302723	8.30225e+06	ID=PGSC0003DMG400041758	name=Ubiquitin-protein ligase	2.53435e+06
ch07	13385434	13385865	1.33856e+07	ID=PGSC0003DMG400047072	name=Integrase core domain containing protein	2.54904e+06
ch07	13394842	13395228	13395035	ID=PGSC0003DMG400042394	name=Integrase core domain containing protein	2558428
ch07	8268259	8268642	8.26845e+06	ID=PGSC0003DMG400037548	name=Integrase core domain containing protein	2.56816e+06
ch07	13428500	13430171	1.34293e+07	ID=PGSC0003DMG400041528	name=Gene of unknown function	2.59273e+06
ch07	13457466	13459220	13458343	ID=PGSC0003DMG400003139	name=Conserved gene of unknown function	2621736
ch07	8208261	8214731	8211496	ID=PGSC0003DMG400029965	name=Non-LTR retroelement reverse transcriptase	2625111
ch07	8188850	8194714	8191782	ID=PGSC0003DMG400029966	name=Sodium transporter hkt1	2644825
ch07	13480661	13483439	13482050	ID=PGSC0003DMG400041718	name=Gene of unknown function	2645443
ch07	13487804	13488733	1.34883e+07	ID=PGSC0003DMG400035277	name=Conserved gene of unknown function	2.65166e+06
ch07	8168812	8171551	8.17018e+06	ID=PGSC0003DMG400029967	name=Cytochrome P450	2.66643e+06
ch07	8151704	8152102	8151903	ID=PGSC0003DMG400038088	name=AT hook motif family protein	2684704
ch07	8140638	8146318	8143478	ID=PGSC0003DMG400042125	name='chromo' domain containing protein	2693129
ch07	8121932	8122333	8.12213e+06	ID=PGSC0003DMG400037466	name=AT hook motif family protein	2.71447e+06
ch07	13560078	13562251	1.35612e+07	ID=PGSC0003DMG400046214	name=Gene of unknown function	2.72456e+06
ch07	13591260	13592264	13591762	ID=PGSC0003DMG400043735	name=Retrotransposon	2755155
ch07	8075570	8077016	8076293	ID=PGSC0003DMG400029959	name=ADP-ribosylation factor	2760314
ch07	13611800	13616813	1.36143e+07	ID=PGSC0003DMG400037876	name=Gene of unknown function	2.7777e+06
ch07	13617561	13620318	1.36189e+07	ID=PGSC0003DMG400042526	name=Gene of unknown function	2.78233e+06
ch07	13629683	13639299	13634491	ID=PGSC0003DMG400003138	name=Elongation factor Ts	2797884
ch07	13639831	13646363	13643097	ID=PGSC0003DMG400040176	name=Gag-pol protein	2806490
ch07	13688952	13698115	1.36935e+07	ID=PGSC0003DMG400039590	name=Conserved gene of unknown function	2.85693e+06
ch07	13698167	13701787	13699977	ID=PGSC0003DMG400046184	name=Polyprotein	2863370
ch07	7968602	7971179	7.96989e+06	ID=PGSC0003DMG402020702	name=Reverse transcriptase	2.86672e+06
ch07	7962918	7966149	7.96453e+06	ID=PGSC0003DMG401020702	name=ADP-ribosylation factor	2.87207e+06
ch07	13717582	13719034	13718308	ID=PGSC0003DMG400003135	name=DNA mismatch repair protein MSH6-2	2881701
ch07	7937405	7938388	7.9379e+06	ID=PGSC0003DMG400020701	name=SAUR family protein	2.89871e+06
ch07	7909837	7918053	7913945	ID=PGSC0003DMG400020700	name=Phosphatidylinositol glycan	2922662
ch07	13761979	13765181	13763580	ID=PGSC0003DMG400044724	name=Gene of unknown function	2926973
ch07	13776897	13777233	13777065	ID=PGSC0003DMG400034969	name=Gene of unknown function	2940458
ch07	7890206	7894278	7892242	ID=PGSC0003DMG400020699	name=Isoamylase isoform 1	2944365
ch07	13784107	13784902	1.37845e+07	ID=PGSC0003DMG400035968	name=Conserved gene of unknown function	2.9479e+06
ch07	13785171	13785903	13785537	ID=PGSC0003DMG400047090	name=Gene of unknown function	2948930
ch07	13815492	13815839	1.38157e+07	ID=PGSC0003DMG400036904	name=Gene of unknown function	2.97906e+06
ch07	7836867	7845382	7.84112e+06	ID=PGSC0003DMG400020694	name=Gene of unknown function	2.99548e+06
ch07	7801902	7803845	7.80287e+06	ID=PGSC0003DMG400020693	name=Gene of unknown function	3.03373e+06
ch07	13892019	13899769	13895894	ID=PGSC0003DMG400042392	name=Integrase core domain containing protein	3059287
ch07	7770972	7773841	7.77241e+06	ID=PGSC0003DMG400020698	name=Gene of unknown function	3.0642e+06
ch07	7748250	7749527	7.74889e+06	ID=PGSC0003DMG400020692	name=Gag-pro	3.08772e+06
ch07	13930938	13937024	13933981	ID=PGSC0003DMG400022089	name=Heat shock protein DnaJ	3097374
ch07	7738765	7739550	7.73916e+06	ID=PGSC0003DMG400034810	name=Conserved gene of unknown function	3.09745e+06
ch07	7734759	7738042	7.7364e+06	ID=PGSC0003DMG400020691	name=Protein ycf2	3.10021e+06
ch07	7729171	7730898	7.73003e+06	ID=PGSC0003DMG400020690	name=Conserved gene of unknown function	3.10657e+06
ch07	7718357	7721383	7719870	ID=PGSC0003DMG400037920	name=Gene of unknown function	3116737
ch07	7703307	7707271	7705289	ID=PGSC0003DMG400020697	name=Conserved gene of unknown function	3131318
ch07	7697417	7699005	7698211	ID=PGSC0003DMG400036056	name=Gene of unknown function	3138396
ch07	13978892	13982072	13980482	ID=PGSC0003DMG400022092	name=Gene of unknown function	3143875
ch07	7690270	7690840	7690555	ID=PGSC0003DMG400020689	name=Antifungal protein	3146052
ch07	7686336	7686831	7.68658e+06	ID=PGSC0003DMG400020703	name=Antifungal protein	3.15002e+06
ch07	7676790	7684199	7.68049e+06	ID=PGSC0003DMG400020688	name=Phosphoethanolamine cytidylyltransferase	3.15611e+06
ch07	14053953	14055947	14054950	ID=PGSC0003DMG400044458	name=Gene of unknown function	3218343
ch07	7602027	7604474	7.60325e+06	ID=PGSC0003DMG400008518	name=Gene of unknown function	3.23336e+06
ch07	7589283	7598921	7594102	ID=PGSC0003DMG400008507	name=Conserved gene of unknown function	3242505
ch07	7579804	7587829	7.58382e+06	ID=PGSC0003DMG400008519	name=Inactive purple acid phosphatase 28	3.25279e+06
ch07	7577647	7578290	7.57797e+06	ID=PGSC0003DMG400034382	name=Zinc finger, GRF-type	3.25864e+06
ch07	7567023	7570497	7568760	ID=PGSC0003DMG400008508	name=S-locus-specific glycoprotein S6	3267847
ch07	14133317	14136375	14134846	ID=PGSC0003DMG400036396	name=Gene of unknown function	3298239
ch07	7524191	7525826	7.52501e+06	ID=PGSC0003DMG400008521	name=Gene of unknown function	3.3116e+06
ch07	7521051	7522452	7.52175e+06	ID=PGSC0003DMG400008510	name=F-box protein	3.31486e+06
ch07	7519450	7520619	7.52003e+06	ID=PGSC0003DMG400008522	name=F-box protein	3.31657e+06
ch07	7513472	7513810	7513641	ID=PGSC0003DMG400038373	name=Gene of unknown function	3322966
ch07	7509429	7509963	7509696	ID=PGSC0003DMG400008526	name=S-locus lectin protein kinase family protein	3326911
ch07	14163601	14164143	14163872	ID=PGSC0003DMG400015960	name=Photosystem I P700 chlorophyll a apoprotein A1	3327265
ch07	7504819	7508141	7506480	ID=PGSC0003DMG400008523	name=S-locus lectin protein kinase family protein	3330127
ch07	7499230	7502018	7500624	ID=PGSC0003DMG400008524	name=F-box family protein	3335983
ch07	7457774	7461155	7.45946e+06	ID=PGSC0003DMG400008511	name=NAD(+) ADP-ribosyltransferase-3	3.37714e+06
ch07	7439455	7440994	7.44022e+06	ID=PGSC0003DMG400008527	name=Gene of unknown function	3.39638e+06
ch07	7428827	7432284	7.43056e+06	ID=PGSC0003DMG400008512	name=Dopamine beta-monooxygenase	3.40605e+06
ch07	7426415	7427957	7427186	ID=PGSC0003DMG400008513	name=Acidic ribosomal protein P3	3409421
ch07	14245967	14246403	14246185	ID=PGSC0003DMG400037773	name=Gene of unknown function	3409578
ch07	7415137	7424704	7.41992e+06	ID=PGSC0003DMG400008514	name=Conserved gene of unknown function	3.41669e+06
ch07	14297372	14305636	14301504	ID=PGSC0003DMG400035273	name=Integrase core domain containing protein	3464897
ch07	7358489	7359341	7358915	ID=PGSC0003DMG400008516	name=Pit1 protein	3477692
ch07	14323087	14323935	14323511	ID=PGSC0003DMG400040384	name=Gene of unknown function	3486904
ch07	14324284	14328736	14326510	ID=PGSC0003DMG400045217	name=Gene of unknown function	3489903
ch07	7338620	7340320	7339470	ID=PGSC0003DMG400039075	name=Histidine-rich glycoprotein	3497137
ch07	14347951	14351092	1.43495e+07	ID=PGSC0003DMG400015961	name=Glyoxal oxidase	3.51291e+06
ch07	14387513	14389990	1.43888e+07	ID=PGSC0003DMG400041818	name=Integrase core domain containing protein	3.55214e+06
ch07	14432790	14434449	1.44336e+07	ID=PGSC0003DMG400044926	name=Zinc knuckle family protein	3.59701e+06
ch07	7238828	7239299	7.23906e+06	ID=PGSC0003DMG400043622	name=Gene of unknown function	3.59754e+06
ch07	7207587	7209345	7208466	ID=PGSC0003DMG400024205	name=Pit1 protein	3628141
ch07	7185083	7189114	7.1871e+06	ID=PGSC0003DMG400024200	name=Tetratricopeptide-like helical	3.64951e+06
ch07	7183531	7184965	7184248	ID=PGSC0003DMG400024201	name=Xylem serine proteinase 1	3652359
ch07	7177091	7177429	7177260	ID=PGSC0003DMG400044610	name=Subtilase	3659347
ch07	7168026	7177489	7.17276e+06	ID=PGSC0003DMG400024206	name=N protein	3.66385e+06
ch07	7153785	7155709	7154747	ID=PGSC0003DMG400024207	name=Subtilase	3681860
ch07	14518532	14519870	14519201	ID=PGSC0003DMG400041507	name=Gene of unknown function	3682594
ch07	7153161	7153718	7.15344e+06	ID=PGSC0003DMG400040381	name=Xylem serine proteinase 1	3.68317e+06
ch07	7146504	7149035	7.14777e+06	ID=PGSC0003DMG400024202	name=Disease resistance protein BS2	3.68884e+06
ch07	7141501	7144579	7143040	ID=PGSC0003DMG400024203	name=Disease resistance protein BS2	3693567
ch07	7136081	7140649	7138365	ID=PGSC0003DMG400024204	name=Nudix hydrolase 24	3698242
ch07	14550698	14554187	1.45524e+07	ID=PGSC0003DMG400044481	name=Polyprotein	3.71584e+06
ch07	14556350	14558597	1.45575e+07	ID=PGSC0003DMG400043067	name=Gene of unknown function	3.72087e+06
ch07	14559928	14561764	14560846	ID=PGSC0003DMG400034399	name=Gene of unknown function	3724239
ch07	7105282	7112685	7.10898e+06	ID=PGSC0003DMG400024208	name=Neighbor of COX4	3.72762e+06
ch07	14574602	14578697	1.45766e+07	ID=PGSC0003DMG400039722	name=Conserved gene of unknown function	3.74004e+06
ch07	7079087	7098576	7.08883e+06	ID=PGSC0003DMG400024209	name=Ubiquinone biosynthesis protein coq-8	3.74778e+06
ch07	7049853	7056885	7053369	ID=PGSC0003DMG402024210	name=26S proteasome subunit RPN7	3783238
ch07	7049935	7051121	7050528	ID=PGSC0003DMG401024210	name=26S proteasome subunit RPN7	3786079
ch07	14640938	14641306	14641122	ID=PGSC0003DMG400042165	name=Gene of unknown function	3804515
ch07	14711298	14711990	14711644	ID=PGSC0003DMG400041028	name=Gene of unknown function	3875037
ch07	14716458	14717722	14717090	ID=PGSC0003DMG400045487	name=Conserved gene of unknown function	3880483
ch07	14784238	14784552	14784395	ID=PGSC0003DMG400005087	name=Gene of unknown function	3947788
ch07	14816278	14818985	1.48176e+07	ID=PGSC0003DMG400046049	name='chromo' domain containing protein	3.98102e+06
ch07	6824808	6828625	6.82672e+06	ID=PGSC0003DMG400035888	name=Type-b response regulator	4.00989e+06
ch07	6804297	6804982	6.80464e+06	ID=PGSC0003DMG400028755	name=Pit1 protein	4.03197e+06
ch07	14877304	14877762	14877533	ID=PGSC0003DMG400043283	name=Gene of unknown function	4040926
ch07	14877865	14878776	1.48783e+07	ID=PGSC0003DMG400041175	name=Integrase core domain containing protein	4.04171e+06
ch07	6785966	6786464	6786215	ID=PGSC0003DMG400036806	name=Pit1 protein	4050392
ch07	14920143	14924325	14922234	ID=PGSC0003DMG400005088	name=Transcription factor	4085627
ch07	14926796	14930388	14928592	ID=PGSC0003DMG400005089	name=Gene of unknown function	4091985
ch07	6710751	6720362	6.71556e+06	ID=PGSC0003DMG400028754	name=Conserved gene of unknown function	4.12105e+06
ch07	6713250	6714145	6.7137e+06	ID=PGSC0003DMG400028762	name=Gene of unknown function	4.12291e+06
ch07	14965843	14967204	1.49665e+07	ID=PGSC0003DMG400005093	name=Gene of unknown function	4.12992e+06
ch07	6695983	6706215	6701099	ID=PGSC0003DMG400028753	name=Methionyl-tRNA synthetase	4135508
ch07	14976115	14976483	14976299	ID=PGSC0003DMG400038327	name=Gene of unknown function	4139692
ch07	6661573	6668071	6664822	ID=PGSC0003DMG400028752	name=Conserved gene of unknown function	4171785
ch07	6655777	6656487	6656132	ID=PGSC0003DMG400028751	name=Conserved gene of unknown function	4180475
ch07	6642720	6643562	6643141	ID=PGSC0003DMG400028750	name=Conserved gene of unknown function	4193466
ch07	15029926	15031238	15030582	ID=PGSC0003DMG400036024	name='chromo' domain containing protein	4193975
ch07	6630039	6637798	6.63392e+06	ID=PGSC0003DMG400028739	name=Oxysterol-binding protein	4.20269e+06
ch07	15071171	15071599	15071385	ID=PGSC0003DMG400005094	name=Gene of unknown function	4234778
ch07	15072595	15073220	1.50729e+07	ID=PGSC0003DMG400005090	name=Gene of unknown function	4.2363e+06
ch07	15079415	15081741	15080578	ID=PGSC0003DMG400036750	name=Gene of unknown function	4243971
ch07	6579657	6584936	6.5823e+06	ID=PGSC0003DMG400028738	name=Conserved gene of unknown function	4.25431e+06
ch07	6567415	6578903	6573159	ID=PGSC0003DMG400028737	name=Subtilase family protein	4263448
ch07	15118948	15127680	15123314	ID=PGSC0003DMG400041922	name=Gag-pol protein	4286707
ch07	6528056	6533604	6530830	ID=PGSC0003DMG400028748	name=Pentatricopeptide repeat-containing protein	4305777
ch07	6514084	6527705	6.52089e+06	ID=PGSC0003DMG400028736	name=PRP8 protein	4.31571e+06
ch07	6504018	6509430	6506724	ID=PGSC0003DMG400028735	name=Transducin family protein	4329883
ch07	6495722	6503405	6.49956e+06	ID=PGSC0003DMG400028747	name=UDP-3-O-[3-hydroxymyristoyl] N-acetylglucosamine deacetylase	4.33704e+06
ch07	15176598	15177149	1.51769e+07	ID=PGSC0003DMG400043595	name=Mads box protein	4.34027e+06
ch07	6491487	6492353	6491920	ID=PGSC0003DMG400046650	name=Isoform 2 of F-box protein	4344687
ch07	15187289	15187615	15187452	ID=PGSC0003DMG400044098	name=Gag-pol polyprotein	4350845
ch07	6465419	6470659	6468039	ID=PGSC0003DMG400028746	name=Microtubule-associated protein	4368568
ch07	6463784	6464740	6464262	ID=PGSC0003DMG400028734	name=Gene of unknown function	4372345
ch07	6461211	6463185	6462198	ID=PGSC0003DMG400028733	name=Serine/threonine-protein kinase cdk9	4374409
ch07	6452192	6452624	6452408	ID=PGSC0003DMG400028759	name=Conserved gene of unknown function	4384199
ch07	15222059	15223199	15222629	ID=PGSC0003DMG400039361	name=Gag-pol polyprotein	4386022
ch07	6439498	6446776	6443137	ID=PGSC0003DMG400028732	name=Conserved gene of unknown function	4393470
ch07	6434710	6436546	6435628	ID=PGSC0003DMG400028744	name=Small molecular heat shock protein 10	4400979
ch07	6427643	6428056	6.42785e+06	ID=PGSC0003DMG402028731	name=Gene of unknown function	4.40876e+06
ch07	6426134	6427612	6426873	ID=PGSC0003DMG401028731	name=Serine/threonine-protein kinase cdk9	4409734
ch07	6422986	6424938	6423962	ID=PGSC0003DMG400028730	name=CRK1 protein	4412645
ch07	6413700	6421867	6.41778e+06	ID=PGSC0003DMG400028729	name=Conserved gene of unknown function	4.41882e+06
ch07	6407537	6411506	6.40952e+06	ID=PGSC0003DMG400028728	name=Conserved gene of unknown function	4.42709e+06
ch07	15281888	15282466	15282177	ID=PGSC0003DMG400041328	name=Gene of unknown function	4445570
ch07	15288043	15288653	15288348	ID=PGSC0003DMG400034798	name=Gene of unknown function	4451741
ch07	15290095	15290547	15290321	ID=PGSC0003DMG400036582	name=Gene of unknown function	4453714
ch07	15292096	15293091	1.52926e+07	ID=PGSC0003DMG400038459	name=Gene of unknown function	4.45599e+06
ch07	6373467	6374738	6.3741e+06	ID=PGSC0003DMG402028727	name=Gene of unknown function	4.4625e+06
ch07	6372413	6373404	6.37291e+06	ID=PGSC0003DMG400028758	name=Gene of unknown function	4.4637e+06
ch07	6367641	6374739	6371190	ID=PGSC0003DMG401028727	name=Conserved gene of unknown function	4465417
ch07	6363686	6365559	6.36462e+06	ID=PGSC0003DMG400028742	name=Serine/threonine-protein kinase cdk9	4.47198e+06
ch07	15314004	15314330	15314167	ID=PGSC0003DMG400005091	name=40S ribosomal protein S2	4477560
ch07	6350884	6352709	6.3518e+06	ID=PGSC0003DMG400028741	name=Serine/threonine-protein kinase	4.48481e+06
ch07	6348653	6349123	6348888	ID=PGSC0003DMG400028757	name=Fiber protein Fb15	4487719
ch07	6332820	6341459	6.33714e+06	ID=PGSC0003DMG400028740	name=Conserved gene of unknown function	4.49947e+06
ch07	6329595	6332125	6330860	ID=PGSC0003DMG400028726	name=Transcription factor BTF3	4505747
ch07	6324551	6325361	6324956	ID=PGSC0003DMG400028725	name=Major latex	4511651
ch07	6307110	6307516	6307313	ID=PGSC0003DMG400028756	name=Gene of unknown function	4529294
ch07	6303841	6304864	6.30435e+06	ID=PGSC0003DMG400028724	name=Major latex	4.53225e+06
ch07	15368298	15375625	1.5372e+07	ID=PGSC0003DMG400044118	name=Gene of unknown function	4.53535e+06
ch07	15396842	15399962	15398402	ID=PGSC0003DMG400035313	name='chromo' domain containing protein	4561795
ch07	15411148	15412817	1.5412e+07	ID=PGSC0003DMG400005096	name=Gene of unknown function	4.57538e+06
ch07	6258626	6259653	6.25914e+06	ID=PGSC0003DMG400012100	name=Major latex	4.57747e+06
ch07	15418595	15424424	1.54215e+07	ID=PGSC0003DMG400005092	name=F-box and wd40 domain protein	4.5849e+06
ch07	15434727	15439152	1.54369e+07	ID=PGSC0003DMG400005097	name=Thioredoxin peroxidase 1	4.60033e+06
ch07	15473589	15478234	1.54759e+07	ID=PGSC0003DMG400043828	name=Gene of unknown function	4.6393e+06
ch07	6153235	6153786	6.15351e+06	ID=PGSC0003DMG400036920	name=Gene of unknown function	4.6831e+06
ch07	15551274	15556327	1.55538e+07	ID=PGSC0003DMG401008657	name=Replication factor A	4.71719e+06
ch07	6117037	6117358	6.1172e+06	ID=PGSC0003DMG400022996	name=Gene of unknown function	4.71941e+06
ch07	15556448	15557489	1.5557e+07	ID=PGSC0003DMG402008657	name=Gene of unknown function	4.72036e+06
ch07	15558345	15560220	1.55593e+07	ID=PGSC0003DMG400008658	name=Conserved gene of unknown function	4.72268e+06
ch07	6097872	6098996	6098434	ID=PGSC0003DMG400039637	name=EIX receptor 2	4738173
ch07	15586077	15586709	15586393	ID=PGSC0003DMG400034440	name=Gene of unknown function	4749786
ch07	6070048	6079747	6.0749e+06	ID=PGSC0003DMG400022975	name=DEAD-box ATP-dependent RNA helicase 1	4.76171e+06
ch07	6068691	6069665	6069178	ID=PGSC0003DMG401022984	name=Conserved gene of unknown function	4767429
ch07	6065807	6066459	6066133	ID=PGSC0003DMG402022984	name=Conserved gene of unknown function	4770474
ch07	6052355	6062667	6057511	ID=PGSC0003DMG400022976	name=CMP/dCMP deaminase, zinc-binding	4779096
ch07	6055647	6056056	6.05585e+06	ID=PGSC0003DMG400022998	name=Gene of unknown function	4.78076e+06
ch07	15622851	15623222	1.5623e+07	ID=PGSC0003DMG400045246	name=Gag-pol polyprotein	4.78643e+06
ch07	6045945	6049162	6.04755e+06	ID=PGSC0003DMG400022985	name=30S ribosomal protein S16	4.78905e+06
ch07	15632583	15635460	1.5634e+07	ID=PGSC0003DMG400008659	name=ROP	4.79741e+06
ch07	6022924	6027267	6.0251e+06	ID=PGSC0003DMG400022986	name=Conserved gene of unknown function	4.81151e+06
ch07	15650733	15651416	1.56511e+07	ID=PGSC0003DMG400035196	name=Gag-pol protein	4.81447e+06
ch07	15667046	15667780	15667413	ID=PGSC0003DMG400008662	name=Gene of unknown function	4830806
ch07	15664099	15672192	1.56681e+07	ID=PGSC0003DMG400008660	name=Sugar transporter	4.83154e+06
ch07	5980881	5983207	5982044	ID=PGSC0003DMG400022977	name=EIX receptor 1	4854563
ch07	15698933	15700171	15699552	ID=PGSC0003DMG400043781	name=Gene of unknown function	4862945
ch07	5970176	5974281	5.97223e+06	ID=PGSC0003DMG400022987	name=ATP-dependent transporter	4.86438e+06
ch07	15708000	15710882	15709441	ID=PGSC0003DMG400042692	name=Ubiquitin carboxyl-terminal hydrolase	4872834
ch07	5959208	5962270	5960739	ID=PGSC0003DMG400022978	name=EIX receptor 1	4875868
ch07	5955778	5958976	5957377	ID=PGSC0003DMG400022988	name=EIX receptor 1	4879230
ch07	5945610	5951000	5948305	ID=PGSC0003DMG400022979	name=Inactive purple acid phosphatase 27	4888302
ch07	5942809	5945157	5943983	ID=PGSC0003DMG400022989	name=N protein	4892624
ch07	5931602	5939165	5.93538e+06	ID=PGSC0003DMG400022980	name=Hydrolase	4.90122e+06
ch07	5927689	5930866	5.92928e+06	ID=PGSC0003DMG400022990	name=EIX receptor 1	4.90733e+06
ch07	15764858	15765208	15765033	ID=PGSC0003DMG400041752	name=Integrase core domain containing protein	4928426
ch07	15767099	15771296	1.57692e+07	ID=PGSC0003DMG400044756	name=Gene of unknown function	4.93259e+06
ch07	15773261	15774743	15774002	ID=PGSC0003DMG400045383	name=Gene of unknown function	4937395
ch07	5894645	5896770	5.89571e+06	ID=PGSC0003DMG400022981	name=SET domain protein	4.9409e+06
ch07	15782444	15784581	1.57835e+07	ID=PGSC0003DMG400035903	name=Gag-pol polyprotein	4.94691e+06
