# Supplementary material for: Variation and genetic basis of mineral content in potato tubers and prospects for genomic selection
Source: Front Plant Sci. 2023 Dec 22;14:1301297. doi: 10.3389/fpls.2023.1301297 (PMC10766833; doi:10.3389/fpls.2023.1301297)
Supplement: Supplementary file 7 [file Table_6.xlsx]

## Sheet: Sheet1
Supplementary Table 6: Standardized (Z-score) selection index for mineral contents and weighted multi-trait selection index based on the priority 214 potato genotypes.
1 Weighted multi-trait index selection = (1) * Zi GEBV N + (1) * Zi GEBV P + (1) Zi GEBV K + (1) * Zi GEBV Ca + (1) * Zi GEBV Mg + (1) * Zi GEBV Na + (2) * Zi GEBV Zn + (2) * Zi GEBV Fe + (1) * Zi GEBV Cu + (1) * Zi GEBV Mn + (1) * Zi GEBV S + (1) * Zi GEBV B
The weight given to each trait is subjective and at the discretion of each breeder.
ZWMIS = Standardized (Z-score) weighted selection index
Genotype	N	P	K	Ca	Mg	Na	Zn	Fe	Cu	Mn	S	B	WMIS1	ZWMIS
AOTX95265-1Ru	-0.252242	-0.225687	-0.706662	1.82553	1.37623	1.59786	-1.0474	0.950733	-0.714234	1.10437	-0.444372	-0.362195	3.00528	0.39596
AOTX95265-4Ru	-0.30634	-0.285896	-0.748421	1.83543	1.36877	1.63817	-1.03801	0.927489	-0.705799	1.06959	-0.463266	-0.404515	2.77667	0.365839
ATX9130-1Ru	-0.653213	-0.582357	-1.12717	0.861771	0.913995	1.04504	0.635771	0.714261	1.64097	-0.875248	1.63491	1.44282	7.00158	0.922491
COTX10138-19P/Y	-1.19519	-0.321159	-0.0496517	-1.12112	-2.14816	-1.12109	-0.967142	-2.09737	-1.37109	-1.454	-1.47062	-0.42764	-16.8088	-2.21463
TX11461-2W	0.71582	0.165351	0.797116	-1.35993	-0.593309	-0.321679	0.0600488	-0.696573	-0.145625	-0.396958	0.305923	-1.37627	-3.48261	-0.45885
AOR07781-2	-1.35446	-2.21472	-1.77201	-0.361944	0.737303	0.298566	-1.70612	0.565823	-0.817496	-0.0133121	-1.07838	-0.505722	-9.36277	-1.23359
AORTX09037-1W/Y	0.181664	-0.577095	0.55244	-1.5253	-0.712461	-1.36655	-0.812583	-0.523113	0.369164	-1.01885	-0.111397	-0.466779	-7.34656	-0.967943
AOTX02136-1Ru	-1.01776	-0.238419	-1.07499	0.579003	1.62218	0.413971	-0.610508	0.952123	1.08917	1.17277	-0.653616	1.07027	3.64582	0.480354
AOTX03187-1Ru	-2.53472	-2.02026	-1.86458	-0.112829	-2.07309	-0.107386	-1.16735	0.59664	0.158233	-0.445575	-2.33253	-1.57002	-14.0442	-1.85038
AOTX05043-1Ru	-0.708916	-0.206365	-1.15378	0.427827	0.439643	0.322687	-0.41998	0.978646	-1.03957	0.987297	-0.473397	0.45594	0.1687	0.022227
AOTX91861-4R	1.4036	0.304288	0.864298	-1.07347	0.527882	-0.67411	1.60804	0.549503	0.427909	1.40288	1.14012	1.42667	10.0651	1.32613
AOTX93483-1R	2.03804	2.4573	0.919564	-0.080492	0.211473	0.350233	1.34576	0.147455	1.40065	-0.0910468	1.88294	1.92802	14.0031	1.84498
AOTX95295-3Ru	-0.254138	-0.234919	-0.702966	1.83029	1.3838	1.59142	-1.05959	0.947751	-0.722064	1.11979	-0.451203	-0.366033	2.9703	0.391351
AOTX95309-1W	0.252831	0.299241	1.45707	-0.754128	-0.520255	0.30854	0.413278	-1.13052	0.885971	-0.817702	0.944186	0.00274865	0.624026	0.0822183
AOTX95309-2W*	-0.696764	-1.19291	-1.32719	-1.12929	-0.059726	-0.0294983	-0.411183	-0.808632	-0.53667	1.21603	-1.08501	0.348339	-6.93232	-0.913365
AOTX96075-1Ru	-0.252691	-0.231241	-0.701056	1.82286	1.38225	1.59005	-1.048	0.94913	-0.697368	1.10985	-0.455438	-0.374612	2.99486	0.394587
AOTX96084-1Ru	-0.281233	-0.197173	-0.589593	1.70367	1.08575	1.43381	-1.07234	0.814648	-0.628417	0.91268	-0.50676	-0.250431	2.16691	0.285501
AOTX96208-1Ru	-0.2701	-0.202432	-0.627966	1.80435	1.22051	1.52934	-1.06903	0.908197	-0.613098	0.976876	-0.460407	-0.290249	2.74517	0.361688
AOTX96216-1Ru	-1.62858	-1.03885	-0.516012	0.758816	-0.0642493	1.07851	-0.828915	0.452906	-1.34529	-0.764223	0.575441	-0.226703	-3.92316	-0.516894
AOTX96216-2Ru	-1.55022	-0.911051	-0.457947	0.732322	-0.0966827	0.969633	-0.774716	0.381234	-1.26771	-0.733158	0.601463	-0.188141	-3.68846	-0.485972
AOTX97213-1Ru	-2.27207	-1.55691	-0.574659	1.62433	0.414291	1.27588	-2.19567	0.985113	-1.0347	-1.00514	-1.00725	-0.458901	-7.01626	-0.924425
AOTX98096-1Ru*	-0.256289	-0.223237	-0.700463	1.82842	1.35963	1.58546	-1.04962	0.940806	-0.697915	1.09512	-0.457921	-0.379076	2.93609	0.386843
AOTX98137-1Ru	-0.257127	-0.239848	-0.712388	1.82707	1.37962	1.59497	-1.06318	0.948687	-0.721818	1.10887	-0.454257	-0.371695	2.92441	0.385304
AOTX98152-3Ru	-1.45024	-1.02613	-2.29476	1.07044	-0.643941	0.597131	-0.908195	0.52385	-1.32567	-1.44438	-1.67342	-1.49669	-10.4563	-1.37767
AOTX98202-1Ru	-0.150503	0.166947	-1.17625	0.695331	0.863949	1.66028	-0.154101	1.70008	1.23048	0.0303038	-0.17712	1.10575	7.34112	0.967227
Atlantic	-1.32795	-2.09373	0.133286	-0.666897	-3.23261	-0.839622	-1.02598	-0.840506	-1.26963	-2.39048	-1.85272	-0.771888	-18.0452	-2.37754
ATTX00289-4W	0.681462	-1.24587	-1.04708	-0.0847591	-0.907159	-1.01656	-0.769046	-0.452394	0.651288	-1.44581	0.10266	-0.826723	-7.58144	-0.99889
ATTX00289-5R/Y	1.14339	1.10602	1.37926	-0.0279547	1.27743	-0.437542	0.489897	-0.105814	1.00576	0.414885	1.7237	0.928323	9.28145	1.22287
ATTX00289-6Y/Y	-0.231278	-0.187873	-0.0933843	-0.508997	0.307228	-1.6776	-1.14651	-1.84497	-0.686841	-0.78996	-0.696904	-0.66595	-11.2145	-1.47757
ATTX01178-1R	2.34637	1.43014	0.703221	-0.146242	1.31695	0.122363	1.80079	0.558756	0.863384	0.602933	2.19289	0.842278	14.9934	1.97545
ATTX01180-1R/Y	0.405741	0.888249	0.753557	-0.896192	-0.858312	-0.090475	-0.442601	-1.49644	-1.23129	-0.486976	0.0816619	-0.0592273	-5.37134	-0.707698
ATTX03516-2R	0.382557	-0.40159	-0.0489182	-0.69939	-0.214246	-0.590842	0.433976	0.121169	-1.30086	0.772478	0.885986	1.213	1.10847	0.146046
ATTX05175s-1R/Y	-1.13232	0.954756	0.870892	-0.510252	-1.22756	-0.932221	1.27258	-1.30966	-0.0413594	-0.669208	0.138556	0.870078	-1.75281	-0.230941
ATTX05186-2R	1.37036	1.75321	0.801668	0.0240481	-0.02292	-0.0736444	1.0075	0.11836	1.42977	-0.0072616	2.57338	2.08482	12.1852	1.60545
ATTX06246-1R	0.39905	0.0671131	-0.293616	-0.856761	0.416796	-0.997288	0.141678	0.522245	-0.673311	0.25683	0.976482	0.564415	1.18756	0.156466
ATTX07042-3W	-0.551091	-1.89092	-0.265738	0.0369738	-1.25097	-0.828678	-1.12045	-0.713887	-1.05256	-1.2866	-1.01067	-0.77735	-12.5463	-1.65303
ATTX10265-4R/Y	-0.0693467	1.04586	1.06533	-0.593187	-0.450423	-1.12145	-0.733467	-1.74624	-0.250637	-0.48821	0.093959	0.299278	-5.42824	-0.715196
ATTX88481-1P/W	0.815176	0.43089	-0.5311	-1.40212	-0.792066	-0.633589	1.38378	0.3702	0.76102	-0.055122	0.287329	-0.957195	1.4312	0.188567
ATTX88654-2P/Y	-0.859138	0.912459	1.42154	-0.796968	-1.93454	-0.227636	0.431719	-1.3951	-0.0718901	-1.20872	-0.754889	0.557284	-4.88926	-0.644183
ATTX95490-2W	1.91782	1.7867	2.32122	0.109752	0.0917505	-1.10006	0.806124	0.498402	1.85783	-0.495926	1.64588	-0.0319675	10.712	1.41136
ATTX961014-1AR/Y	-0.798078	-1.19905	-1.37307	-1.16828	-0.0606239	0.0632636	-0.467204	-0.989178	-0.696886	1.14948	-1.19117	0.12719	-8.05999	-1.06194
ATTX961014-1Br/Y	-0.696231	-1.18907	-1.32349	-1.13508	-0.0667039	-0.0270484	-0.40664	-0.816572	-0.540663	1.20667	-1.08283	0.34759	-6.95328	-0.916127
Sierra RoseTM	-0.694984	-1.19657	-1.32743	-1.14029	-0.0718516	-0.0328189	-0.419963	-0.815019	-0.559737	1.20969	-1.08957	0.332696	-7.04083	-0.927662
ATTX961014-1R/Y Chimera	1.42004	0.725499	0.246542	-0.809284	-0.770117	-0.547787	2.16585	-0.321834	0.127723	-1.05395	1.32234	0.757121	5.10614	0.672758
ATTX98444s-16R/Y	0.505739	0.74939	-0.0514023	-1.17692	-0.37833	-0.348776	-0.766142	-1.49993	-0.878571	0.192362	0.43099	0.665574	-4.82209	-0.635333
ATTX98448-6R/Y	1.14658	1.11713	1.37713	-0.0262573	1.26409	-0.44168	0.507277	-0.0897682	1.01668	0.401336	1.72815	0.930269	9.34845	1.2317
ATTX98453-11Br	1.67912	1.64318	1.24487	0.109485	0.0442024	0.37612	1.7273	1.0633	0.8017	0.0995438	1.21003	1.68321	14.4727	1.90684
ATTX98453-3R	1.59404	1.7563	1.13758	0.264589	-0.145175	0.0237738	1.94282	0.74977	1.51145	-0.446399	0.722046	0.769236	12.5726	1.6565
ATTX98453-6R	1.38042	0.849887	0.392043	0.075986	-0.467231	0.437078	2.07267	1.273	0.954994	0.135951	1.19473	0.555906	12.2011	1.60755
ATTX98462s-3R/Y	-0.706905	-1.20073	-1.32228	-1.12563	-0.0614395	-0.0227646	-0.410772	-0.804759	-0.562369	1.2089	-1.08761	0.356487	-6.95541	-0.916408
ATTX98465-1R/Y	0.217268	1.01278	0.629563	0.372478	-1.03556	-0.457155	1.29139	-1.76201	0.47126	0.0317165	-0.285067	1.21158	1.22761	0.161744
ATTX98466-5R/WR	1.42628	0.727656	0.25388	-0.815215	-0.756892	-0.547642	2.17663	-0.317402	0.133103	-1.04496	1.34228	0.73974	5.17668	0.682051
ATTX98468-5Ru/Y*	-0.802697	-1.1423	-1.65198	0.785752	-0.30962	1.44945	-1.2635	0.99243	0.997529	-0.480291	-0.63931	-1.0527	-3.38832	-0.446428
ATTX98491-4Yrdspl/Y	-0.846926	1.35403	1.28598	-0.0168368	-0.809469	0.496338	0.0508366	-1.67799	-0.209451	-0.18188	-0.590125	0.367092	-2.40555	-0.316943
ATTX98493-1AR	0.927074	0.72286	0.112119	-1.21719	-0.338583	-0.521449	-0.97216	-1.88617	-0.362637	1.16985	-0.0016241	0.347632	-4.87862	-0.642781
ATTX98493-2P/P	0.0316023	-0.642922	-0.290482	-1.10144	-0.810524	-1.9104	-0.100024	0.0234533	-0.367418	-0.577083	-0.656996	-3.00506	-9.48387	-1.24954
ATTX98500-2P/Y	-0.742342	1.57036	1.75664	-0.489582	-0.919985	-0.689761	1.03757	-1.30286	-0.449955	-0.729364	0.0860155	-0.386507	-1.52507	-0.200935
ATTX98500-3P/Y	-0.28188	1.90804	1.7147	-0.367338	0.0785371	-0.427666	2.15065	-1.02244	0.565307	0.177959	0.340886	1.32029	7.28524	0.959865
ATTX98510-1R/Y	0.69666	0.275367	0.193906	-1.80203	-0.495487	-1.43576	-1.18769	-1.88733	-0.508834	-0.103484	0.236886	-0.208866	-9.30168	-1.22554
ATTX98514-1R/Y	0.443069	0.925696	0.21611	-0.73755	-0.703482	-0.873746	-0.184355	-1.5018	-0.928924	-0.442438	-0.0380731	-0.189029	-5.70069	-0.751092
ATTX98518-5P/Y	0.911635	0.615798	1.41785	-0.490611	1.15104	-0.44441	0.177318	-0.794039	-0.208859	1.57633	0.430925	-0.172239	3.55401	0.468258
ATTX99325-1P	0.791163	0.32202	-0.585748	-1.37895	-0.681391	-0.563277	1.36119	0.397307	0.776969	0.000519274	0.244139	-0.918595	1.52384	0.200773
ATX02263-1R/Y	0.965912	1.43843	0.97534	-0.596932	-0.569229	-0.161718	0.512852	-0.404855	0.112299	1.10559	0.590917	0.601409	4.67802	0.616351
ATX03496-3Y/Y	-0.365875	0.554308	-0.238001	0.31533	-0.587327	-1.25321	0.0103689	-1.40165	0.299062	-0.346822	-1.26001	0.165792	-5.49932	-0.724561
ATX03564-1Y/Y	-0.393698	0.540913	-0.246159	0.31189	-0.624139	-1.2577	0.00905025	-1.39871	0.31601	-0.358685	-1.28521	0.174735	-5.60137	-0.738006
ATX05186-1R	1.27954	1.76025	0.852629	-0.0227699	0.00953546	-0.188007	1.0933	0.0780025	1.24935	0.0118341	2.5673	2.09673	11.959	1.57565
ATX05202s-3W/Y	0.0766299	1.49109	0.821536	0.393876	0.645356	-0.542888	1.53666	-1.15197	2.67923	-0.554772	1.79255	1.16491	8.73691	1.15113
ATX06264s-4R/Y	-0.243965	1.17717	0.964472	-0.355575	-0.344709	-0.453671	1.60761	-0.741452	0.284005	-0.744587	1.42026	0.987841	4.42356	0.582824
ATX07305S-1Y/Y	-0.702796	0.232637	0.0649242	0.481627	-1.42359	-0.0676894	-0.0277809	-0.858004	2.45668	-0.91045	-0.052328	1.44766	-0.244896	-0.0322662
ATX08181-5Y/Y	-0.428428	0.752736	0.281989	0.63082	0.626318	0.0107771	0.357768	-0.906764	1.08337	-0.694701	-0.187804	0.979101	1.95619	0.257737
ATX84378-6Ru	-1.9074	-1.15679	-0.451259	0.583457	-0.327363	1.20059	-1.05976	0.538177	-1.56739	-0.703565	0.390191	-0.24678	-5.22947	-0.689007
ATX84706-2Ru	-0.148037	-0.13227	-0.772507	0.0117846	-0.684095	-0.454089	0.592156	0.213628	0.191213	-0.628364	0.108657	-0.608833	-1.50497	-0.198287
ATX85404-8W	0.263855	0.316756	1.46411	-0.741707	-0.510239	0.310462	0.431261	-1.12038	0.902355	-0.821013	0.963948	0.0116703	0.781962	0.103027
ATX87184-2Ru	0.145843	0.661889	0.250968	0.842479	0.104229	2.10825	0.0898691	1.07183	2.1384	-0.711632	1.25885	1.24448	10.3672	1.36592
Reveille Russet	-0.355949	-0.377712	-0.928792	1.03091	0.984433	1.86747	-0.00425827	1.33532	0.622398	0.105655	-0.223922	0.793631	6.18024	0.814275
ATX9117-1Ru	-0.505163	-0.424681	0.428597	-0.0504114	0.213931	0.499871	-1.06651	-0.234656	-0.245345	-0.779259	-0.114337	0.883716	-2.69541	-0.355132
ATX91322-2Y/Y	-2.10019	1.23217	0.461377	1.26562	-2.86805	0.832713	1.34226	-3.28814	-1.5943	-1.33731	-2.5267	1.72889	-8.79753	-1.15912
ATX9202-3Ru	-0.663205	-0.819722	-1.17645	0.969319	0.332223	0.747393	-1.15485	0.893462	0.573739	-0.0221108	-1.14075	0.315237	-1.4071	-0.185392
ATX9312-1Ru	-1.96388	-0.0905375	-0.176716	1.69116	1.00726	1.529	-0.357942	1.22099	0.719825	0.144074	-0.972689	0.153498	3.76709	0.496331
ATX9332-8Ru	-2.13004	-0.248921	-0.59351	1.2043	-0.547567	0.818034	-1.32869	0.310085	-0.876849	-0.223045	-2.34899	-0.582338	-7.56614	-0.996874
ATTX96746-1R*	0.825269	0.0873446	-0.399202	-0.170006	0.418018	0.3899	2.348	0.686946	-0.486747	-0.561728	1.20843	1.19701	8.57818	1.13021
ATX97147-4Ru	-1.38136	-0.455643	-0.908331	1.63862	0.419408	1.46716	-1.20419	0.634238	1.01519	-0.63699	0.436032	-0.0162919	0.43789	0.057694
ATX99013-1Ru	-0.251471	-0.239944	-0.70299	1.82514	1.38493	1.5956	-1.05598	0.950333	-0.719946	1.11373	-0.447527	-0.369783	2.97644	0.39216
BTX1544-2W/Y	0.563606	0.184892	0.139879	-0.0458844	1.56146	-1.47061	0.558996	-1.11554	1.01252	0.86232	0.636762	-0.529677	1.80219	0.237447
BTX1749-1W/Y	-0.0286814	-1.96307	-1.47219	-0.93815	-1.18998	-1.51613	-0.0873801	-0.806586	0.692598	-1.10117	-0.597931	-0.875832	-10.7785	-1.42011
BTX2103-1R/Y	1.28204	1.22168	0.347978	-0.798534	-0.21136	-0.514513	0.464041	-1.14751	0.56228	1.00564	0.614806	1.10897	3.25204	0.428472
BTX2332-1R	1.06952	1.39294	1.53652	-0.117805	0.821935	-0.31569	2.74836	0.784333	0.839206	1.46772	1.14405	1.13133	16.0351	2.1127
CO112-F2-2P/P	-1.11702	0.456862	0.807662	1.48625	-0.0514644	0.111957	-0.514431	0.265282	0.63184	-0.14074	-1.31911	-1.91715	-1.54921	-0.204116
COTX00104-6R	1.16869	1.53329	1.13281	0.32607	1.71988	0.158682	1.93059	0.742341	0.446736	1.35338	2.32202	1.68466	17.1921	2.26514
COTX00104-7R	0.17739	1.70264	1.50696	0.402589	0.437066	0.297968	0.476704	0.635849	0.529227	0.844487	1.28133	1.09737	10.5021	1.3837
COTX01403-4R/Y	0.797301	0.0190216	0.559305	-1.11673	0.180682	-1.21625	-0.0428709	-0.688413	-0.87455	-0.382807	0.572485	0.361646	-2.56246	-0.337617
COTX02172-1R	0.678655	-0.0443741	-0.389681	-0.618566	-0.284248	-0.0339541	0.512817	0.395368	-1.34891	1.1231	0.665959	0.950756	2.51511	0.331377
COTX02293-4R	0.998908	0.0594213	0.487906	-0.61632	0.529789	-0.613541	0.359421	0.181998	-0.770846	1.48716	2.1747	1.01638	5.8364	0.768973
COTX03079-1W/W	-0.668558	-0.845989	-1.81623	-0.630442	-1.36837	-1.89976	-0.618258	-1.37282	0.294703	-1.72802	-1.4709	-0.532946	-14.6487	-1.93003
COTX03134-1Y/W	-1.41304	-0.986958	-0.167898	-0.088543	-1.57656	-0.32822	-1.0076	-1.21462	-0.838734	-1.22559	-1.05812	-0.499049	-12.6271	-1.66369
COTX03187-1W	-2.54599	-2.09044	-1.90378	-0.177666	-2.05001	-0.0728421	-1.17056	0.610866	0.290641	-0.38827	-2.31588	-1.67209	-14.0457	-1.85059
COTX04015-3W/Y	-0.55767	0.0980707	0.0882431	0.146536	-1.39829	-0.773132	-0.463692	-1.2896	-1.42535	-1.35111	-0.460287	-0.495154	-9.63473	-1.26942
COTX04050s-1P/P	-0.0373088	-0.160617	-0.45305	-0.560711	-1.53681	-1.56183	0.53881	0.443473	0.443334	-1.49207	0.448108	-2.43507	-5.38145	-0.709031
COTX04193s-2R/Y	0.460152	-0.00756785	-0.103586	-0.922827	-0.105098	-0.794617	-0.539722	-1.61081	-1.19295	0.285575	0.225034	1.09125	-5.36571	-0.706957
COTX04303-3Ru/Y*	-0.25205	-0.239549	-0.711029	1.82801	1.37856	1.59723	-1.05668	0.950315	-0.721913	1.10962	-0.448102	-0.370785	2.95726	0.389632
COTX05095-2Ru/Y	-1.38966	-2.4634	-1.75363	0.0127937	-0.0680184	0.710115	-2.33919	-0.0835806	-0.908553	0.776003	-1.26006	-0.252705	-11.4427	-1.50762
COTX05211-4R	1.0386	0.830963	0.602328	0.0233815	0.277317	0.539446	0.58642	0.875202	-0.422044	0.984479	-0.0207234	0.938376	7.71537	1.01654
COTX05211-5R	1.02579	0.81795	0.598748	0.019878	0.266962	0.547611	0.576353	0.872459	-0.437189	0.980028	-0.036636	0.929998	7.61076	1.00275
COTX05211-7R	0.619252	0.283191	-0.218284	-0.537365	-0.255694	-0.502071	0.16136	0.801062	-0.587434	1.36724	-0.492682	0.99451	2.5955	0.34197
COTX05249-3W/Y	0.842026	1.19119	-0.0556445	-0.0198595	0.353716	-0.388827	0.370072	-1.23936	0.74693	1.33063	1.16136	0.634229	4.05718	0.534552
COTX05261-1R/Y	0.702172	0.151404	-0.27773	-1.21455	0.142119	-0.511638	0.189455	0.0712202	-0.989732	1.55783	-0.493282	0.555434	0.143372	0.0188899
COTX08039-1P/P*	0.982679	-0.0174777	-0.339007	-0.780462	1.24849	-0.69308	-0.371456	0.34343	0.723717	0.945126	0.791212	0.195775	3.00092	0.395385
COTX08063-2Ru	-2.37278	-1.60459	-1.86147	0.526398	-0.813729	1.21959	-1.46755	0.319129	-0.3152	-2.67022	-1.61968	-0.952485	-12.761	-1.68132
COTX08121-1Ru	0.475227	0.406785	-1.13929	0.62305	1.3561	1.29263	0.0281651	0.79896	0.464832	0.271761	-0.195114	0.387066	5.5973	0.737471
COTX08121-4Ru	0.469545	0.113642	-1.21936	0.465947	-0.135618	1.11412	0.0555499	0.787416	1.27358	-1.14403	-0.470784	-0.1984	1.95458	0.257525
COTX08258-6Ru	-0.764363	-1.05766	-1.32652	-0.0161232	0.220818	1.50093	-0.182317	1.08158	0.947125	-0.778495	-0.22577	0.441098	0.739562	0.0974407
COTX08322-10Ru	-0.238094	-0.991937	-1.68344	0.65438	-0.128812	2.10283	-0.617084	0.644739	-0.0302134	-0.785313	-0.906908	0.171368	-1.78083	-0.234632
COTX08365F-3P/P	1.34439	-0.149	0.974395	0.852512	0.823905	-0.134008	0.619266	0.473266	-0.870662	1.86504	1.12969	-0.193952	7.82737	1.03129
COTX09022-3RuRE/Y	-0.909279	-0.747492	-1.46003	0.230996	0.980053	0.60354	0.53271	-0.426855	0.347384	-0.877553	-0.124529	-0.384736	-2.12993	-0.280629
COTX09052-1Ru	-1.5539	-2.14281	-1.1577	0.623209	-0.0486207	1.01116	-1.43314	0.378038	1.32652	-0.983312	-0.730463	0.138301	-5.62781	-0.74149
COTX09052-2Ru	-1.56713	-2.14048	-1.15793	0.621413	-0.0653764	1.01526	-1.4309	0.381348	1.3239	-1.01206	-0.735167	0.142064	-5.67462	-0.747658
COTX09089-1Ru	-1.3772	-2.36347	-0.42396	-0.231955	-1.26502	0.91492	-1.14485	-0.627485	-0.613868	-0.956319	-1.07067	0.573836	-10.3584	-1.36476
COTX10012-1Wrdspl/Y	0.0748335	-0.32718	-0.392781	-0.806034	-0.30765	-1.12467	0.417189	-1.84436	0.14177	0.347028	0.889838	-0.688602	-5.04779	-0.66507
COTX10073s-1W	0.517182	-0.174548	0.410832	-0.309741	0.733141	-0.70729	0.159071	-0.647187	-0.0483538	0.776802	0.0781148	0.524034	0.823941	0.108558
COTX10080-2Ru	-1.69895	-0.193814	0.0317479	2.01708	-0.172046	0.982078	-0.231039	0.519268	1.15759	-0.0620983	-1.5195	0.603901	1.72243	0.226938
COTX10118-1Wre/Y	-0.772918	0.475987	0.373961	0.323679	-0.278459	0.178429	-0.568087	-2.23291	0.134843	-0.173018	0.112261	0.636831	-4.5904	-0.604806
COTX10118-4Wpe/Y	-1.8291	0.203046	0.221916	-0.125145	-1.85853	-0.795588	-0.287796	-2.7031	-0.267478	-0.656313	-1.28339	0.0576697	-12.3147	-1.62252
COTX10138-15Wpe/Y	-0.950875	-0.44249	0.642751	-0.496018	-0.433487	0.0488405	0.158546	-1.66032	-0.611072	-0.0525196	-0.0973078	0.704663	-4.69106	-0.618069
COTX10138s-7Wpe/Y	-0.544343	-0.826318	-0.359257	-0.590085	-0.0537608	-0.129155	-0.0417698	-1.58213	-1.43696	0.90934	-0.471076	0.837658	-5.91176	-0.778902
COTX10226-1Wpe/Y	-0.319083	-0.418771	0.498959	0.107984	0.301493	-0.698571	1.08289	-2.44911	-1.43955	0.14755	-0.0891933	0.501141	-4.14048	-0.545528
COTX13215-2Ru	-0.175791	0.0742421	-0.438171	0.312952	0.0188033	1.08531	-0.166144	0.835277	1.08947	-0.560186	0.409404	0.3027	3.457	0.455476
COTX87601-2Ru	-0.2883	0.589711	0.207764	1.01053	1.24084	1.34416	-0.0509458	1.04286	-0.0362459	1.3713	-0.61016	0.289694	7.10313	0.93587
COTX89044-1Ru	0.632363	-0.233762	-0.970102	0.172684	-0.908489	0.0438554	0.383882	0.300483	1.15678	-0.172157	-0.324563	-0.712037	0.0533011	0.00702267
COTX90046-1W	-0.270895	-0.265167	0.685141	-1.09497	-1.04648	-0.623482	0.369579	1.1945	0.594737	-1.07482	-1.24294	-0.750486	-1.96121	-0.258399
COTX90046-5W	-0.643811	-0.584331	-0.0528494	-0.783817	-1.7871	0.43853	-0.588512	0.318099	0.829587	-2.0042	-1.39638	-0.458139	-6.98334	-0.920087
COTX94216-1R	1.10762	0.58429	0.767749	-0.4011	0.689685	-0.35885	1.01404	-0.448095	0.0216175	0.911689	1.14587	0.569641	6.1701	0.81294
COTX94218-1R	1.65963	2.31675	2.36247	-0.292182	0.776174	0.135974	1.68671	0.734892	1.7085	0.570514	1.76119	1.73747	17.5797	2.31621
JTTX75/2003EH-1Yre/Y	0.367051	0.0652893	-0.161847	0.343889	0.506549	0.516905	-0.999588	-0.200552	-1.27851	1.39375	-0.269899	0.311274	-0.605832	-0.0798212
Krantz	-0.638378	-1.29119	-1.42335	0.246196	-0.648282	-0.88129	-0.420491	-0.762228	0.147354	-0.141298	-1.09725	-0.0055786	-8.0985	-1.06702
MWTX2609-2Ru	-1.38972	-0.301453	-0.220701	1.44435	-0.631897	1.6119	-0.662463	1.53386	0.0181948	-1.67572	-0.145112	0.944989	1.39762	0.184143
MWTX2609-4Ru	-1.39189	-0.278717	-0.212584	1.45719	-0.64222	1.62804	-0.645959	1.53961	0.0364133	-1.67913	-0.144882	0.967342	1.52685	0.20117
MWTX548-2Ru	-1.37873	-0.297024	-0.224206	1.4481	-0.669442	1.61279	-0.637657	1.52558	-0.006119	-1.68391	-0.164273	0.941581	1.35462	0.178477
NDTX050169-1R	2.84912	2.89146	2.49568	0.521111	3.22482	1.01211	2.57905	2.23981	0.897453	1.64629	3.35282	3.33837	31.867	4.19862
NDTX050184s-1R/Y	0.866023	1.91738	1.46949	0.916553	1.11118	0.0178743	1.03087	0.624567	1.71065	-0.260206	1.71759	2.00642	14.7838	1.94784
NDTX059759-3R/Y Pinto	0.146662	1.70229	1.63647	-0.181827	0.0475573	-0.73232	0.668805	-0.092103	0.994545	1.19876	0.171566	1.53402	7.67113	1.01071
NDTX059761-1R/R	0.541478	0.294243	0.89787	0.812226	0.0991286	-0.246431	0.635893	1.46107	0.320404	0.0155946	0.911766	0.0211725	7.86137	1.03577
NDTX059775-1W	0.087481	1.14411	0.628677	-0.396451	-0.611169	-0.928109	0.512555	-0.883401	0.831127	-0.254921	-0.0565935	0.374015	0.0764712	0.0100754
NDTX059828-2W	1.73882	0.503119	1.27429	-1.16801	0.446867	-0.970192	1.4266	0.632141	-0.922239	1.562	0.92038	-1.32176	6.18075	0.814342
NDTX059886S-1Y/Y	0.310618	-0.144017	-0.0728036	-0.520595	-0.0803134	-0.449982	0.177069	-0.588141	-0.512999	0.904184	0.0898776	-0.169855	-1.46803	-0.19342
NDTX060700C-1W	-0.286243	-1.88423	-0.74827	-1.79303	-1.41024	-1.49991	0.938743	-0.245799	0.323436	-0.481847	-0.614802	-2.38845	-9.3977	-1.23819
NDTX071109C-1W	0.32033	0.00123296	1.01316	-0.676468	-0.213887	-1.26019	0.281876	-0.264279	0.849551	0.135915	-0.0484296	-1.42702	-1.2706	-0.167408
NDTX071217CB-1W/Y	1.08601	-0.0720629	0.622488	-0.829176	1.10942	-1.32884	-0.208666	-1.06104	-0.449986	0.98745	0.102536	-0.8557	-2.16728	-0.285549
NDTX071258B-1R	0.370705	0.528801	0.922343	-0.993169	1.40917	-0.459884	1.13321	-0.0515204	-1.76616	2.78528	0.717462	0.296432	5.97434	0.787147
NDTX081451CBs-1Y/Y	-1.13037	-1.9178	-0.462463	-0.776322	-0.680713	-1.19269	-0.332557	-1.29046	0.627428	-0.552098	-0.322066	0.0280281	-9.6251	-1.26815
NDTX081618-1P/P	1.31335	0.347843	0.454595	-0.699746	1.33796	-0.567018	0.178179	0.381661	-0.0829425	1.39042	1.22267	-1.0181	4.8187	0.634887
NDTX081644-CAB-2W	0.795599	-0.418142	1.37481	-1.60824	1.94403	-1.21354	0.245424	-0.497645	0.452438	-0.193807	-0.46115	-0.657369	-0.489816	-0.0645356
NDTX081648CB-13W	0.0369452	-0.795788	0.976385	-0.965827	-1.54507	-0.718235	-1.40879	-0.647394	0.289231	-1.31658	-0.537932	-0.684593	-9.37384	-1.23505
NDTX081648CB-1W	0.762229	0.481272	0.64615	-0.303513	-0.283965	-0.413485	-0.108797	-0.512519	0.00194154	0.481652	0.350829	-0.323924	0.156557	0.0206271
NDTX081648CB-4W	0.835011	0.0587867	1.56303	-0.560763	-1.15089	-1.05895	-1.75728	-0.81228	0.489094	-0.470636	-0.459033	-1.66549	-7.55896	-0.995928
NDTX091886-3P/P	-0.0774487	-0.633257	0.92545	-1.08052	-1.19709	-0.92807	-0.422916	0.00173259	-0.476989	-1.29757	-0.909857	-2.80346	-9.32118	-1.22811
NDTX091908AB-2W	-0.222468	-1.41662	0.67227	-1.28049	-0.0286675	-1.5111	0.846826	-0.928548	0.426699	0.181999	-0.333032	-1.74564	-5.42049	-0.714175
NDTX092237C-2P/W	0.379338	0.36411	0.683661	0.419332	0.00654335	-0.852124	0.479299	0.934897	-0.568292	-0.184417	-0.137733	-1.45783	1.48098	0.195126
NDTX092238Cs-1P/W	1.41362	0.452188	0.835869	-0.900784	2.2527	-0.696856	0.877908	0.861834	-0.795524	0.874674	1.39893	0.371193	8.68549	1.14435
NDTX4271-5R	0.296806	-1.04622	-0.185958	-0.972546	0.19669	-0.618121	0.515586	1.38358	-1.36826	0.416205	1.13839	1.11078	2.76609	0.364445
NDTX4756-1R/Y	0.709351	0.287361	0.216472	-1.81259	-0.503215	-1.43995	-1.18804	-1.89217	-0.499897	-0.111931	0.241039	-0.211084	-9.28487	-1.22332
NDTX4784-7R	0.315003	-1.05575	-0.233877	-1.00532	0.0828696	-0.622571	0.445297	1.36731	-1.47925	0.362344	1.08957	1.14536	2.22359	0.292968
NDTX4828-2R	0.760554	0.273171	0.0270779	-0.747544	1.32017	-0.186616	0.345181	0.0413317	-0.562225	2.73896	0.813118	1.61069	6.82038	0.898617
NDTX4930-5W	0.972502	-0.0696694	0.365184	-1.20821	0.0297555	-1.49033	0.349659	0.171523	0.392645	-0.291567	-0.0480884	-1.55356	-1.85897	-0.244927
NDTX5003-2R	0.960443	-0.155224	0.148624	-0.978592	0.203364	0.923604	-0.0234263	0.356039	-1.4419	0.0747388	0.952201	0.63958	1.99206	0.262463
NDTX5067-2R	0.9725	-0.133122	0.154923	-0.974388	0.221237	0.923949	0.000277624	0.359495	-1.39753	0.0682375	0.989707	0.661888	2.20695	0.290776
NDTX5438-11R	0.97215	1.12911	0.89069	-0.0579006	0.106914	-0.234558	0.438752	-0.272139	0.155442	0.556885	0.956393	-0.188007	4.62035	0.608752
NDTX6773-1W	0.87923	0.717658	1.92197	-1.29642	-0.438468	-1.3942	0.705104	-0.549472	0.0275475	-0.807487	0.409797	-0.915425	-0.584528	-0.0770143
NDTX731-1R	1.40214	1.05337	0.933976	-0.616105	0.974541	-0.616506	1.26945	0.515429	0.560303	-0.0487246	1.12597	1.5103	9.84903	1.29766
NDTX7590-3R	0.946289	-0.0673981	-0.409646	-0.362495	-0.728574	-0.160206	0.00578048	0.888166	-0.626866	0.390576	0.664221	0.139521	1.57332	0.207292
NDTX8773-4Ru	-0.482663	-0.393767	-1.61842	1.27233	1.48339	0.606368	0.199707	1.30831	2.50075	-0.205351	0.0185051	-0.327371	5.86981	0.773374
NDTX91068-11R	1.04138	0.785809	1.12678	-0.159929	-0.0766612	-0.286684	1.90572	1.11495	0.720733	0.775393	1.5399	1.49929	13.0074	1.71378
PORTX03PG25-2R/R	0.938705	0.987718	1.86191	-0.295127	-0.0231653	-1.05851	1.8589	1.11509	-0.282262	1.28728	0.36063	-0.0931552	9.63199	1.26906
PTTX05PG07-1W	-0.68269	-1.35976	-1.24393	-1.25168	-1.46544	-1.04351	-0.407989	0.645042	-1.83499	-0.499774	-0.796024	-2.28592	-11.9896	-1.57969
Rio Rojo	-0.154516	-0.086162	-0.17826	-1.07691	0.477099	-0.682023	0.142777	-0.553613	-0.694606	-0.0937084	-0.667267	0.451966	-3.52606	-0.464575
Russet Burbank	-1.95986	-0.146516	0.153625	1.66924	-0.409193	1.49234	-1.41085	-0.0232734	0.240546	-0.639185	-0.923576	-1.16568	-4.5565	-0.60034
Russet Norkotah 102	-0.249582	-0.212401	-0.685974	1.8248	1.38312	1.59252	-1.04106	0.940496	-0.694209	1.11096	-0.448695	-0.373468	3.04595	0.401319
Russet Norkotah 112	-0.25217	-0.219006	-0.693756	1.82123	1.3823	1.58794	-1.04234	0.944061	-0.697798	1.11118	-0.454357	-0.37041	3.01859	0.397714
Russet Norkotah 223	-0.251098	-0.235231	-0.70831	1.82487	1.37478	1.59461	-1.05573	0.9475	-0.721046	1.11001	-0.455372	-0.36211	2.95464	0.389287
Russet Norkotah 278	-0.2534	-0.234896	-0.709392	1.82685	1.3762	1.59836	-1.05846	0.953059	-0.715483	1.1053	-0.45211	-0.370316	2.96031	0.390035
Russet Norkotah 296	-0.24997	-0.221998	-0.700969	1.82482	1.36801	1.58675	-1.04911	0.942948	-0.697819	1.10282	-0.451322	-0.375921	2.97208	0.391585
Russet Norkotah	-0.253133	-0.236358	-0.708464	1.82829	1.37838	1.5988	-1.0536	0.949939	-0.720903	1.10711	-0.448022	-0.369436	2.96894	0.391172
Stampede Russet	-0.897998	-0.499282	0.0891562	-0.267689	0.464088	0.39318	-0.812817	0.0595148	-2.35954	2.26156	0.221394	0.028376	-2.07335	-0.273174
Tacna	-0.809439	0.252714	2.03948	1.13184	-1.0519	-0.183711	0.0164965	-1.11621	2.16162	-0.781614	-0.945437	0.26289	-0.122999	-0.0162057
Tokio	-1.0977	-0.252079	0.158914	-0.648615	-1.37849	-0.416214	-0.0666752	-1.98267	1.25508	-1.05993	-1.14953	-0.0536856	-8.74095	-1.15166
TX03196-1W	1.92938	-0.20829	0.163278	-1.43828	0.772665	-1.34627	1.74053	0.624596	1.08605	1.14028	1.44686	-0.661852	7.61407	1.00319
TX05249-10W	1.62073	1.36881	0.691335	-0.950366	0.871971	-0.987823	0.537123	1.51888	2.83073	-0.222155	0.560675	-1.4789	8.41701	1.10898
TX05249-11W	0.550151	-0.154288	0.991761	-0.668939	-1.66911	-1.28337	0.79095	0.619236	2.47836	0.372298	-0.402876	-1.24204	1.79231	0.236146
TX05249-3W	1.34377	0.870278	1.57804	-0.989123	-0.804751	-0.859488	0.684966	0.788789	1.06755	1.23495	-0.284656	-0.861714	5.24237	0.690706
TX08350-12Ru	-0.841469	-0.891829	-2.26801	0.48619	0.191073	1.18716	-0.63122	0.213987	-1.19373	-0.211975	-1.31882	-1.02242	-6.71831	-0.885168
Vanguard Russet	-0.46931	-0.455836	-1.64209	1.12863	1.38704	0.885717	-0.70137	1.0246	-1.57024	0.782194	-0.961154	-0.558333	-0.826926	-0.108951
TX08385-2P/YP	-0.372208	-0.815754	0.155072	-0.98716	-0.680278	-2.10423	-0.200025	-0.49713	0.00364752	-1.64569	0.385952	-2.76309	-10.218	-1.34627
TX09396-1W	-0.289814	-0.912258	0.93207	-1.21766	-1.4464	-1.03286	-0.299078	-0.605752	-0.830813	-1.94713	-1.47477	-0.761069	-10.7904	-1.42168
TX09403-21W	0.770381	-0.496132	0.184928	-2.11607	-0.529889	-1.59719	-0.504193	0.261128	-1.50432	-1.57613	-0.0149911	-0.817379	-8.18292	-1.07814
TX09414-1W	0.614358	1.21634	0.922471	0.248457	-0.722353	0.193597	0.38549	0.260816	1.76528	-1.62644	0.62113	-0.487108	4.03834	0.532071
TX10437-9Pyspl/Y	1.73487	3.29059	1.10538	0.361102	1.13804	-0.158542	1.95912	-0.468898	1.65532	-0.263983	2.72799	2.20024	16.7714	2.20972
TX11454-9Ru/Y	-0.523035	-0.680529	-1.27703	1.22732	0.361577	0.601448	-1.10344	0.0447209	-0.793471	-0.112468	-0.599204	-0.619736	-4.53257	-0.597187
TX11461-3W	0.123326	-0.0148429	0.33696	-0.971922	-2.17269	-0.506961	0.521716	-0.485466	-0.049717	-1.8762	-0.00702505	-1.24301	-6.30957	-0.831316
TX12474-1P/R	1.4061	1.45514	1.90044	0.810388	1.19828	-0.708104	0.885353	1.02297	-0.392505	0.7558	0.737294	-0.713746	10.2657	1.35256
TX12484-4W	-0.0283964	-0.83264	0.552391	-1.07798	-1.8541	-0.540271	0.724867	0.408882	-0.728622	-0.870737	-0.181031	-1.90001	-5.1939	-0.684321
TX13590-9Ru	-1.45757	-1.00796	-2.29001	1.07231	-0.632027	0.608589	-0.904436	0.523102	-1.32052	-1.43134	-1.67083	-1.50566	-10.3977	-1.36994
TX14611-1R	-0.473135	1.77484	0.580476	0.39492	-0.16906	0.257424	2.947	0.544806	2.28145	0.109656	0.544916	0.999544	13.2846	1.75031
TX1475-3W	0.831647	0.0710816	-0.206459	-1.23889	-0.427873	-0.443603	0.826905	-0.242587	0.76957	-0.665559	0.057256	-1.38853	-1.47272	-0.194038
Sierra GoldTM	-0.526794	-1.25167	-1.35496	0.298249	-1.10684	-1.00584	-0.856924	-0.679187	-0.601634	-0.878681	-0.953626	-0.0705444	-10.5246	-1.38666
TX1617-1W/Y	-0.323287	-0.216136	-0.126022	-0.208835	-0.108891	-0.765629	-1.53949	-0.747036	-0.631886	-0.465242	-0.645379	-0.769534	-8.8339	-1.16391
TX1673-1W/Y	0.650918	-1.23971	-1.00777	-0.144209	-0.903956	-1.04877	-0.783699	-0.4657	0.57845	-1.47254	0.0394885	-0.863558	-7.91046	-1.04224
TX6-1216-1Ru	-0.223761	-0.341182	-0.785697	1.33995	0.93921	0.791073	-0.0920261	1.73573	0.864538	-0.288568	-0.0817394	-0.626778	4.87445	0.642231
TX09403-15W	0.780248	-0.508019	0.223245	-2.11728	-0.50041	-1.60174	-0.521849	0.258777	-1.48431	-1.57233	-0.0175144	-0.809123	-8.13338	-1.07161
TXA549-1Ru	-1.45024	-0.995303	-2.28995	1.0848	-0.622829	0.613346	-0.892705	0.524641	-1.2995	-1.41847	-1.6555	-1.48081	-10.2506	-1.35056
TXNS106	-0.249533	-0.231053	-0.703401	1.82939	1.38451	1.59403	-1.05319	0.948121	-0.707556	1.11395	-0.4479	-0.369506	3.00279	0.395631
TXNS118	-0.251931	-0.232287	-0.708198	1.83024	1.37492	1.59472	-1.05397	0.951762	-0.711948	1.10361	-0.450626	-0.37101	2.97307	0.391716
TXNS249	-0.240171	-0.219405	-0.693731	1.82811	1.37579	1.59371	-1.04313	0.950466	-0.706526	1.10148	-0.445282	-0.367202	3.04146	0.400727
TXYG79	0.132211	-0.563126	-0.7298	-0.490035	0.0850431	-1.2138	-0.323345	-1.13249	-1.12884	-0.364562	0.0305605	-0.691901	-7.84591	-1.03374
UMTX383-3Yrdspl/Y	-0.835928	1.34536	1.28989	-0.0182226	-0.787834	0.48876	0.0524989	-1.68309	-0.183407	-0.181066	-0.566414	0.345886	-2.36415	-0.311487
White LaSoda	0.970184	0.194552	0.752477	-0.651905	-0.0266475	-0.536903	1.11481	0.993968	2.30735	-0.495992	0.89352	0.806239	8.43043	1.11075
